# Supplementary material for: Genome-wide DNA methylation profiling in chronic lymphocytic leukaemia
Source: Front Genet. 2023 Jan 11;13:1056043. doi: 10.3389/fgene.2022.1056043 (PMC9873975; doi:10.3389/fgene.2022.1056043)
Supplement: Supplementary file 10 [file Table8.xlsx]

## Sheet: Supplementary Table S8A
DMEGs with DMPs in body regions all positive with expression (N = 335)
symbol	baseMean	log2FoldChange	lfcSE	stat	pvalue	padj	DMP_num	DMP_sites	DMP_features	DMP_cgi	DMP_average_deltaBeta	DMP_body_status	DMP_body_num	DMP_body_average_deltabeta
KCNMA1	24.6034	-6.39064	1.28765	-4.96303	6.94e-07	1.76e-05	27	cg02172819;cg02499967;cg02636348;cg02727484;cg04912778;cg05907577;cg05908691;cg06828335;cg07464125;cg12614113;cg14601981;cg15200789;cg15754112;cg15863827;cg16055185;cg19039583;cg19273378;cg19427642;cg19730814;cg22796248;cg23107301;cg23533270;cg25518362;cg26091990;cg26442890;cg26611809;cg27465618	Body;Body;Body;Body;Body;Body;Body;Body;Body;Body;Body;Body;Body;Body;Body;Body;Body;Body;Body;Body;Body;3'UTR;Body;Body;Body;Body;Body	opensea;opensea;opensea;opensea;opensea;opensea;opensea;opensea;opensea;opensea;opensea;opensea;opensea;opensea;opensea;opensea;opensea;opensea;opensea;opensea;opensea;opensea;opensea;opensea;opensea;shelf;opensea	-0.323175	hypo	26	-0.315614
COL11A2	27.0747	-1.17598	0.407354	-2.88688	0.00389081	0.021137	17	cg00866054;cg02890435;cg04820679;cg09510921;cg12945707;cg13106156;cg15081128;cg17790159;cg17931986;cg18375610;cg18384402;cg18651026;cg20506659;cg21974506;cg22748722;cg23912266;cg26998481	Body;3'UTR;Body;Body;Body;Body;Body;Body;3'UTR;Body;Body;Body;Body;Body;Body;Body;3'UTR	opensea;shore;shelf;opensea;shelf;opensea;opensea;shelf;shore;opensea;opensea;opensea;shelf;opensea;opensea;opensea;shore	-0.289257	hypo	14	-0.278979
ZMIZ1	510.324	-2.94505	0.601976	-4.8923	9.97e-07	2.41e-05	13	cg02795981;cg02851873;cg04714939;cg06308720;cg09936762;cg13843840;cg14841514;cg15522953;cg16854826;cg17753789;cg17823346;cg18295744;cg20543544	Body;5'UTR;5'UTR;Body;5'UTR;Body;5'UTR;5'UTR;5'UTR;Body;5'UTR;5'UTR;Body	opensea;opensea;opensea;shelf;opensea;opensea;opensea;opensea;opensea;opensea;opensea;opensea;island	-0.358462	hypo	5	-0.410108
ADAP1	52.8816	-1.33619	0.526409	-2.53832	0.0111387	0.0472147	12	cg01617071;cg04786889;cg06589239;cg10211456;cg13548189;cg13687274;cg15108645;cg18664596;cg19445335;cg19471433;cg23667602;cg27287951	Body;Body;Body;Body;Body;Body;3'UTR;Body;Body;Body;Body;Body	shore;shelf;shore;shelf;shore;island;shore;shore;island;shore;shore;shore	-0.432865	hypo	11	-0.440582
SLCO3A1	40.7502	-2.78346	0.907304	-3.06783	0.00215616	0.0133893	11	cg00314343;cg01240823;cg03756778;cg11330307;cg11680590;cg11859489;cg12667732;cg15841533;cg21656246;cg26677406;cg27070951	Body;Body;Body;Body;Body;Body;Body;3'UTR;Body;Body;Body	opensea;opensea;opensea;opensea;opensea;shore;opensea;opensea;opensea;opensea;opensea	-0.356196	hypo	10	-0.369035
GAS7	190.272	-2.55063	0.941886	-2.708	0.00676895	0.0322627	11	cg00052665;cg03762242;cg07049421;cg12642651;cg18346531;cg18369972;cg18657751;cg20572153;cg21554670;cg22596049;cg25558027	TSS1500;Body;Body;Body;Body;Body;Body;Body;Body;Body;Body	opensea;opensea;opensea;opensea;opensea;opensea;opensea;opensea;opensea;opensea;opensea	-0.348423	hypo	10	-0.342857
FMNL2	110.022	-1.84969	0.551046	-3.35669	0.00078882	0.00608818	10	cg04215359;cg05027533;cg05696136;cg07298347;cg11173609;cg12505929;cg16794471;cg24749089;cg26207245;cg27617780	Body;Body;Body;Body;Body;Body;Body;Body;Body;Body	opensea;opensea;opensea;opensea;opensea;opensea;opensea;opensea;opensea;opensea	-0.299314	hypo	10	-0.299314
DIRC3	8.58665	-3.21687	0.991069	-3.24586	0.00117097	0.00832455	10	cg00792015;cg03512250;cg05511924;cg07502050;cg12820310;cg14538944;cg22039960;cg22245446;cg24980995;cg26501046	Body;Body;Body;Body;Body;Body;Body;Body;Body;Body	opensea;opensea;opensea;opensea;opensea;opensea;opensea;opensea;opensea;opensea	-0.372625	hypo	10	-0.372625
COL23A1	4.15139	-1.73744	0.590564	-2.942	0.00326099	0.0184586	10	cg00234625;cg05008898;cg07427642;cg07841353;cg08378286;cg08684511;cg10570993;cg12877223;cg16181383;cg22649181	Body;Body;Body;Body;Body;Body;Body;Body;Body;Body	opensea;shore;shore;opensea;opensea;opensea;opensea;opensea;opensea;shore	-0.276286	hypo	10	-0.276286
DOT1L	1317.81	-1.0364	0.223929	-4.62826	3.69e-06	7.33e-05	9	cg00043005;cg04173586;cg05298026;cg05345285;cg08397968;cg11251006;cg11776115;cg13643356;cg26903766	Body;Body;Body;Body;Body;Body;Body;Body;3'UTR	island;shore;island;shore;island;island;shore;shelf;shore	-0.379146	hypo	8	-0.398323
IQSEC1	3951.65	-1.53619	0.473576	-3.2438	0.00117946	0.00836817	9	cg01044637;cg01659586;cg01831160;cg08096381;cg09437283;cg11145772;cg18644782;cg19769521;cg20957164	Body;Body;Body;Body;Body;Body;Body;Body;Body	opensea;shore;shore;opensea;shore;opensea;opensea;shelf;opensea	-0.272582	hypo	9	-0.272582
MYO1B	30.2586	-5.53209	2.09388	-2.64203	0.00824118	0.0375009	9	cg01410923;cg02523585;cg06844526;cg07295669;cg09760210;cg12404831;cg22885000;cg24376339;cg24394340	Body;Body;Body;Body;3'UTR;5'UTR;Body;Body;Body	opensea;opensea;opensea;opensea;opensea;shelf;opensea;opensea;opensea	-0.398803	hypo	7	-0.402984
KIF26B	40.9099	-3.25466	0.573896	-5.67117	1.42e-08	6.06e-07	8	cg01565291;cg03327643;cg11587466;cg15057323;cg15358723;cg16362305;cg23014549;cg25008504	Body;Body;Body;Body;Body;Body;Body;Body	opensea;shore;shelf;shelf;shelf;shelf;opensea;opensea	-0.363425	hypo	8	-0.363425
MYO1E	2458.56	-1.20999	0.342059	-3.53737	0.000404128	0.00352522	8	cg02794990;cg08423142;cg08891123;cg13887966;cg15851882;cg21598389;cg25970356;cg25980168	Body;Body;Body;Body;Body;Body;Body;Body	shelf;opensea;opensea;opensea;opensea;opensea;opensea;shore	-0.456904	hypo	8	-0.456904
CRIM1	186.574	-1.67802	0.650954	-2.57778	0.00994374	0.0432903	8	cg00296578;cg01958295;cg08801446;cg09530108;cg14446951;cg17516469;cg20348189;cg20391432	Body;Body;Body;Body;Body;Body;Body;Body	opensea;opensea;opensea;shore;opensea;opensea;opensea;opensea	-0.356842	hypo	8	-0.356842
MED12L	35.7991	-4.87216	0.614781	-7.92503	2.28e-15	4.39e-13	7	cg00091349;cg09410045;cg09432154;cg11919271;cg12207930;cg21793358;cg25117092	Body;Body;Body;Body;Body;Body;Body	opensea;opensea;opensea;opensea;opensea;opensea;opensea	-0.379019	hypo	7	-0.379019
ABI3	110.503	-3.38241	0.606711	-5.57499	2.48e-08	9.83e-07	7	cg00980784;cg03419646;cg05716556;cg11164649;cg24521869;cg25616535;cg25839227	TSS200;Body;TSS200;Body;Body;Body;Body	opensea;island;opensea;island;island;shelf;opensea	-0.399015	hypo	5	-0.4266
NEDD9	1150.4	-1.05974	0.242619	-4.36792	1.25e-05	0.000203386	7	cg02029843;cg08822625;cg11406667;cg20510285;cg25250968;cg26785468;cg26844213	Body;5'UTR;Body;Body;5'UTR;TSS1500;TSS1500	opensea;opensea;opensea;opensea;opensea;opensea;opensea	-0.418828	hypo	3	-0.406496
MACROD2	429.19	-2.41769	0.620373	-3.89716	9.73e-05	0.00111469	7	cg01552272;cg04476531;cg04624110;cg23169957;cg25557432;cg25697357;cg26059153	TSS200;5'UTR;TSS200;TSS200;TSS200;Body;1stExon	island;opensea;island;island;island;shelf;island	0.165418	hypo	1	-0.248308
SYNPO	363.519	-3.03526	0.825593	-3.67646	0.000236495	0.00230678	7	cg00089453;cg00227093;cg08125125;cg08413646;cg12921411;cg13590277;cg21525330	Body;TSS1500;TSS200;5'UTR;Body;TSS1500;Body	shore;opensea;opensea;opensea;island;opensea;opensea	-0.361612	hypo	3	-0.316395
ADAMTS17	4.27527	-3.19952	0.889887	-3.59542	0.000323868	0.0029612	7	cg00149679;cg03300787;cg04822808;cg05027458;cg20941820;cg21314318;cg27344315	Body;Body;5'UTR;5'UTR;TSS200;Body;Body	opensea;island;island;island;island;opensea;opensea	-0.0247326	hypo	4	-0.251754
GRM4	1.53568	-2.95163	0.891172	-3.31208	0.000926045	0.00690218	7	cg01081636;cg01140008;cg12008034;cg15884992;cg19471040;cg20772037;cg21599324	Body;Body;Body;Body;Body;Body;Body	shore;shore;shore;shelf;opensea;opensea;opensea	-0.319684	hypo	7	-0.319684
SORL1	1861.38	-2.8094	0.909314	-3.08958	0.00200441	0.0126753	7	cg05075579;cg07356488;cg08441314;cg10908953;cg14239983;cg20615117;cg22327175	Body;Body;Body;TSS1500;Body;Body;Body	opensea;opensea;opensea;shore;opensea;opensea;shore	-0.343235	hypo	6	-0.343718
USH2A	1.28444	-3.70023	1.42003	-2.60574	0.00916769	0.040664	7	cg00972761;cg03607708;cg05126581;cg14524956;cg15590780;cg17222143;cg26036678	Body;Body;Body;Body;1stExon;Body;Body	opensea;opensea;opensea;opensea;opensea;opensea;opensea	-0.248763	hypo	6	-0.25177
ALK	2.69496	-1.90012	0.736936	-2.5784	0.00992577	0.0432385	7	cg03602297;cg09942743;cg14326644;cg16699354;cg16703008;cg20954219;cg21550785	Body;Body;Body;Body;Body;Body;Body	shore;opensea;opensea;shore;opensea;opensea;opensea	-0.265216	hypo	7	-0.265216
KIFC1	18.4979	-5.10762	0.554561	-9.21021	3.25e-20	1.52e-17	6	cg07903144;cg11223101;cg15646778;cg15924693;cg21547095;cg27261921	TSS1500;Body;Body;TSS1500;Body;Body	shore;shore;shore;shore;shore;shore	-0.313902	hypo	4	-0.333686
SLC12A8	19.9271	-3.19126	0.398229	-8.01364	1.11e-15	2.33e-13	6	cg00316080;cg01432055;cg06713373;cg11591485;cg17478992;cg25213968	Body;Body;Body;Body;Body;Body	opensea;opensea;opensea;opensea;opensea;opensea	-0.492662	hypo	6	-0.492662
NEK6	1337.72	-1.65487	0.259294	-6.38223	1.75e-10	1.21e-08	6	cg13505631;cg14036069;cg14109456;cg14285539;cg14289738;cg14536906	TSS1500;5'UTR;5'UTR;5'UTR;Body;5'UTR	shore;opensea;opensea;opensea;opensea;opensea	-0.435728	hypo	1	-0.335013
TMC8	6292.75	-1.3391	0.243875	-5.49095	4e-08	1.48e-06	6	cg01125010;cg03596178;cg04945945;cg05637296;cg16935597;cg26003388	Body;3'UTR;Body;Body;Body;Body	shelf;shore;shore;shore;shore;shore	-0.341915	hypo	5	-0.350159
SAMD4A	108.8	-3.84498	0.710044	-5.41514	6.12e-08	2.14e-06	6	cg05130075;cg07449447;cg07921759;cg13994599;cg14187687;cg21554616	Body;Body;Body;5'UTR;Body;5'UTR	opensea;shore;opensea;shelf;opensea;shore	-0.476995	hypo	4	-0.510615
ASAP1	1245.03	-1.0614	0.197984	-5.36105	8.27e-08	2.77e-06	6	cg00077877;cg00162859;cg00659129;cg02771336;cg06404572;cg27627524	TSS1500;Body;TSS1500;Body;Body;Body	opensea;opensea;opensea;opensea;shelf;opensea	-0.428059	hypo	4	-0.454693
XKR6	220.488	-1.36319	0.276606	-4.92826	8.3e-07	2.07e-05	6	cg03438558;cg06819296;cg09697033;cg16513326;cg20858107;cg23565027	Body;Body;Body;Body;Body;Body	opensea;opensea;shore;shelf;opensea;opensea	-0.37428	hypo	6	-0.37428
ANKRD33B	63.7142	-4.25817	1.28453	-3.31497	0.000916541	0.00684749	6	cg01089425;cg08944026;cg14629055;cg17320136;cg23297413;cg24894783	3'UTR;Body;TSS1500;Body;Body;Body	opensea;opensea;island;shelf;opensea;opensea	-0.40691	hypo	4	-0.426774
MCC	142.674	-1.20099	0.428311	-2.80402	0.00504694	0.0258726	6	cg02021529;cg02528008;cg09167779;cg18276155;cg19075111;cg23317604	Body;Body;Body;Body;Body;Body	opensea;opensea;opensea;opensea;opensea;opensea	-0.349423	hypo	6	-0.349423
CTNNA3	2.42329	-1.58912	0.613584	-2.58989	0.00960065	0.0420991	6	cg06044004;cg07020596;cg13215003;cg15773925;cg15833746;cg19996026	Body;Body;Body;Body;Body;5'UTR	opensea;opensea;opensea;opensea;opensea;opensea	-0.33752	hypo	5	-0.356667
P2RX5	1775.25	-2.49647	0.352183	-7.08857	1.36e-12	1.54e-10	5	cg03317245;cg03828109;cg06066088;cg10329694;cg13246592	TSS1500;TSS1500;TSS1500;Body;TSS1500	shore;shore;shore;opensea;shore	-0.326864	hypo	1	-0.308027
COL5A1	6.11136	-6.2977	0.901195	-6.98817	2.78e-12	2.95e-10	5	cg13567205;cg13854962;cg14207613;cg14656180;cg21208686	Body;Body;Body;Body;Body	shelf;shelf;shelf;opensea;shore	-0.2698	hypo	5	-0.2698
ACAP3	717.903	-2.14564	0.392201	-5.47078	4.48e-08	1.62e-06	5	cg06759632;cg07181952;cg09556527;cg18565510;cg22675767	Body;Body;Body;Body;Body	opensea;shelf;shelf;shelf;opensea	-0.2977	hypo	5	-0.2977
DOK3	1595.92	-1.68591	0.318688	-5.29016	1.22e-07	3.87e-06	5	cg02083319;cg07265015;cg13370819;cg17200320;cg18649283	3'UTR;TSS1500;Body;Body;Body	shore;opensea;shore;shore;shore	-0.369406	hypo	3	-0.281081
DDAH1	14.117	-3.28954	0.677519	-4.85527	1.2e-06	2.84e-05	5	cg06033321;cg14322224;cg15991082;cg18808054;cg21523496	5'UTR;TSS1500;Body;5'UTR;5'UTR	opensea;shore;opensea;opensea;opensea	-0.361985	hypo	1	-0.495097
MEGF11	21.61	-2.13945	0.450973	-4.74406	2.09e-06	4.51e-05	5	cg02736313;cg10081086;cg10583322;cg12286910;cg20597569	Body;Body;Body;Body;Body	shelf;opensea;opensea;opensea;opensea	-0.269728	hypo	5	-0.269728
AHRR	35.8166	-2.87351	0.649341	-4.42528	9.63e-06	0.000162754	5	cg01097768;cg02385153;cg07599136;cg14982043;cg17248487	Body;Body;Body;Body;Body	opensea;opensea;opensea;opensea;opensea	-0.259263	hypo	5	-0.259263
STK39	304.038	-1.33004	0.326971	-4.06775	4.75e-05	0.000615732	5	cg06754557;cg07992385;cg13345122;cg17252489;cg19848140	Body;Body;Body;Body;Body	opensea;opensea;opensea;opensea;opensea	-0.376416	hypo	5	-0.376416
DENND3	1113.86	-3.30059	0.832089	-3.96663	7.29e-05	0.000877594	5	cg07161062;cg12281527;cg14480530;cg15891546;cg16494567	3'UTR;Body;Body;Body;Body	opensea;opensea;island;shelf;opensea	-0.297674	hypo	4	-0.309733
PLXNB2	368.229	-2.22281	0.594399	-3.73959	0.00018432	0.00187494	5	cg00243272;cg03149749;cg05799169;cg12519135;cg18399427	Body;5'UTR;Body;Body;Body	island;shelf;island;shore;shore	-0.306591	hypo	4	-0.254493
NMNAT3	17.9822	-2.13708	0.588899	-3.62895	0.000284578	0.00267586	5	cg03891318;cg12987403;cg21731304;cg22462109;cg25780109	5'UTR;5'UTR;5'UTR;3'UTR;Body	opensea;opensea;opensea;opensea;opensea	-0.33821	hypo	1	-0.367972
PLEKHA6	15.9311	-2.73379	0.805918	-3.39214	0.00069349	0.00546348	5	cg08355099;cg11131599;cg13056222;cg19272720;cg23234811	Body;Body;Body;5'UTR;Body	shore;shelf;opensea;opensea;shelf	-0.369377	hypo	4	-0.336162
ARHGAP10	10.282	-2.89605	0.862116	-3.35924	0.000781569	0.0060404	5	cg01165159;cg03553407;cg05934276;cg09910856;cg24116965	Body;Body;Body;Body;Body	opensea;opensea;opensea;opensea;shore	-0.306248	hypo	5	-0.306248
C12orf77	48.0484	-2.08186	0.648883	-3.20838	0.00133484	0.00919558	5	cg06099459;cg06530347;cg16484526;cg21156602;cg21368143	TSS200;Body;TSS1500;3'UTR;TSS1500	opensea;opensea;opensea;opensea;opensea	-0.570056	hypo	1	-0.558626
SH3RF3	6.89168	-3.49077	1.1422	-3.05619	0.00224168	0.0137792	5	cg00482162;cg09500437;cg10363926;cg26202964;cg27294813	Body;Body;Body;Body;Body	opensea;opensea;opensea;opensea;opensea	-0.307291	hypo	5	-0.307291
TJP1	1.63562	-6.10985	2.01187	-3.03691	0.0023902	0.0144304	5	cg06525993;cg09812397;cg12685846;cg16225947;cg19965221	Body;Body;TSS200;Body;5'UTR	opensea;opensea;island;opensea;island	-0.0855096	hypo	3	-0.312649
TRERF1	135.55	-2.53639	0.858748	-2.95359	0.00314105	0.0179084	5	cg04291097;cg09804858;cg17291767;cg20732076;cg26581228	Body;5'UTR;Body;5'UTR;5'UTR	opensea;opensea;shelf;opensea;opensea	-0.311333	hypo	2	-0.279037
NRP2	18.8361	-3.0158	1.03348	-2.91811	0.00352164	0.0195455	5	cg00086429;cg03141944;cg06285439;cg11114141;cg25320169	Body;Body;Body;Body;3'UTR	opensea;opensea;opensea;opensea;opensea	-0.327794	hypo	4	-0.329507
DEF8	5477.36	-1.06083	0.387813	-2.73542	0.0062301	0.0304416	5	cg04752812;cg07329987;cg10075157;cg16504670;cg26894841	TSS1500;5'UTR;Body;TSS1500;5'UTR	island;shelf;island;island;shore	-0.349109	hypo	1	-0.230678
SEMA7A	1566.14	-1.53086	0.591966	-2.58607	0.00970777	0.0424969	5	cg17917837;cg18335991;cg24184689;cg26169213;cg27157619	Body;Body;Body;Body;Body	island;shore;shelf;shore;opensea	-0.414404	hypo	5	-0.414404
MICAL3	2914.44	-1.30907	0.207054	-6.32236	2.58e-10	1.72e-08	4	cg00040575;cg04520704;cg12923994;cg21103992	5'UTR;Body;Body;Body	shore;shore;shelf;shore	-0.309995	hypo	3	-0.30398
MET	11.989	-8.60987	1.57063	-5.48178	4.21e-08	1.54e-06	4	cg11319403;cg22116492;cg24197567;cg24627299	Body;Body;Body;TSS1500	opensea;opensea;opensea;shore	-0.152462	hypo	3	-0.273716
SLC26A1	86.5334	-1.39339	0.256466	-5.43305	5.54e-08	1.96e-06	4	cg09153458;cg09359391;cg11017086;cg24226891	Body;Body;Body;Body	shore;shore;shore;shore	-0.301257	hypo	4	-0.301257
CIITA	17017.3	-1.33317	0.27506	-4.84684	1.25e-06	2.93e-05	4	cg02525597;cg04945379;cg05371498;cg07371747	Body;TSS1500;Body;Body	shelf;shelf;opensea;opensea	-0.398816	hypo	3	-0.393177
WNT4	19.7451	-2.13349	0.440646	-4.84173	1.29e-06	2.99e-05	4	cg00356045;cg09180977;cg12098183;cg17022577	Body;Body;Body;Body	opensea;shelf;shore;shelf	-0.366523	hypo	4	-0.366523
ANKLE1	129.269	-1.06703	0.227404	-4.69223	2.7e-06	5.63e-05	4	cg03745160;cg05490871;cg19737225;cg26249852	Body;TSS1500;TSS200;TSS200	shore;shore;shore;shore	-0.462153	hypo	1	-0.446099
GRAMD4	554.876	-1.90907	0.41683	-4.57999	4.65e-06	8.87e-05	4	cg00319157;cg05002837;cg05821464;cg13788891	Body;Body;Body;Body	shore;shore;shore;island	-0.420125	hypo	4	-0.420125
RARB	15.4258	-1.45774	0.321663	-4.53188	5.85e-06	0.000107456	4	cg06705767;cg20981919;cg23518541;cg27574595	5'UTR;Body;5'UTR;Body	opensea;opensea;opensea;opensea	-0.253812	hypo	2	-0.249603
FMNL3	2203.42	-1.34473	0.307914	-4.36722	1.26e-05	0.000203707	4	cg02054252;cg04070601;cg12905592;cg16797275	Body;Body;Body;Body	opensea;opensea;opensea;shelf	-0.446779	hypo	4	-0.446779
MGLL	192.652	-2.71213	0.651773	-4.16115	3.17e-05	0.000437218	4	cg08036172;cg13050716;cg14476212;cg22514722	Body;Body;Body;Body	opensea;opensea;opensea;opensea	-0.357547	hypo	4	-0.357547
SLC5A10	83.3299	-1.69439	0.417764	-4.05584	5e-05	0.000640377	4	cg03972823;cg23348010;cg24778683;cg25708364	Body;Body;Body;Body	shelf;shore;opensea;shore	-0.364796	hypo	4	-0.364796
NTN1	21.5786	-1.35734	0.346539	-3.91684	8.97e-05	0.00104049	4	cg15370309;cg17280134;cg23402144;cg25012274	Body;Body;Body;Body	shore;opensea;opensea;opensea	-0.268896	hypo	4	-0.268896
SRC	370.181	-1.18104	0.319309	-3.69874	0.000216674	0.00213984	4	cg08553950;cg12807924;cg23410129;cg24956391	5'UTR;Body;5'UTR;5'UTR	shore;shore;shore;shore	-0.499072	hypo	1	-0.211405
PIP4K2A	2763.61	-1.01003	0.283668	-3.56058	0.00037003	0.00329029	4	cg03473087;cg04813697;cg06974428;cg14215711	Body;Body;Body;Body	opensea;opensea;opensea;opensea	-0.454157	hypo	4	-0.454157
MPPED2	3.08345	-3.2515	0.972194	-3.3445	0.000824314	0.00630064	4	cg05600421;cg05798059;cg19949932;cg23064082	Body;Body;Body;Body	opensea;opensea;opensea;opensea	-0.452669	hypo	4	-0.452669
GPSM1	33.6905	-2.21226	0.700722	-3.15711	0.00159342	0.0105901	4	cg13957175;cg14040131;cg22984256;cg25884399	Body;Body;Body;Body	shelf;opensea;shore;island	-0.377271	hypo	4	-0.377271
UST	124.458	-2.52344	0.834779	-3.02289	0.00250377	0.0149575	4	cg02561343;cg17384769;cg18558968;cg23828170	Body;Body;Body;Body	opensea;opensea;opensea;opensea	-0.379458	hypo	4	-0.379458
SYN3	8.35659	-4.00358	1.39368	-2.87267	0.00407023	0.0219169	4	cg07641497;cg12498887;cg18473686;cg23855715	Body;Body;5'UTR;1stExon	shelf;shore;opensea;opensea	-0.356547	hypo	2	-0.358467
PHLDB2	56.088	-2.39504	0.834024	-2.87167	0.0040831	0.0219803	4	cg20203592;cg23960922;cg25087341;cg25799073	5'UTR;Body;5'UTR;5'UTR	opensea;opensea;opensea;opensea	-0.315108	hypo	1	-0.388079
GRIN2A	1.35162	-5.1002	1.8084	-2.82027	0.00479827	0.0248936	4	cg01348055;cg02415992;cg03015368;cg03616148	Body;Body;Body;Body	shore;opensea;opensea;opensea	-0.26615	hypo	4	-0.26615
IGF1	4.47776	-2.455	0.887774	-2.76534	0.00568632	0.0283887	4	cg02823066;cg12742178;cg14240353;cg25163611	Body;Body;Body;TSS1500	opensea;opensea;opensea;opensea	-0.376983	hypo	3	-0.356931
SLC5A9	1.84477	-3.30831	1.1992	-2.75878	0.00580181	0.0287786	4	cg05042706;cg06183287;cg21297772;cg25469314	Body;TSS1500;1stExon;Body	opensea;opensea;opensea;opensea	-0.437927	hypo	2	-0.524353
MATN2	19.1946	-1.12803	0.417206	-2.70378	0.00685564	0.0325641	4	cg05849612;cg08977887;cg16297171;cg20523466	Body;Body;Body;Body	opensea;opensea;opensea;opensea	-0.289783	hypo	4	-0.289783
ARHGAP22	50.5152	-2.28849	0.858083	-2.66698	0.0076537	0.0353301	4	cg07371628;cg12161982;cg23815312;cg27006721	Body;Body;Body;Body	shore;opensea;opensea;opensea	-0.236489	hypo	4	-0.236489
MEIS2	1.2241	-3.43145	1.30829	-2.62285	0.00871971	0.0391589	4	cg04482825;cg05334416;cg10451116;cg12241599	Body;Body;Body;Body	opensea;opensea;opensea;opensea	-0.340859	hypo	4	-0.340859
ANK3	87.3866	-2.503	0.958007	-2.61272	0.00898253	0.0400538	4	cg04768557;cg14011971;cg22150335;cg24332570	Body;Body;Body;Body	opensea;opensea;opensea;opensea	-0.33475	hypo	4	-0.33475
ADARB1	2685.35	-1.04911	0.401784	-2.61114	0.00902417	0.0401939	4	cg04233620;cg09676390;cg14526825;cg21024676	Body;TSS1500;3'UTR;5'UTR	opensea;shore;opensea;shelf	-0.332824	hypo	1	-0.341941
TK1	232.675	-2.31156	0.30906	-7.47935	7.47e-14	1.07e-11	3	cg06098276;cg20740903;cg25069807	Body;3'UTR;Body	opensea;opensea;opensea	-0.446533	hypo	2	-0.376008
KCNIP2	137.638	-3.34854	0.492482	-6.79932	1.05e-11	9.98e-10	3	cg17544177;cg23223933;cg25723614	Body;1stExon;Body	island;island;shore	-0.283376	hypo	2	-0.323515
SCARB1	155.28	-5.13823	0.772862	-6.64831	2.96e-11	2.53e-09	3	cg03319070;cg12079885;cg15282973	Body;Body;Body	shelf;shelf;shore	-0.321436	hypo	3	-0.321436
MYRIP	25.5819	-3.43639	0.523353	-6.5661	5.16e-11	4.11e-09	3	cg03824275;cg09883745;cg23024967	Body;Body;Body	opensea;opensea;opensea	-0.31801	hypo	3	-0.31801
HEXDC	971.606	-1.45242	0.253274	-5.73458	9.78e-09	4.34e-07	3	cg01935400;cg09921719;cg11952344	Body;Body;Body	shore;shelf;shore	-0.403197	hypo	3	-0.403197
LRP8	187.94	-1.9856	0.351798	-5.64415	1.66e-08	6.97e-07	3	cg11950754;cg17095731;cg24107728	Body;TSS1500;Body	opensea;shore;opensea	-0.26923	hypo	2	-0.22143
NECAB3	92.1674	-1.50095	0.27962	-5.36784	7.97e-08	2.68e-06	3	cg03904042;cg12710480;cg23067959	Body;Body;Body	island;shore;shore	-0.231625	hypo	3	-0.231625
RGS3	195.495	-1.75837	0.367507	-4.78459	1.71e-06	3.8e-05	3	cg14049634;cg14124261;cg14327394	Body;TSS1500;Body	opensea;opensea;opensea	-0.365858	hypo	2	-0.264129
AGRN	149.029	-2.14617	0.465522	-4.61025	4.02e-06	7.86e-05	3	cg02288964;cg13244315;cg22627753	Body;Body;Body	shore;shore;shore	-0.444123	hypo	3	-0.444123
SLC2A5	153.542	-3.63728	0.831551	-4.37409	1.22e-05	0.000198735	3	cg00113315;cg07247610;cg14961476	Body;3'UTR;TSS1500	shore;shore;shore	-0.326368	hypo	1	-0.24004
AKAP2	48.4227	-2.45973	0.566707	-4.34039	1.42e-05	0.000225978	3	cg13430173;cg14170787;cg21171115	Body;Body;Body	opensea;opensea;opensea	-0.38094	hypo	3	-0.38094
RECQL4	257.446	-1.31264	0.305115	-4.30211	1.69e-05	0.000259762	3	cg01081091;cg08468965;cg17926016	Body;3'UTR;Body	shore;shore;shore	-0.389848	hypo	2	-0.448541
CNIH3	25.6882	-1.10687	0.265679	-4.16621	3.1e-05	0.000429102	3	cg05376937;cg11526665;cg21444086	Body;Body;Body	opensea;opensea;opensea	-0.429191	hypo	3	-0.429191
TEAD3	3.32528	-2.47465	0.622693	-3.97411	7.06e-05	0.000854087	3	cg01546820;cg05431171;cg10893014	Body;5'UTR;5'UTR	shore;shelf;shelf	-0.4206	hypo	1	-0.360184
CD1C	410.821	-3.41905	0.893791	-3.82533	0.000130596	0.00141489	3	cg09149672;cg16993682;cg27534912	Body;TSS1500;TSS1500	opensea;opensea;opensea	-0.38667	hypo	1	-0.235363
TTLL11	61.8435	-1.10548	0.29017	-3.80977	0.000139098	0.00148608	3	cg11527279;cg13622265;cg13935380	Body;3'UTR;Body	island;opensea;opensea	-0.29834	hypo	2	-0.313657
CNTN6	1.70387	-6.66131	1.75515	-3.79529	0.000147469	0.00155855	3	cg07664856;cg16857113;cg19751562	TSS200;TSS1500;Body	opensea;opensea;opensea	-0.366008	hypo	1	-0.246294
ATP10B	3.75789	-4.18903	1.11254	-3.76528	0.000166364	0.00172873	3	cg02543268;cg09705798;cg13629358	5'UTR;Body;Body	opensea;opensea;opensea	-0.368618	hypo	2	-0.426077
CD72	2646.54	-1.44333	0.396729	-3.63808	0.000274683	0.00259826	3	cg03487430;cg13918628;cg18557145	Body;3'UTR;Body	shore;opensea;shore	-0.508431	hypo	2	-0.379127
GALNTL6	13.6354	-2.98325	0.826273	-3.61049	0.000305625	0.00282525	3	cg17895446;cg23603782;cg25281820	Body;Body;Body	opensea;opensea;opensea	-0.344952	hypo	3	-0.344952
TMEM184A	25.1091	-1.67221	0.469068	-3.56496	0.000363905	0.0032531	3	cg03664589;cg04633141;cg22500518	3'UTR;Body;3'UTR	island;shore;shore	-0.351854	hypo	1	-0.371338
TUBB	490.561	-1.24944	0.355503	-3.51456	0.000440485	0.00378654	3	cg08680415;cg17950410;cg26721803	TSS1500;TSS1500;Body	shore;shore;shore	-0.427296	hypo	1	-0.357
VGLL4	543.565	-1.12906	0.322225	-3.50396	0.000458395	0.00390761	3	cg00296038;cg03612519;cg22841079	Body;Body;Body	opensea;shore;opensea	-0.327223	hypo	3	-0.327223
OSBPL1A	11.8047	-2.64398	0.802909	-3.293	0.000991261	0.00729093	3	cg05709468;cg23742217;cg25983589	Body;Body;TSS1500	opensea;shore;island	-0.256359	hypo	2	-0.509182
SYT1	10.8078	-2.6174	0.809641	-3.2328	0.00122585	0.00862424	3	cg21958743;cg25214900;cg27663071	Body;Body;5'UTR	opensea;opensea;opensea	-0.304217	hypo	2	-0.352406
KCTD1	53.1474	-1.29038	0.401655	-3.21267	0.00131509	0.00909701	3	cg05840573;cg24128943;cg26755793	5'UTR;Body;TSS1500	shelf;opensea;opensea	-0.2827	hypo	1	-0.421644
TCF19	58.0226	-1.28378	0.399669	-3.21212	0.00131761	0.00911062	3	cg03303475;cg16095155;cg21799473	Body;Body;Body	shelf;shore;shore	-0.38666	hypo	3	-0.38666
B3GNTL1	153.915	-1.00051	0.324465	-3.08355	0.00204545	0.0128419	3	cg03585013;cg09575521;cg20198923	Body;Body;Body	opensea;opensea;opensea	-0.356515	hypo	3	-0.356515
SPATA21	15.3037	-1.61562	0.529557	-3.05088	0.0022817	0.0139441	3	cg20815571;cg20976831;cg26845278	TSS1500;Body;1stExon	shelf;opensea;shelf	-0.365622	hypo	1	-0.290749
SYN2	0.910673	-4.68342	1.57227	-2.97876	0.00289417	0.0167929	3	cg10110335;cg16858253;cg20888142	Body;Body;TSS200	shelf;shelf;island	-0.0816667	hypo	2	-0.308378
ZDHHC14	131.107	-2.84775	0.957271	-2.97486	0.00293122	0.0169572	3	cg01713311;cg07487751;cg10880973	Body;Body;Body	island;opensea;opensea	-0.360758	hypo	3	-0.360758
ABCA2	558.388	-1.39021	0.475681	-2.92257	0.00347152	0.019354	3	cg03698343;cg13795883;cg14485901	Body;Body;Body	shore;shore;shore	-0.308881	hypo	3	-0.308881
SLC47A1	2.34648	-2.30906	0.849923	-2.71679	0.00659188	0.0316339	3	cg04308167;cg08895056;cg10718608	Body;Body;Body	shelf;shore;shore	-0.306189	hypo	3	-0.306189
ADD2	256.654	-3.18325	1.22014	-2.60892	0.00908278	0.0403818	3	cg02674324;cg06915226;cg18067420	Body;5'UTR;Body	shore;opensea;opensea	-0.280253	hypo	2	-0.271628
CAMK2B	39.8465	-8.29033	0.71534	-11.5894	4.67e-31	1.02e-27	2	cg09999977;cg17387670	Body;Body	shore;shelf	-0.22906	hypo	2	-0.22906
OXNAD1	336.744	-2.04387	0.218494	-9.35435	8.41e-21	4.61e-18	2	cg11208165;cg16456087	5'UTR;Body	shore;opensea	-0.392893	hypo	1	-0.579883
ARMC9	35.8359	-3.18187	0.374952	-8.48608	2.14e-17	6.15e-15	2	cg09604569;cg26530942	Body;Body	opensea;shelf	-0.361862	hypo	2	-0.361862
CIT	147.934	-2.38389	0.31216	-7.63677	2.23e-14	3.6e-12	2	cg10923838;cg15886307	Body;TSS1500	shore;shore	-0.311721	hypo	1	-0.313543
PAQR4	26.0422	-4.4653	0.642535	-6.94951	3.67e-12	3.78e-10	2	cg04696391;cg05737682	Body;Body	shore;shore	-0.469193	hypo	2	-0.469193
SLC45A3	83.1957	-4.03601	0.598347	-6.74527	1.53e-11	1.39e-09	2	cg12178904;cg17723122	Body;5'UTR	island;opensea	-0.296224	hypo	1	-0.207899
DHRS9	15.9498	-5.35801	0.827575	-6.47436	9.52e-11	7.04e-09	2	cg01462353;cg05624376	Body;Body	opensea;opensea	-0.496695	hypo	2	-0.496695
RFTN1	1569.24	-3.0754	0.488543	-6.29506	3.07e-10	2.01e-08	2	cg04381957;cg16875864	5'UTR;Body	shelf;opensea	-0.374107	hypo	1	-0.351527
LYPLAL1	386.343	-1.4537	0.237306	-6.12587	9.02e-10	5.41e-08	2	cg07175582;cg19753174	Body;Body	opensea;shelf	-0.473288	hypo	2	-0.473288
KCNG2	4.03358	-3.93584	0.648877	-6.06561	1.31e-09	7.44e-08	2	cg23825213;cg25458083	TSS200;Body	island;shelf	-0.0355192	hypo	1	-0.284092
FBXL18	111.164	-1.77393	0.294004	-6.03368	1.6e-09	8.84e-08	2	cg17903019;cg22399555	Body;Body	shore;shore	-0.275895	hypo	2	-0.275895
PTGIR	57.7644	-3.54169	0.620881	-5.7043	1.17e-08	5.09e-07	2	cg15430294;cg19043207	Body;3'UTR	shore;shelf	-0.393969	hypo	1	-0.295649
RCCD1	291.763	-1.41043	0.25061	-5.62799	1.82e-08	7.57e-07	2	cg01641174;cg13170728	TSS1500;Body	shore;shelf	-0.505634	hypo	1	-0.575815
BUB1B	105.601	-2.45575	0.455424	-5.39222	6.96e-08	2.39e-06	2	cg18039797;cg20918218	Body;Body	opensea;opensea	-0.366606	hypo	2	-0.366606
TMEM132A	62.8369	-2.48196	0.486201	-5.10479	3.31e-07	9.23e-06	2	cg13341995;cg21152628	Body;3'UTR	shore;shelf	-0.230117	hypo	1	-0.230771
RAB26	20.665	-2.45017	0.481556	-5.08803	3.62e-07	9.99e-06	2	cg08790319;cg08958747	Body;Body	shelf;shelf	-0.414677	hypo	2	-0.414677
MACROD1	31.3911	-2.14412	0.42431	-5.05319	4.34e-07	1.17e-05	2	cg06325565;cg17153794	Body;Body	shelf;shelf	-0.276631	hypo	2	-0.276631
ARHGEF17	10.8187	-3.91221	0.77563	-5.04391	4.56e-07	1.22e-05	2	cg02391615;cg06059409	Body;Body	opensea;opensea	-0.493641	hypo	2	-0.493641
RFC2	377.313	-1.12209	0.225447	-4.97719	6.45e-07	1.65e-05	2	cg20764033;cg21828319	Body;3'UTR	opensea;opensea	-0.252752	hypo	1	-0.278277
FHOD3	30.2483	-1.70917	0.347054	-4.92481	8.44e-07	2.1e-05	2	cg16193295;cg24952158	Body;Body	shore;shelf	-0.3262	hypo	2	-0.3262
CD180	994.497	-2.11685	0.43101	-4.91137	9.04e-07	2.22e-05	2	cg14137162;cg18670483	TSS1500;Body	opensea;opensea	-0.477196	hypo	1	-0.546794
TMEM156	768.667	-1.22578	0.2496	-4.91099	9.06e-07	2.22e-05	2	cg14209186;cg25246082	Body;TSS1500	opensea;opensea	-0.461888	hypo	1	-0.363054
CPS1	4.00739	-3.64153	0.754761	-4.82474	1.4e-06	3.22e-05	2	cg11926456;cg21165909	Body;Body	opensea;opensea	-0.343045	hypo	2	-0.343045
TNFRSF18	26.6083	-4.15473	0.869736	-4.777	1.78e-06	3.93e-05	2	cg02709725;cg08090128	TSS1500;Body	shore;shore	-0.326697	hypo	1	-0.350942
APOLD1	69.4886	-1.71695	0.375429	-4.5733	4.8e-06	9.11e-05	2	cg02301528;cg26244225	Body;Body	shore;shore	-0.247987	hypo	2	-0.247987
PART1	3.30021	-6.65727	1.46731	-4.53705	5.7e-06	0.000105401	2	cg18704047;cg24844211	TSS200;Body	opensea;opensea	-0.425087	hypo	1	-0.306147
CC2D2A	21.8716	-1.73346	0.383509	-4.52	6.18e-06	0.000112287	2	cg18797590;cg18993949	Body;Body	opensea;opensea	-0.31501	hypo	2	-0.31501
MCM2	1310.17	-1.22191	0.278648	-4.38513	1.16e-05	0.000190263	2	cg02578470;cg08889930	Body;Body	shelf;shore	-0.331187	hypo	2	-0.331187
DNAH8	21.4295	-3.86713	0.889961	-4.34528	1.39e-05	0.000221743	2	cg14464563;cg24636999	Body;Body	opensea;opensea	-0.334753	hypo	2	-0.334753
MCM3	1668.72	-1.10467	0.257897	-4.28339	1.84e-05	0.000278614	2	cg02243303;cg07418892	Body;TSS1500	shore;shore	-0.517481	hypo	1	-0.513201
TMEM163	30.3447	-2.48753	0.586134	-4.24396	2.2e-05	0.000321977	2	cg00897703;cg25422880	Body;Body	opensea;opensea	-0.338106	hypo	2	-0.338106
PXDN	43.2474	-6.80664	1.61124	-4.22448	2.39e-05	0.000348261	2	cg15914335;cg20311673	Body;Body	shore;shore	-0.234427	hypo	2	-0.234427
PTTG1	171.205	-1.20744	0.295111	-4.09146	4.29e-05	0.000567144	2	cg17367077;cg23024444	Body;TSS1500	shore;shore	-0.305347	hypo	1	-0.292372
SH3RF1	40.5432	-4.55905	1.12187	-4.06379	4.83e-05	0.000624023	2	cg09178384;cg18949666	TSS1500;Body	shore;shelf	-0.467453	hypo	1	-0.370574
LCP1	17263.1	-1.22262	0.308376	-3.96472	7.35e-05	0.000882237	2	cg02479468;cg02696428	Body;5'UTR	opensea;opensea	-0.380363	hypo	1	-0.211291
EPB41L2	438.62	-2.91093	0.744267	-3.91113	9.19e-05	0.00106195	2	cg04599041;cg18884295	Body;Body	opensea;opensea	-0.249598	hypo	2	-0.249598
MYO7B	299.9	-2.76706	0.707652	-3.9102	9.22e-05	0.00106518	2	cg00778928;cg22529396	Body;TSS200	shore;opensea	-0.310026	hypo	1	-0.338104
LIMA1	83.9569	-2.60807	0.667777	-3.90559	9.4e-05	0.0010835	2	cg09920043;cg12892471	Body;Body	opensea;opensea	-0.311956	hypo	2	-0.311956
LPIN1	693.787	-2.30786	0.591011	-3.90494	9.43e-05	0.00108595	2	cg15374751;cg15614119	Body;Body	island;island	-0.222205	hypo	2	-0.222205
PLXNA1	603.836	-1.77014	0.45677	-3.87535	0.000106472	0.00120059	2	cg15608892;cg17552116	Body;Body	opensea;opensea	-0.362752	hypo	2	-0.362752
LOC151174	14.4281	-2.62857	0.67845	-3.87438	0.000106897	0.00120442	2	cg12047086;cg22592643	Body;Body	opensea;opensea	-0.324825	hypo	2	-0.324825
CMTM7	235.619	-2.89691	0.749397	-3.86566	0.000110791	0.00123898	2	cg02806322;cg15872079	Body;Body	shelf;shore	-0.28415	hypo	2	-0.28415
IGF2BP1	1.72076	-4.06056	1.08807	-3.7319	0.000190039	0.00192418	2	cg07017153;cg11783901	Body;Body	opensea;opensea	-0.271726	hypo	2	-0.271726
CRB2	123.31	-1.34698	0.360968	-3.73157	0.000190288	0.00192602	2	cg02010852;cg13430057	TSS200;Body	opensea;shore	-0.386121	hypo	1	-0.249714
SLC39A8	282.417	-1.54951	0.41589	-3.72578	0.000194712	0.00195965	2	cg04660577;cg14579898	TSS1500;Body	shore;opensea	-0.280426	hypo	1	-0.358922
CD200R1	60.9778	-2.04522	0.549028	-3.72517	0.000195181	0.00196289	2	cg02155111;cg10708271	TSS1500;Body	opensea;opensea	-0.654997	hypo	1	-0.519713
PFKFB3	615.231	-1.43234	0.384643	-3.72382	0.000196233	0.00197078	2	cg13316404;cg14999931	Body;Body	shelf;opensea	-0.28551	hypo	2	-0.28551
RACGAP1	282.449	-1.20604	0.324646	-3.71493	0.000203264	0.00202993	2	cg16210078;cg16614527	5'UTR;Body	opensea;opensea	-0.532237	hypo	1	-0.765611
GPR137B	244.097	-1.21641	0.32919	-3.69517	0.000219738	0.00216483	2	cg04077303;cg23035226	Body;Body	shore;opensea	-0.479599	hypo	2	-0.479599
PLXNC1	605.519	-2.00593	0.543607	-3.69004	0.000224223	0.00219989	2	cg07200939;cg24686845	3'UTR;Body	opensea;opensea	-0.4865	hypo	1	-0.319194
BEND5	260.452	-1.10161	0.301293	-3.65627	0.000255908	0.00245575	2	cg11688378;cg20822884	Body;Body	shelf;shore	-0.367426	hypo	2	-0.367426
FAM83F	4.23809	-2.72465	0.745567	-3.65446	0.000257723	0.00246983	2	cg01637537;cg03954858	Body;Body	shore;opensea	-0.261575	hypo	2	-0.261575
RUFY3	1611.74	-1.00114	0.274172	-3.65151	0.000260702	0.00249503	2	cg03173722;cg09215582	Body;Body	opensea;shelf	-0.335458	hypo	2	-0.335458
GSN	406.388	-1.39384	0.384407	-3.62595	0.000287901	0.00269731	2	cg14478589;cg17071957	Body;TSS1500	opensea;opensea	-0.388103	hypo	1	-0.402052
AGBL4	5.7478	-1.68932	0.466836	-3.61865	0.000296139	0.00275906	2	cg16515477;cg21834207	Body;TSS1500	opensea;island	-0.0865035	hypo	1	-0.393416
SLC8A3	5.49234	-3.65716	1.03308	-3.54006	0.000400043	0.00349601	2	cg01862897;cg18296189	Body;Body	opensea;opensea	-0.316469	hypo	2	-0.316469
NAB2	532.949	-1.09518	0.322139	-3.39971	0.000674584	0.00535156	2	cg07134316;cg19466605	Body;3'UTR	opensea;opensea	-0.465757	hypo	1	-0.414879
LOC340357	1.06896	-4.08671	1.21748	-3.3567	0.000788786	0.00608818	2	cg07068655;cg20674212	Body;Body	opensea;opensea	-0.332427	hypo	2	-0.332427
DOCK3	11.1629	-1.5963	0.479617	-3.32829	0.000873809	0.00660624	2	cg05301500;cg19888870	Body;Body	opensea;opensea	-0.403543	hypo	2	-0.403543
GRHL3	1.92181	-2.00075	0.60766	-3.29255	0.000992844	0.00730069	2	cg06376426;cg16734875	TSS1500;Body	island;opensea	-0.369899	hypo	1	-0.491283
TBC1D16	77.2214	-3.78018	1.15765	-3.26538	0.00109316	0.00789183	2	cg00314994;cg07122529	Body;3'UTR	shore;shore	-0.315579	hypo	1	-0.298343
DERL3	1206.74	-1.08829	0.341279	-3.18884	0.00142843	0.00972507	2	cg02293096;cg05386077	3'UTR;Body	shore;shore	-0.253651	hypo	1	-0.262053
HS3ST3B1	22.2111	-2.49812	0.787075	-3.17393	0.0015039	0.0101347	2	cg02228492;cg04665588	Body;Body	opensea;opensea	-0.290064	hypo	2	-0.290064
ABI3BP	8.03556	-1.12859	0.355705	-3.17283	0.00150959	0.0101634	2	cg00709652;cg15626105	Body;Body	opensea;opensea	-0.313124	hypo	2	-0.313124
LTA	44.0556	-1.26838	0.400411	-3.16769	0.00153657	0.010294	2	cg00501919;cg20330447	Body;TSS1500	opensea;opensea	-0.455886	hypo	1	-0.368514
HEG1	523.487	-1.45439	0.463833	-3.13558	0.00171512	0.0112389	2	cg18008247;cg26102819	Body;Body	opensea;opensea	-0.470397	hypo	2	-0.470397
PIF1	74.119	-1.59405	0.513854	-3.10214	0.00192129	0.0122652	2	cg05869754;cg23845646	Body;Body	shore;island	-0.308975	hypo	2	-0.308975
PKDCC	0.986896	-5.15583	1.68182	-3.06562	0.00217217	0.0134653	2	cg21461720;cg22476504	3'UTR;Body	opensea;opensea	-0.276174	hypo	1	-0.326257
OSBPL3	945.23	-1.27508	0.421801	-3.02294	0.00250335	0.0149575	2	cg08379029;cg25279613	Body;5'UTR	opensea;opensea	-0.339204	hypo	1	-0.266021
ME3	6.43089	-2.51522	0.836028	-3.00853	0.00262511	0.0155195	2	cg14883291;cg22266072	TSS1500;Body	shore;opensea	-0.000286625	hypo	1	-0.258423
GPR157	137.068	-1.42172	0.487262	-2.91778	0.00352537	0.0195623	2	cg10108591;cg20284891	TSS1500;Body	shore;opensea	-0.516562	hypo	1	-0.651782
FES	212.421	-1.53932	0.527895	-2.91597	0.00354587	0.0196569	2	cg20992439;cg24888049	Body;TSS1500	shelf;shore	-0.441955	hypo	1	-0.451686
FAM69B	122.474	-1.8324	0.638604	-2.86938	0.00411276	0.0221066	2	cg13587908;cg14149774	Body;3'UTR	shore;shore	-0.379569	hypo	1	-0.338591
LRRC20	31.7168	-1.64619	0.576298	-2.85649	0.00428359	0.0228394	2	cg03505638;cg06219732	Body;Body	opensea;opensea	-0.305588	hypo	2	-0.305588
IL12RB2	29.4991	-1.36416	0.488782	-2.79094	0.00525558	0.026678	2	cg09018107;cg14849855	Body;Body	opensea;opensea	-0.529023	hypo	2	-0.529023
SYNC	0.968921	-2.52253	0.916477	-2.75242	0.00591571	0.0292417	2	cg17339202;cg22350438	Body;Body	opensea;opensea	-0.325441	hypo	2	-0.325441
NHSL1	8.7765	-1.28866	0.470106	-2.74121	0.00612132	0.0300378	2	cg05880829;cg12333043	Body;Body	opensea;opensea	-0.410976	hypo	2	-0.410976
PARP14	8671.74	-1.11838	0.408043	-2.74083	0.00612846	0.0300585	2	cg01721555;cg14750551	Body;Body	shore;shore	-0.458184	hypo	2	-0.458184
FAM53A	31.4011	-1.08524	0.396011	-2.74044	0.00613571	0.0300856	2	cg11721566;cg15763121	Body;3'UTR	shore;shelf	-0.379604	hypo	1	-0.469601
AASS	95.3396	-2.40631	0.880176	-2.7339	0.00625894	0.0305354	2	cg03238396;cg11738782	Body;Body	opensea;opensea	-0.325874	hypo	2	-0.325874
ABLIM2	27.5046	-1.85924	0.68568	-2.71153	0.00669732	0.0319997	2	cg13130338;cg19588649	Body;Body	shelf;opensea	-0.263413	hypo	2	-0.263413
NPY6R	30.4581	-1.61657	0.611728	-2.64262	0.00822672	0.037465	2	cg00813373;cg14689979	Body;Body	opensea;opensea	-0.339994	hypo	2	-0.339994
CX3CL1	0.892729	-4.40815	1.67361	-2.63391	0.00844082	0.0381511	2	cg06166915;cg15195412	Body;Body	shore;opensea	-0.47955	hypo	2	-0.47955
DLG5	27.0176	-2.11305	0.816801	-2.58699	0.0096819	0.0424162	2	cg05112070;cg11778714	Body;Body	opensea;opensea	-0.314013	hypo	2	-0.314013
MFAP5	0.52615	-4.07999	1.58262	-2.578	0.00993753	0.0432698	2	cg12690978;cg24229691	Body;TSS200	opensea;opensea	-0.348298	hypo	1	-0.491878
SMAD6	0.974384	-2.85047	1.10684	-2.57531	0.0100149	0.0435196	2	cg01678084;cg16553757	Body;Body	opensea;opensea	-0.446615	hypo	2	-0.446615
FAM173A	184.272	-1.54231	0.600914	-2.5666	0.0102701	0.0443651	2	cg09830866;cg10254923	Body;TSS1500	island;shore	-0.221705	hypo	1	-0.236556
IQCA1	2.34823	-4.16234	1.64051	-2.53723	0.0111734	0.0473126	2	cg14035807;cg17316300	3'UTR;Body	opensea;opensea	-0.299603	hypo	1	-0.317984
MLXIPL	0.683032	-2.33149	0.926218	-2.51721	0.0118287	0.0493677	2	cg02382795;cg05007097	Body;3'UTR	shore;opensea	-0.267231	hypo	1	-0.24597
CDT1	49.5565	-5.11852	0.460355	-11.1186	1.02e-28	1.45e-25	1	cg08255475	Body	shore	-0.500378	hypo	1	-0.500378
NCAPG	58.3847	-3.54816	0.39702	-8.93698	4e-19	1.52e-16	1	cg02810967	Body	shore	-0.33349	hypo	1	-0.33349
DIAPH3	13.3152	-5.46246	0.647974	-8.43006	3.45e-17	9.37e-15	1	cg05170711	Body	opensea	-0.732803	hypo	1	-0.732803
CCNF	151.69	-2.13246	0.282614	-7.5455	4.51e-14	6.9e-12	1	cg00743849	Body	opensea	-0.319498	hypo	1	-0.319498
PLK1	92.777	-2.25935	0.308495	-7.32379	2.41e-13	3.21e-11	1	cg06112560	Body	shore	-0.408583	hypo	1	-0.408583
DNMT1	2317.17	-1.327	0.189862	-6.98927	2.76e-12	2.94e-10	1	cg21063296	Body	shore	-0.354706	hypo	1	-0.354706
GBGT1	98.1364	-2.00854	0.287695	-6.98147	2.92e-12	3.08e-10	1	cg04703696	Body	shore	-0.412593	hypo	1	-0.412593
HECW2	8.03207	-4.22057	0.617401	-6.83603	8.14e-12	7.94e-10	1	cg02514318	Body	opensea	-0.280594	hypo	1	-0.280594
CLSPN	47.1488	-3.84244	0.564823	-6.80291	1.03e-11	9.83e-10	1	cg00393247	Body	shore	-0.252843	hypo	1	-0.252843
MCM7	2989.03	-1.08256	0.159938	-6.76859	1.3e-11	1.2e-09	1	cg04331960	Body	opensea	-0.299559	hypo	1	-0.299559
ASB13	87.472	-4.85241	0.721631	-6.72423	1.77e-11	1.57e-09	1	cg25310700	Body	opensea	-0.37352	hypo	1	-0.37352
NCAPH	41.1506	-3.7782	0.576698	-6.55144	5.7e-11	4.51e-09	1	cg03147185	Body	opensea	-0.341152	hypo	1	-0.341152
OGG1	586.726	-1.81095	0.284895	-6.35656	2.06e-10	1.42e-08	1	cg12684175	Body	shelf	-0.340372	hypo	1	-0.340372
SLC34A3	8.68028	-2.65162	0.427043	-6.20927	5.32e-10	3.33e-08	1	cg05036153	Body	shore	-0.328124	hypo	1	-0.328124
C1orf74	24.8751	-1.92266	0.315477	-6.09445	1.1e-09	6.33e-08	1	cg00638574	Body	shore	-0.252096	hypo	1	-0.252096
TERT	6.83088	-6.20236	1.02465	-6.05315	1.42e-09	7.98e-08	1	cg16051228	Body	island	-0.228059	hypo	1	-0.228059
EEPD1	25.3136	-5.94447	0.98625	-6.02734	1.67e-09	9.14e-08	1	cg12770539	Body	opensea	-0.369427	hypo	1	-0.369427
C22orf34	208.984	-1.83082	0.307215	-5.9594	2.53e-09	1.33e-07	1	cg06355422	Body	shelf	-0.640217	hypo	1	-0.640217
CD22	13323.5	-1.99874	0.338192	-5.91009	3.42e-09	1.71e-07	1	cg23467944	Body	opensea	-0.246674	hypo	1	-0.246674
DACT3	8.20853	-3.85702	0.661675	-5.82918	5.57e-09	2.61e-07	1	cg22981158	Body	shelf	-0.487017	hypo	1	-0.487017
INCENP	454.6	-1.01818	0.175178	-5.81227	6.16e-09	2.87e-07	1	cg13883397	Body	opensea	-0.609026	hypo	1	-0.609026
RRP1	361.004	-1.10798	0.193834	-5.71612	1.09e-08	4.79e-07	1	cg23837804	Body	shelf	-0.485665	hypo	1	-0.485665
SERP2	2.08894	-5.77106	1.03361	-5.58338	2.36e-08	9.45e-07	1	cg01154353	Body	opensea	-0.383157	hypo	1	-0.383157
SPPL2B	2299.32	-1.64237	0.296643	-5.53651	3.09e-08	1.18e-06	1	cg02370644	Body	island	-0.299906	hypo	1	-0.299906
C3orf67	16.3072	-6.19662	1.12345	-5.51573	3.47e-08	1.32e-06	1	cg15028458	Body	opensea	-0.374684	hypo	1	-0.374684
CACNA1E	21.2311	-4.08723	0.746774	-5.47317	4.42e-08	1.6e-06	1	cg26259818	Body	opensea	-0.344346	hypo	1	-0.344346
SPATC1	13.3097	-3.25277	0.597473	-5.44421	5.2e-08	1.86e-06	1	cg04496906	Body	shore	-0.321279	hypo	1	-0.321279
NRM	20.6455	-2.62376	0.483272	-5.42916	5.66e-08	1.99e-06	1	cg20800391	Body	shore	-0.288479	hypo	1	-0.288479
CLIP2	317.263	-3.42383	0.639569	-5.35334	8.63e-08	2.88e-06	1	cg07814763	Body	opensea	-0.447053	hypo	1	-0.447053
GRIP2	3.14956	-3.71267	0.710155	-5.22797	1.71e-07	5.2e-06	1	cg24845998	Body	opensea	-0.356667	hypo	1	-0.356667
C9orf139	15.7019	-4.39711	0.842992	-5.21608	1.83e-07	5.5e-06	1	cg02679745	Body	shore	-0.323423	hypo	1	-0.323423
ENAH	22.5392	-4.75703	0.91418	-5.2036	1.95e-07	5.8e-06	1	cg21410954	Body	opensea	-0.350167	hypo	1	-0.350167
ELL3	37.1139	-2.1552	0.417083	-5.16733	2.37e-07	6.86e-06	1	cg23253752	Body	shore	-0.509794	hypo	1	-0.509794
FGD2	5182.83	-1.37977	0.26786	-5.1511	2.59e-07	7.39e-06	1	cg07541160	Body	opensea	-0.315003	hypo	1	-0.315003
SLC43A1	135.573	-2.0692	0.412551	-5.01562	5.29e-07	1.38e-05	1	cg27315497	Body	shore	-0.383006	hypo	1	-0.383006
RRAGD	48.6567	-2.61316	0.521892	-5.00708	5.53e-07	1.44e-05	1	cg10675614	Body	shore	-0.46409	hypo	1	-0.46409
RFX2	35.6668	-2.353	0.484124	-4.86033	1.17e-06	2.77e-05	1	cg25741259	Body	shore	-0.243187	hypo	1	-0.243187
CYGB	7.96798	-2.80234	0.577615	-4.85157	1.22e-06	2.88e-05	1	cg24126567	Body	opensea	-0.296004	hypo	1	-0.296004
SLC2A6	699.348	-1.75133	0.361309	-4.84717	1.25e-06	2.93e-05	1	cg13410614	Body	shore	-0.337587	hypo	1	-0.337587
YIF1B	308.751	-1.19214	0.248604	-4.79532	1.62e-06	3.65e-05	1	cg02993606	Body	shelf	-0.287106	hypo	1	-0.287106
RHBDF2	2458.93	-1.73042	0.368752	-4.69263	2.7e-06	5.63e-05	1	cg21486834	Body	shelf	-0.429951	hypo	1	-0.429951
LOC100134368	28.5048	-1.95048	0.425351	-4.58558	4.53e-06	8.67e-05	1	cg07492924	Body	shore	-0.238677	hypo	1	-0.238677
TJP3	17.6141	-1.69752	0.371085	-4.57448	4.77e-06	9.06e-05	1	cg27022827	Body	shore	-0.298254	hypo	1	-0.298254
XYLB	9.13391	-2.40964	0.530502	-4.54219	5.57e-06	0.000103263	1	cg12340144	Body	shore	-0.296111	hypo	1	-0.296111
MYBPC3	41.4664	-1.64269	0.368078	-4.46288	8.09e-06	0.000140217	1	cg03778108	Body	island	-0.36534	hypo	1	-0.36534
LIX1	48.6185	-4.95109	1.11327	-4.44735	8.69e-06	0.000149561	1	cg10420838	Body	opensea	-0.340204	hypo	1	-0.340204
KLHL17	190.729	-1.24499	0.280615	-4.43664	9.14e-06	0.000156158	1	cg07582955	Body	island	-0.241286	hypo	1	-0.241286
TACR1	10.4104	-2.36515	0.537944	-4.39665	1.1e-05	0.000181984	1	cg26876914	Body	opensea	-0.20879	hypo	1	-0.20879
PLEKHH1	20.7266	-1.8585	0.424122	-4.38199	1.18e-05	0.000192878	1	cg16576052	Body	island	-0.250736	hypo	1	-0.250736
GHRL	40.4964	-1.59595	0.370557	-4.30688	1.66e-05	0.000255516	1	cg00856825	Body	opensea	-0.258397	hypo	1	-0.258397
DISP2	40.9886	-1.57361	0.368013	-4.27595	1.9e-05	0.000286862	1	cg17018786	Body	shore	-0.205261	hypo	1	-0.205261
GRIN2D	2.7824	-2.29574	0.536977	-4.27531	1.91e-05	0.000287484	1	cg24030173	Body	shelf	-0.222099	hypo	1	-0.222099
CADM3	2.6415	-4.73345	1.10792	-4.2724	1.93e-05	0.000290556	1	cg16109680	Body	shelf	-0.35744	hypo	1	-0.35744
PAOX	203.18	-1.24432	0.291492	-4.26881	1.97e-05	0.000294028	1	cg08800869	Body	shore	-0.325614	hypo	1	-0.325614
EBI3	38.2005	-4.66648	1.11284	-4.19332	2.75e-05	0.000389987	1	cg16592658	Body	opensea	-0.409878	hypo	1	-0.409878
ECT2L	21.9737	-1.32715	0.317268	-4.18304	2.88e-05	0.000404902	1	cg27534534	Body	opensea	-0.303009	hypo	1	-0.303009
KCNMB4	44.0891	-2.11413	0.508359	-4.15873	3.2e-05	0.000440807	1	cg04609875	Body	shelf	-0.42654	hypo	1	-0.42654
PXMP2	38.1081	-1.39383	0.347639	-4.00943	6.09e-05	0.000755995	1	cg01226748	Body	opensea	-0.332001	hypo	1	-0.332001
SLC4A9	3.34846	-3.0378	0.759937	-3.99744	6.4e-05	0.000787449	1	cg07521929	Body	shore	-0.367742	hypo	1	-0.367742
ZC3HAV1L	16.8499	-2.39393	0.601837	-3.9777	6.96e-05	0.000844201	1	cg05576245	Body	shore	-0.294893	hypo	1	-0.294893
LBR	2301.31	-1.04081	0.264101	-3.94095	8.12e-05	0.000955647	1	cg03048947	Body	shelf	-0.316983	hypo	1	-0.316983
DOK7	48.7811	-3.62352	0.920601	-3.93603	8.28e-05	0.000973417	1	cg06943431	Body	shore	-0.268132	hypo	1	-0.268132
KIF7	4.9491	-3.59101	0.917564	-3.91363	9.09e-05	0.00105187	1	cg12762600	Body	shore	-0.284431	hypo	1	-0.284431
HAGHL	213.23	-1.37559	0.353366	-3.89283	9.91e-05	0.00113067	1	cg12981843	Body	island	-0.296312	hypo	1	-0.296312
SEC14L2	34.965	-1.76526	0.45386	-3.88944	0.000100475	0.00114383	1	cg19015086	Body	shore	-0.558595	hypo	1	-0.558595
TNFSF4	61.7933	-1.62137	0.418742	-3.872	0.000107947	0.00121337	1	cg24633390	Body	opensea	-0.320067	hypo	1	-0.320067
ABCA12	6.60596	-2.33944	0.605645	-3.86273	0.000112127	0.0012495	1	cg11970703	Body	opensea	-0.483566	hypo	1	-0.483566
LMNB2	762.952	-1.3734	0.356145	-3.85631	0.000115113	0.00127728	1	cg05641348	Body	shore	-0.466034	hypo	1	-0.466034
SLC45A1	3.34178	-3.08564	0.801972	-3.84757	0.000119296	0.00131498	1	cg08644356	Body	shore	-0.544155	hypo	1	-0.544155
ADAM23	12.7511	-5.32889	1.38512	-3.84725	0.00011945	0.00131588	1	cg04371413	Body	opensea	-0.236421	hypo	1	-0.236421
GREB1	5.9771	-1.96994	0.513097	-3.83932	0.000123374	0.00135156	1	cg24737570	Body	opensea	-0.26096	hypo	1	-0.26096
DOK1	369.77	-1.20579	0.315557	-3.82115	0.000132828	0.00143525	1	cg22989958	Body	shore	-0.453557	hypo	1	-0.453557
BTBD18	29.6217	-1.88384	0.49307	-3.82064	0.000133108	0.00143561	1	cg06094113	Body	shelf	-0.268475	hypo	1	-0.268475
PRUNE2	21.8478	-4.1676	1.09342	-3.81154	0.000138104	0.00147823	1	cg14182496	Body	opensea	-0.26848	hypo	1	-0.26848
GEMIN6	146.866	-1.13708	0.298724	-3.80644	0.000140979	0.00150167	1	cg24047736	Body	opensea	-0.306275	hypo	1	-0.306275
SLFN12L	209.928	1.76951	0.466079	3.79658	0.000146707	0.00155165	1	cg18470427	Body	opensea	0.220492	hyper	1	0.220492
AMZ1	92.0321	-1.21337	0.322561	-3.76168	0.000168776	0.00174996	1	cg02156692	Body	opensea	-0.418813	hypo	1	-0.418813
TIMM8B	98.8604	-1.13161	0.303351	-3.73036	0.000191207	0.00193257	1	cg19537591	Body	shore	-0.278222	hypo	1	-0.278222
BCL2L1	503.767	-1.20203	0.325333	-3.69477	0.000220082	0.00216598	1	cg08257293	Body	shelf	-0.362389	hypo	1	-0.362389
PPP1R14C	1.53999	-4.80125	1.30148	-3.68908	0.000225071	0.00220668	1	cg26849637	Body	opensea	-0.2133	hypo	1	-0.2133
LMTK3	5.89657	-2.20202	0.61004	-3.60963	0.000306629	0.00283085	1	cg06862049	Body	island	-0.240619	hypo	1	-0.240619
NEK10	9.28443	-2.47888	0.692008	-3.58216	0.000340766	0.00308499	1	cg07047471	Body	opensea	-0.39476	hypo	1	-0.39476
CCDC151	4.90977	-2.38868	0.673284	-3.5478	0.000388462	0.00341683	1	cg27646205	Body	shore	-0.369956	hypo	1	-0.369956
ST6GALNAC2	8.57524	-2.09214	0.594007	-3.52208	0.000428182	0.00369991	1	cg24321297	Body	shelf	-0.408635	hypo	1	-0.408635
IL17C	18.0112	-1.54846	0.444587	-3.48293	0.000495966	0.00416621	1	cg05463589	Body	island	-0.277266	hypo	1	-0.277266
IL17RE	8.18865	-1.55608	0.453722	-3.42958	0.000604507	0.00492644	1	cg06619959	Body	shore	-0.386555	hypo	1	-0.386555
AGAP2	533.297	-1.06527	0.312901	-3.4045	0.000662857	0.0052806	1	cg07159847	Body	shore	-0.302346	hypo	1	-0.302346
C17orf51	40.3318	-1.67145	0.494912	-3.37727	0.000732087	0.00571381	1	cg17529235	Body	shelf	-0.30845	hypo	1	-0.30845
CLN8	1042.3	-1.02049	0.302574	-3.37269	0.000744371	0.00579697	1	cg16317553	Body	opensea	-0.498972	hypo	1	-0.498972
BMP6	175.323	2.3554	0.700324	3.36331	0.000770149	0.00596509	1	cg07747616	Body	shore	0.259162	hyper	1	0.259162
CDC7	235.312	-1.09677	0.327684	-3.34704	0.000816785	0.00625652	1	cg01782024	Body	opensea	-0.235787	hypo	1	-0.235787
SLC16A11	38.2461	-1.7078	0.510748	-3.34373	0.000826612	0.00631312	1	cg05031424	Body	shore	-0.672731	hypo	1	-0.672731
MND1	12.8576	-2.26564	0.691796	-3.27501	0.00105659	0.00767819	1	cg12614529	Body	shelf	-0.343058	hypo	1	-0.343058
LOC153684	186.971	-1.02391	0.314511	-3.25555	0.00113173	0.00810022	1	cg24921186	Body	shore	-0.20949	hypo	1	-0.20949
PADI2	39.7461	-3.44659	1.05922	-3.25388	0.0011384	0.00813525	1	cg06746829	Body	opensea	-0.429442	hypo	1	-0.429442
GAMT	57.9647	-1.77633	0.549364	-3.23343	0.00122314	0.00860944	1	cg09507386	Body	island	-0.217998	hypo	1	-0.217998
MME	66.9222	-4.44871	1.38821	-3.20464	0.0013523	0.00929569	1	cg27235955	Body	opensea	-0.237033	hypo	1	-0.237033
PATE4	1.05784	-3.87276	1.22418	-3.16356	0.00155851	0.0104121	1	cg22329515	Body	opensea	-0.326019	hypo	1	-0.326019
NET1	125.706	-2.17846	0.689582	-3.15911	0.00158254	0.01053	1	cg18717067	Body	shelf	-0.585095	hypo	1	-0.585095
COL6A6	3.71879	-1.97948	0.628921	-3.14743	0.00164715	0.0108509	1	cg13067649	Body	opensea	-0.254121	hypo	1	-0.254121
DAAM1	633.276	-1.02481	0.329415	-3.11099	0.00186463	0.0119681	1	cg12126243	Body	opensea	-0.653229	hypo	1	-0.653229
SARDH	3.87545	-2.52833	0.812956	-3.11004	0.00187063	0.0119936	1	cg13644300	Body	opensea	-0.339553	hypo	1	-0.339553
ENDOG	17.3876	-2.18994	0.705683	-3.10329	0.00191382	0.0122285	1	cg13630871	Body	shore	-0.368918	hypo	1	-0.368918
DCAF12	241.881	-2.13969	0.693676	-3.08456	0.00203852	0.0128207	1	cg14412639	Body	opensea	-0.423973	hypo	1	-0.423973
ADCY1	7.72684	-2.1756	0.713437	-3.04947	0.00229248	0.0139858	1	cg25322847	Body	shelf	-0.326189	hypo	1	-0.326189
C12orf75	72.3046	-2.20001	0.724448	-3.03681	0.00239097	0.014432	1	cg26459229	Body	opensea	-0.237891	hypo	1	-0.237891
JUP	463.131	-2.75822	0.912943	-3.02124	0.00251739	0.0150105	1	cg15386103	Body	shore	-0.505513	hypo	1	-0.505513
NTNG1	98.5619	-1.56926	0.522825	-3.0015	0.0026865	0.0157939	1	cg24343913	Body	opensea	-0.228901	hypo	1	-0.228901
RET	4.39504	-1.63964	0.551904	-2.97088	0.00296951	0.0171288	1	cg02780029	Body	opensea	-0.415231	hypo	1	-0.415231
CHRNB2	17.1558	-1.66236	0.560835	-2.96409	0.00303582	0.0174547	1	cg24498305	Body	shore	-0.233468	hypo	1	-0.233468
DUSP7	119.634	-1.26968	0.429827	-2.95393	0.00313757	0.0179024	1	cg05504759	Body	shelf	-0.373806	hypo	1	-0.373806
TEKT5	5.21048	-1.45589	0.496978	-2.92947	0.00339536	0.0190525	1	cg03146733	Body	opensea	-0.202458	hypo	1	-0.202458
OTUD7A	1.02598	-3.67398	1.26598	-2.90207	0.00370705	0.0203954	1	cg04967982	Body	opensea	-0.31612	hypo	1	-0.31612
ABHD8	97.1737	-1.35073	0.471565	-2.86436	0.00417849	0.0223754	1	cg17941109	Body	shore	-0.332388	hypo	1	-0.332388
CARD9	56.1531	-1.46898	0.516592	-2.8436	0.00446068	0.0235499	1	cg13572237	Body	shore	-0.203798	hypo	1	-0.203798
MYH11	235.669	-1.00311	0.352902	-2.84246	0.00447668	0.0236142	1	cg26515755	Body	opensea	-0.332838	hypo	1	-0.332838
TBC1D4	132.958	-2.87374	1.02466	-2.80457	0.00503834	0.0258425	1	cg24425149	Body	opensea	-0.391396	hypo	1	-0.391396
VWA1	0.629782	-4.94969	1.76698	-2.80121	0.00509114	0.0260616	1	cg26798702	Body	shore	-0.273841	hypo	1	-0.273841
CCDC136	71.2382	-1.11932	0.399578	-2.80126	0.00509039	0.0260616	1	cg12030788	Body	shelf	-0.318132	hypo	1	-0.318132
CP	28.3836	-1.13511	0.405698	-2.79793	0.00514319	0.0262714	1	cg24876069	Body	opensea	-0.643119	hypo	1	-0.643119
SLC37A2	137.11	-1.26511	0.466065	-2.71444	0.00663884	0.031795	1	cg03800939	Body	shore	-0.308376	hypo	1	-0.308376
SPNS2	25.7908	-1.23865	0.461959	-2.68131	0.00733343	0.0342203	1	cg04864453	Body	opensea	-0.353092	hypo	1	-0.353092
A2ML1	1.81581	-2.26573	0.863353	-2.62434	0.00868181	0.0390318	1	cg13209739	Body	opensea	-0.205312	hypo	1	-0.205312
TMCC2	38.8419	-1.56937	0.601133	-2.61068	0.00903617	0.0401996	1	cg21643547	Body	shore	-0.258723	hypo	1	-0.258723
DNAI1	1.40216	-1.65512	0.635037	-2.60634	0.00915148	0.0406157	1	cg13397818	Body	shelf	-0.303005	hypo	1	-0.303005
TSHR	4.32056	-1.56678	0.60717	-2.58046	0.00986693	0.0430265	1	cg12196847	Body	opensea	-0.579321	hypo	1	-0.579321
SCIN	3.359	-3.4769	1.34969	-2.57607	0.00999304	0.0434517	1	cg19015997	Body	shore	-0.221272	hypo	1	-0.221272
DBP	297.503	-1.01456	0.398511	-2.54587	0.0109005	0.0463949	1	cg15439033	Body	shore	-0.336154	hypo	1	-0.336154
KHK	23.5526	-1.04404	0.410407	-2.54392	0.0109616	0.0465888	1	cg05505545	Body	shelf	-0.222597	hypo	1	-0.222597
PDE6A	3.16936	-1.59269	0.632919	-2.51642	0.0118554	0.0494285	1	cg09646173	Body	opensea	-0.428864	hypo	1	-0.428864

## Sheet: Supplementary Table S8B
DMEGs with DMPs in body regions all negative with expression (N= 326)
symbol	baseMean	log2FoldChange	lfcSE	stat	pvalue	padj	DMP_num	DMP_sites	DMP_features	DMP_cgi	DMP_average_deltaBeta	DMP_body_status	DMP_body_num	DMP_body_average_deltabeta
FOXP1	16479.3	1.52463	0.206731	7.37492	1.64e-13	2.25e-11	33	cg00052246;cg00970757;cg02220284;cg02336104;cg05098381;cg05384123;cg06033488;cg06241812;cg06691963;cg07278181;cg07368857;cg07644184;cg08173709;cg09459774;cg10452974;cg13726313;cg14564722;cg15472885;cg15871371;cg16320427;cg16510530;cg16697896;cg19402876;cg19628600;cg19776833;cg21379733;cg21423741;cg22798400;cg22828884;cg23830205;cg24864984;cg25481160;cg26344024	Body;Body;Body;5'UTR;5'UTR;5'UTR;Body;5'UTR;Body;5'UTR;5'UTR;5'UTR;Body;5'UTR;5'UTR;Body;5'UTR;Body;5'UTR;Body;Body;Body;Body;Body;Body;Body;Body;Body;Body;Body;Body;Body;5'UTR	opensea;opensea;opensea;opensea;opensea;opensea;opensea;opensea;opensea;opensea;opensea;opensea;opensea;opensea;opensea;opensea;opensea;opensea;opensea;opensea;opensea;opensea;opensea;opensea;opensea;opensea;opensea;opensea;opensea;opensea;opensea;shelf;opensea	-0.468254	hypo	21	-0.535035
ZFPM1	1211.22	1.54506	0.472904	3.26717	0.00108629	0.00785792	21	cg00216061;cg00352652;cg00652332;cg01278564;cg02232529;cg03080043;cg03310838;cg04160201;cg04940214;cg05067156;cg05142677;cg05446615;cg06212670;cg06928887;cg08374494;cg08466082;cg08478121;cg09789939;cg10195726;cg26899496;cg27362718	Body;Body;Body;Body;Body;Body;Body;Body;Body;Body;3'UTR;Body;Body;Body;Body;Body;Body;Body;Body;Body;Body	opensea;opensea;shore;shelf;shelf;shelf;opensea;opensea;opensea;shore;island;opensea;shelf;opensea;shelf;shelf;opensea;opensea;shore;shelf;opensea	-0.438194	hypo	20	-0.446391
SEPT9	24894.3	1.16823	0.325153	3.59288	0.000327046	0.0029841	20	cg01513063;cg02397064;cg05626616;cg06380320;cg06622199;cg07324245;cg10997810;cg13061373;cg14608550;cg17053854;cg17112975;cg17922695;cg18278424;cg19422205;cg19654743;cg20557159;cg20688185;cg20923885;cg21808045;cg26079706	Body;Body;Body;Body;Body;Body;Body;5'UTR;5'UTR;Body;Body;Body;Body;Body;TSS200;Body;5'UTR;Body;Body;Body	opensea;opensea;opensea;shore;opensea;shore;opensea;opensea;shore;opensea;opensea;shelf;opensea;opensea;shore;shelf;opensea;opensea;opensea;opensea	-0.349184	hypo	16	-0.353422
VOPP1	9740.16	2.50071	0.261326	9.56932	1.08e-21	7.13e-19	16	cg05170183;cg05391282;cg06750076;cg06889086;cg07459478;cg09286421;cg12015615;cg13860281;cg14876996;cg15599795;cg15902297;cg16182302;cg16248926;cg23654401;cg24430703;cg26106590	Body;Body;Body;Body;Body;Body;Body;Body;Body;Body;Body;Body;Body;Body;Body;TSS1500	opensea;opensea;opensea;shore;opensea;opensea;opensea;shore;opensea;opensea;opensea;opensea;opensea;opensea;opensea;shore	-0.527266	hypo	15	-0.529018
MSI2	9046.54	1.16467	0.316173	3.68366	0.00022991	0.0022464	11	cg05251593;cg06247967;cg10249814;cg12430029;cg13790810;cg13916877;cg14480531;cg18052713;cg22233512;cg24158482;cg25373624	Body;Body;Body;Body;Body;Body;Body;Body;Body;Body;Body	opensea;opensea;opensea;opensea;opensea;opensea;opensea;opensea;opensea;opensea;opensea	-0.408356	hypo	11	-0.408356
RBMS3	169.603	5.56794	1.75483	3.17291	0.00150917	0.010163	10	cg01334717;cg02556363;cg02578184;cg05293299;cg11863854;cg16258657;cg16565002;cg22494026;cg25834692;cg26082870	Body;Body;Body;Body;Body;Body;Body;Body;Body;Body	opensea;opensea;opensea;opensea;opensea;opensea;opensea;opensea;opensea;opensea	-0.307731	hypo	10	-0.307731
FARP1	727.426	2.04013	0.653905	3.11991	0.00180907	0.0116878	10	cg02183491;cg05756754;cg09809402;cg10672164;cg15185986;cg16450249;cg18252102;cg24785526;cg25448281;cg26531286	3'UTR;Body;3'UTR;5'UTR;Body;Body;5'UTR;Body;3'UTR;5'UTR	opensea;opensea;opensea;opensea;opensea;opensea;shore;opensea;opensea;shelf	-0.390697	hypo	4	-0.389869
PPP2R2B	7.2849	4.26879	1.39035	3.0703	0.00213842	0.0133013	10	cg02154084;cg03653855;cg05576845;cg08715720;cg08991927;cg12524428;cg13301454;cg15021031;cg17342759;cg18899516	Body;5'UTR;Body;Body;5'UTR;5'UTR;Body;5'UTR;TSS1500;Body	opensea;opensea;opensea;opensea;opensea;opensea;opensea;opensea;opensea;opensea	-0.368383	hypo	5	-0.319765
APBA2	19.6911	5.16856	1.33639	3.86754	0.000109939	0.00123299	9	cg01863596;cg02331808;cg07148167;cg07699300;cg08908089;cg12395299;cg15885043;cg23914328;cg27184903	Body;5'UTR;Body;Body;TSS1500;Body;Body;Body;5'UTR	opensea;opensea;shelf;shelf;opensea;opensea;opensea;shelf;opensea	-0.306197	hypo	6	-0.299485
PCDHGA4	6.55612	-3.12666	1.10143	-2.83872	0.00452944	0.0238157	9	cg02161292;cg02707176;cg03892308;cg07539798;cg14472390;cg14566959;cg15672768;cg17451176;cg25126698	Body;Body;Body;Body;Body;Body;Body;Body;Body	island;island;shore;island;shore;island;island;shore;island	0.228197	hyper	9	0.228197
ROR1	2649.69	5.01299	0.427663	11.7218	9.85e-32	2.34e-28	8	cg00327437;cg03140289;cg03937361;cg03950655;cg06743782;cg07579123;cg07797372;cg24502478	Body;Body;Body;Body;Body;Body;Body;TSS1500	opensea;opensea;opensea;opensea;opensea;opensea;opensea;shore	-0.4029	hypo	7	-0.413107
TIMP2	1592.56	2.64869	0.427094	6.20166	5.59e-10	3.47e-08	8	cg00689612;cg03642503;cg04397137;cg06233930;cg08749351;cg12125614;cg24211657;cg26963090	Body;Body;Body;Body;Body;Body;Body;Body	shelf;shore;opensea;shelf;shelf;opensea;opensea;opensea	-0.341662	hypo	8	-0.341662
PRDM2	24520.2	1.58608	0.288944	5.48922	4.04e-08	1.49e-06	8	cg07708453;cg11750706;cg19359071;cg23267665;cg24715767;cg25402049;cg25450806;cg26063625	1stExon;Body;TSS1500;TSS1500;Body;TSS1500;1stExon;Body	opensea;shore;shelf;shelf;opensea;shelf;opensea;shore	-0.439301	hypo	3	-0.422582
DLG2	467.781	3.41714	0.652559	5.23653	1.64e-07	4.99e-06	8	cg02675969;cg04923194;cg05174766;cg05405389;cg08432013;cg18023263;cg22907295;cg23424158	Body;TSS1500;Body;Body;Body;Body;Body;TSS1500	opensea;opensea;opensea;opensea;opensea;opensea;opensea;opensea	-0.385423	hypo	6	-0.353187
ABR	8185.17	1.16966	0.243601	4.80154	1.57e-06	3.57e-05	8	cg00025496;cg10687217;cg11149849;cg12799029;cg14335816;cg18831134;cg20497635;cg27230984	Body;5'UTR;Body;Body;Body;5'UTR;Body;Body	opensea;shore;island;shelf;opensea;shore;opensea;shore	-0.356798	hypo	6	-0.360576
IPCEF1	239.942	3.00744	0.700042	4.29609	1.74e-05	0.000265815	8	cg02864954;cg10276116;cg14295437;cg19690214;cg19963522;cg24635109;cg24873280;cg26415516	Body;Body;5'UTR;TSS1500;5'UTR;5'UTR;5'UTR;3'UTR	opensea;opensea;opensea;opensea;opensea;opensea;opensea;opensea	-0.626115	hypo	2	-0.770327
AHNAK	118212	1.24169	0.29221	4.2493	2.14e-05	0.000316017	8	cg05427381;cg06219806;cg09183450;cg13282971;cg14171514;cg16509239;cg23447569;cg26484813	5'UTR;5'UTR;5'UTR;5'UTR;5'UTR;Body;TSS1500;5'UTR	shelf;opensea;opensea;shelf;opensea;shore;shore;shore	-0.415199	hypo	1	-0.253286
COL4A2	28.7755	2.01856	0.765178	2.63803	0.008339	0.0378351	8	cg19520280;cg20450058;cg20553577;cg21005369;cg24371954;cg24995674;cg25205321;cg26743132	Body;Body;Body;Body;Body;Body;Body;Body	opensea;opensea;opensea;opensea;opensea;opensea;opensea;shore	-0.348267	hypo	8	-0.348267
RPL23A	7336.54	2.75587	0.234909	11.7316	8.77e-32	2.27e-28	7	cg02650512;cg14173815;cg15036326;cg16257607;cg16565409;cg17408380;cg20927567	Body;Body;Body;Body;Body;Body;Body	shore;shelf;shore;shelf;shore;shore;shelf	-0.463346	hypo	7	-0.463346
SPATS2L	908.754	5.00953	0.553003	9.05877	1.32e-19	5.61e-17	7	cg03035167;cg04945753;cg06226703;cg06240652;cg13144059;cg14106933;cg24151841	Body;Body;5'UTR;Body;5'UTR;5'UTR;Body	opensea;opensea;opensea;opensea;opensea;opensea;opensea	-0.626302	hypo	4	-0.611009
CREB3L2	9110.09	2.67843	0.344268	7.78007	7.25e-15	1.29e-12	7	cg04472009;cg05041511;cg05723179;cg09271097;cg15975598;cg18091615;cg23697157	Body;Body;Body;Body;Body;Body;Body	shelf;opensea;opensea;opensea;opensea;opensea;opensea	-0.600594	hypo	7	-0.600594
TIGIT	816.344	2.69306	0.452389	5.95297	2.63e-09	1.38e-07	7	cg09246203;cg13669740;cg19421218;cg19456938;cg20832020;cg22577252;cg22870429	Body;5'UTR;TSS200;TSS200;1stExon;TSS1500;3'UTR	opensea;opensea;opensea;opensea;opensea;opensea;opensea	-0.586218	hypo	1	-0.587908
TRAM2	3139.67	1.35492	0.234292	5.78305	7.34e-09	3.34e-07	7	cg00171729;cg08966889;cg11998049;cg15807046;cg18397730;cg22388471;cg26020069	Body;Body;Body;Body;Body;3'UTR;Body	opensea;shore;shore;shelf;shelf;opensea;opensea	-0.396435	hypo	6	-0.374798
SNX18	4859.36	2.10316	0.410848	5.11907	3.07e-07	8.63e-06	7	cg01582396;cg08544436;cg14684434;cg14952488;cg16358034;cg21995347;cg23001370	Body;1stExon;Body;Body;1stExon;1stExon;Body	shelf;island;opensea;opensea;island;island;shore	-0.555558	hypo	4	-0.604512
CPEB4	4009.58	1.21001	0.292334	4.13915	3.49e-05	0.000473524	7	cg03032025;cg06889108;cg12665414;cg16290431;cg18693985;cg18757087;cg25122699	1stExon;1stExon;Body;Body;Body;1stExon;TSS1500	shore;shore;shelf;opensea;opensea;shore;shore	-0.427744	hypo	3	-0.420778
CACNB2	550.603	2.03184	0.532255	3.81742	0.000134856	0.00145165	7	cg03103919;cg05719612;cg07731871;cg15169374;cg19998294;cg22858500;cg25868936	Body;Body;Body;Body;Body;Body;Body	opensea;opensea;opensea;opensea;opensea;opensea;opensea	-0.508383	hypo	7	-0.508383
TMPRSS6	42.1571	1.00326	0.373233	2.68803	0.00718744	0.0337413	7	cg05754122;cg16971128;cg17745234;cg17956747;cg18617091;cg19979738;cg21188731	TSS200;TSS200;1stExon;Body;Body;Body;Body	opensea;opensea;opensea;shelf;shore;shelf;shelf	-0.525201	hypo	4	-0.531822
ARHGEF10L	601.345	3.52715	0.416927	8.45987	2.68e-17	7.55e-15	6	cg04788390;cg08947790;cg11742472;cg12623625;cg14780070;cg24394336	Body;5'UTR;Body;Body;Body;Body	opensea;opensea;opensea;shelf;shore;opensea	-0.434075	hypo	5	-0.439295
GPT2	4070.99	3.4516	0.411228	8.3934	4.72e-17	1.25e-14	6	cg00622166;cg02506360;cg03533472;cg05380921;cg07710971;cg23684449	Body;3'UTR;Body;Body;Body;Body	shore;opensea;shore;shelf;shore;shore	-0.465178	hypo	5	-0.487906
LAG3	564.503	7.29935	0.976457	7.47534	7.7e-14	1.09e-11	6	cg01820374;cg04153135;cg04671742;cg19421125;cg20652042;cg22777668	Body;TSS1500;1stExon;Body;Body;TSS1500	shore;shore;shore;island;shore;shore	-0.304192	hypo	3	-0.250659
SECTM1	308.196	5.22386	0.733507	7.12175	1.07e-12	1.23e-10	6	cg09043518;cg09237133;cg09340279;cg14728380;cg22156899;cg27666046	5'UTR;3'UTR;3'UTR;Body;Body;3'UTR	shore;island;island;shore;shelf;island	-0.407575	hypo	2	-0.487398
LAX1	2204.71	1.98137	0.285069	6.95047	3.64e-12	3.77e-10	6	cg00942920;cg06958535;cg12022621;cg17711527;cg23893629;cg25625457	Body;1stExon;1stExon;1stExon;TSS1500;TSS1500	opensea;opensea;opensea;opensea;opensea;opensea	-0.504087	hypo	1	-0.409395
SERINC5	852.335	2.83495	0.42075	6.73787	1.61e-11	1.44e-09	6	cg01267797;cg07172701;cg10531355;cg14711743;cg19683073;cg22422937	Body;Body;Body;Body;TSS1500;Body	opensea;opensea;opensea;opensea;shore;opensea	-0.423396	hypo	5	-0.455997
C6orf106	10136.8	1.38136	0.27345	5.05158	4.38e-07	1.17e-05	6	cg06810293;cg07236076;cg10163122;cg10519906;cg14725580;cg15653111	Body;Body;Body;Body;Body;Body	shelf;shore;opensea;opensea;shore;opensea	-0.502715	hypo	6	-0.502715
RPS18	52021.9	1.59296	0.329392	4.83607	1.32e-06	3.08e-05	6	cg08014182;cg09591519;cg12583553;cg15484808;cg25636481;cg27182159	Body;Body;Body;Body;Body;Body	shore;shore;shelf;shelf;shore;shore	-0.523754	hypo	6	-0.523754
ATP1A1	7423.41	1.02325	0.217492	4.70477	2.54e-06	5.33e-05	6	cg04403423;cg17107017;cg17469276;cg18026772;cg20309677;cg25346117	Body;TSS1500;TSS1500;Body;TSS1500;Body	shore;opensea;opensea;opensea;opensea;opensea	-0.544387	hypo	3	-0.419423
EZR	46888.5	1.59895	0.375898	4.25369	2.1e-05	0.00031117	6	cg13026729;cg13433729;cg15118447;cg15481472;cg16978168;cg23496730	TSS1500;Body;Body;Body;Body;Body	island;opensea;opensea;opensea;opensea;opensea	-0.515497	hypo	5	-0.549297
DLGAP4	4047.82	1.10621	0.289464	3.82159	0.000132595	0.00143328	6	cg00159764;cg01982835;cg12492027;cg15730121;cg17566560;cg24216770	5'UTR;TSS200;TSS1500;Body;Body;Body	shore;opensea;shore;shelf;opensea;shore	-0.488107	hypo	3	-0.588344
TMTC1	7.63349	3.8075	1.3472	2.82624	0.00470987	0.0245199	6	cg08729318;cg13318543;cg16833797;cg18074189;cg26479868;cg27205798	5'UTR;5'UTR;Body;Body;Body;Body	island;shelf;opensea;opensea;opensea;opensea	-0.288402	hypo	4	-0.374444
ABLIM3	20.1052	3.91506	1.51642	2.58178	0.00982925	0.0429099	6	cg02306139;cg06539116;cg10574431;cg12302647;cg23518039;cg27130993	3'UTR;Body;Body;Body;Body;Body	opensea;opensea;opensea;opensea;opensea;opensea	-0.318749	hypo	5	-0.331834
KSR2	1894.36	9.6469	0.843432	11.4377	2.71e-30	5.15e-27	5	cg06296759;cg06711448;cg10084383;cg21620979;cg24506782	Body;Body;Body;Body;Body	opensea;opensea;shore;opensea;shelf	-0.400627	hypo	5	-0.400627
RPL13AP5	320.077	3.59681	0.330999	10.8665	1.66e-27	2.15e-24	5	cg08570691;cg11252555;cg15531369;cg24082526;cg27321942	Body;Body;Body;Body;Body	shelf;shelf;shore;shore;shore	-0.371563	hypo	5	-0.371563
TGFBI	5077.42	6.89351	0.67714	10.1803	2.43e-24	2.38e-21	5	cg05838308;cg09096234;cg10648763;cg21550219;cg21583694	Body;Body;TSS200;Body;Body	shelf;shore;shore;opensea;shore	-0.357637	hypo	4	-0.36257
TLK1	8529.21	1.21747	0.143693	8.4727	2.4e-17	6.83e-15	5	cg01970904;cg05590818;cg08863939;cg10033675;cg24772525	Body;Body;5'UTR;Body;Body	shelf;opensea;opensea;shore;shore	-0.507081	hypo	4	-0.534402
RBM20	738.584	8.5475	1.21003	7.06388	1.62e-12	1.81e-10	5	cg04840051;cg10955669;cg15880704;cg16265932;cg22623319	Body;Body;Body;Body;Body	opensea;opensea;opensea;opensea;shelf	-0.459985	hypo	5	-0.459985
COL9A2	4117.02	2.17713	0.346303	6.28677	3.24e-10	2.11e-08	5	cg02961012;cg04100190;cg07063183;cg10512203;cg12733396	Body;TSS1500;Body;Body;TSS1500	shore;shore;shore;shore;shore	-0.384642	hypo	3	-0.356674
RASGRF1	2929.56	2.65764	0.439117	6.05224	1.43e-09	8.01e-08	5	cg02587988;cg06376992;cg21840434;cg22821300;cg24231513	Body;Body;1stExon;Body;TSS1500	opensea;opensea;opensea;opensea;opensea	-0.415451	hypo	3	-0.438611
WDFY1	5152.35	1.29678	0.238747	5.43161	5.58e-08	1.97e-06	5	cg02225786;cg02879423;cg15457217;cg17778556;cg23363263	Body;Body;Body;Body;Body	shore;shelf;opensea;opensea;opensea	-0.478481	hypo	5	-0.478481
FBXO21	2932.39	1.38787	0.264191	5.25329	1.49e-07	4.62e-06	5	cg01817067;cg04402948;cg14743206;cg18860868;cg26376280	Body;Body;Body;Body;Body	shore;opensea;shelf;opensea;shore	-0.268646	hypo	5	-0.268646
PTPRG	523.345	2.71059	0.583548	4.64502	3.4e-06	6.83e-05	5	cg03826247;cg06339171;cg07099186;cg11934688;cg16196857	Body;Body;Body;Body;Body	opensea;opensea;opensea;opensea;opensea	-0.346252	hypo	5	-0.346252
TXNDC11	2683.83	1.02165	0.259631	3.935	8.32e-05	0.000976827	5	cg00288844;cg04904276;cg05036502;cg06707356;cg06994787	Body;Body;Body;Body;Body	shore;shore;opensea;shelf;shore	-0.423658	hypo	5	-0.423658
C8orf46	95.1534	2.4139	0.673776	3.58264	0.00034014	0.00308031	5	cg06890415;cg09622557;cg10635330;cg15070801;cg15798873	TSS200;Body;TSS200;Body;Body	opensea;island;opensea;island;island	-0.524811	hypo	3	-0.667213
LILRA4	1427.44	2.70882	0.7967	3.40006	0.000673721	0.00534769	5	cg02434051;cg03575041;cg20542190;cg23899409;cg24755177	Body;TSS1500;TSS200;TSS200;TSS1500	opensea;opensea;opensea;opensea;opensea	-0.450387	hypo	1	-0.487669
RAB11FIP1	9564.06	1.24133	0.402085	3.08723	0.00202031	0.0127346	5	cg03318906;cg14089503;cg16840978;cg17218270;cg17339440	Body;Body;Body;Body;Body	shore;shore;shelf;opensea;opensea	-0.464141	hypo	5	-0.464141
SDK2	4105.93	1.69024	0.564631	2.99352	0.00275777	0.0161429	5	cg00290483;cg01691104;cg19787125;cg20614854;cg22895083	Body;Body;Body;3'UTR;Body	island;opensea;opensea;opensea;shore	-0.363759	hypo	4	-0.360348
BTBD19	122.236	1.50972	0.540033	2.79561	0.00518025	0.0264275	5	cg00043599;cg02923972;cg12275060;cg14565781;cg17093466	Body;Body;Body;1stExon;Body	shelf;shore;island;shelf;shelf	-0.496311	hypo	4	-0.49461
SMURF1	2118.61	1.11132	0.42333	2.62518	0.00866031	0.0389536	5	cg02531439;cg08486903;cg13152501;cg17146738;cg18887230	Body;Body;3'UTR;Body;Body	opensea;shore;opensea;shore;shore	-0.328067	hypo	4	-0.332971
EPS8L2	365.853	1.07329	0.42308	2.53685	0.0111856	0.0473472	5	cg01963374;cg13555772;cg17469934;cg18770763;cg23856257	TSS1500;TSS1500;Body;Body;Body	shore;shore;shore;shore;shore	-0.325486	hypo	3	-0.369886
ETV6	4708.13	1.57309	0.156502	10.0516	9.04e-24	8.3e-21	4	cg05161923;cg08064997;cg18763536;cg26373351	Body;Body;Body;Body	opensea;opensea;opensea;opensea	-0.431027	hypo	4	-0.431027
CDK14	9555.5	2.03998	0.227395	8.97106	2.94e-19	1.21e-16	4	cg03834767;cg09781028;cg15798153;cg21700774	3'UTR;Body;1stExon;Body	opensea;opensea;opensea;opensea	-0.591	hypo	2	-0.659933
PITPNM2	8970.18	2.45715	0.284696	8.63079	6.09e-18	1.89e-15	4	cg01973483;cg09931783;cg12812394;cg18637761	5'UTR;3'UTR;Body;3'UTR	opensea;shore;shelf;shore	-0.468385	hypo	1	-0.430629
BMF	11340.8	1.9556	0.2435	8.03122	9.65e-16	2.05e-13	4	cg07712904;cg07887985;cg18494902;cg26662201	Body;TSS200;TSS1500;TSS200	opensea;shelf;shelf;shelf	-0.446987	hypo	1	-0.307583
NOD2	1078.03	3.04917	0.426776	7.14466	9.02e-13	1.07e-10	4	cg04172533;cg08554257;cg16771652;cg26954174	Body;TSS1500;TSS1500;TSS1500	opensea;opensea;opensea;opensea	-0.389864	hypo	1	-0.291836
TGFBR3	1188.16	4.75309	0.720616	6.59587	4.23e-11	3.48e-09	4	cg00342358;cg01081930;cg01336162;cg15326069	5'UTR;Body;5'UTR;Body	shore;opensea;shore;opensea	-0.480764	hypo	2	-0.537962
FHDC1	531.408	3.75591	0.576058	6.52002	7.03e-11	5.41e-09	4	cg00170487;cg01674147;cg07097184;cg18902697	Body;Body;3'UTR;TSS1500	opensea;opensea;shelf;shelf	-0.37992	hypo	2	-0.446523
RXRA	2473.74	3.67269	0.580949	6.32188	2.58e-10	1.72e-08	4	cg00753924;cg13847322;cg13931640;cg14154547	Body;Body;Body;Body	shore;opensea;opensea;opensea	-0.318458	hypo	4	-0.318458
ABI1	7498.29	1.06731	0.168946	6.31746	2.66e-10	1.77e-08	4	cg03625292;cg17850367;cg18825419;cg26142490	Body;TSS1500;TSS1500;Body	shore;shore;shore;opensea	-0.490419	hypo	2	-0.582141
DCLK2	2015.21	3.40354	0.54026	6.29982	2.98e-10	1.96e-08	4	cg03779973;cg05561193;cg10190898;cg12115081	Body;TSS1500;Body;Body	shore;shore;opensea;opensea	-0.537018	hypo	3	-0.566434
APOBEC3H	94.7307	2.23905	0.357132	6.26952	3.62e-10	2.34e-08	4	cg06229674;cg17972162;cg18696237;cg24424889	TSS1500;Body;TSS1500;5'UTR	opensea;opensea;opensea;opensea	-0.505969	hypo	1	-0.482022
GAB1	4592.34	2.69549	0.436805	6.17092	6.79e-10	4.18e-08	4	cg06855485;cg12710519;cg14142817;cg25911551	Body;Body;Body;Body	opensea;opensea;opensea;opensea	-0.608834	hypo	4	-0.608834
INPP5F	10269	2.1867	0.36995	5.9108	3.4e-09	1.71e-07	4	cg07003611;cg10053779;cg20704028;cg25045785	Body;Body;Body;Body	shelf;opensea;opensea;shore	-0.592651	hypo	4	-0.592651
ZC3H7A	5509.65	1.16914	0.20743	5.63632	1.74e-08	7.26e-07	4	cg04010868;cg09095525;cg14959707;cg26521448	5'UTR;Body;5'UTR;TSS200	opensea;opensea;opensea;opensea	-0.522509	hypo	1	-0.439695
RPS12	41216.2	1.45665	0.268884	5.41737	6.05e-08	2.12e-06	4	cg04375784;cg13590475;cg15108334;cg27618792	Body;Body;Body;Body	shore;shore;shore;shelf	-0.369667	hypo	4	-0.369667
FLT3	702.114	4.05505	0.772285	5.25072	1.52e-07	4.68e-06	4	cg15126273;cg15613534;cg16639691;cg16936846	3'UTR;Body;Body;Body	opensea;opensea;opensea;opensea	-0.483405	hypo	3	-0.543334
PBX2	840.409	1.09109	0.209934	5.19728	2.02e-07	5.96e-06	4	cg03280235;cg04363228;cg16609995;cg20765522	TSS1500;Body;TSS1500;Body	opensea;opensea;opensea;opensea	-0.408424	hypo	2	-0.408757
APBB2	2528.27	2.95885	0.569924	5.19165	2.08e-07	6.11e-06	4	cg06970472;cg15989892;cg23884217;cg24644605	Body;5'UTR;5'UTR;Body	opensea;opensea;opensea;opensea	-0.291825	hypo	2	-0.248904
ZAP70	1690.09	2.90127	0.59531	4.87354	1.1e-06	2.62e-05	4	cg08859278;cg09006159;cg14537825;cg15933451	TSS1500;TSS1500;Body;TSS200	opensea;opensea;shelf;opensea	-0.300275	hypo	1	-0.217542
TOP1MT	2771.15	1.57135	0.328954	4.7768	1.78e-06	3.93e-05	4	cg08170427;cg08597832;cg14828673;cg17117981	Body;Body;Body;Body	opensea;shore;opensea;opensea	-0.389731	hypo	4	-0.389731
RPL3	93552.8	1.13037	0.258415	4.37424	1.22e-05	0.00019871	4	cg04982781;cg09282085;cg22416002;cg25386611	Body;Body;Body;Body	shore;shelf;shelf;shelf	-0.312611	hypo	4	-0.312611
ARL15	558.194	1.22031	0.281338	4.33752	1.44e-05	0.0002287	4	cg03978682;cg06461071;cg15931233;cg26814089	Body;Body;Body;Body	opensea;opensea;opensea;opensea	-0.389679	hypo	4	-0.389679
ZBTB32	2006.97	1.44697	0.353962	4.08792	4.35e-05	0.000574189	4	cg03068068;cg08539991;cg09231418;cg21062760	TSS1500;5'UTR;TSS1500;Body	shelf;shelf;opensea;shore	-0.475229	hypo	1	-0.52986
PLK3	1403.11	1.39926	0.343258	4.0764	4.57e-05	0.000597509	4	cg07368443;cg08259083;cg17233819;cg27583604	TSS1500;Body;Body;Body	shore;shelf;island;shore	-0.524021	hypo	3	-0.59603
ST6GALNAC4	2294.5	1.17788	0.290905	4.04903	5.14e-05	0.000657544	4	cg00677730;cg13687735;cg14081251;cg14518988	Body;5'UTR;5'UTR;Body	shore;shore;shore;shore	-0.43682	hypo	2	-0.420859
GRIK3	894.636	4.21753	1.09166	3.86339	0.000111823	0.0012474	4	cg08106961;cg13052954;cg17952046;cg23715749	Body;Body;Body;Body	opensea;opensea;opensea;opensea	-0.293118	hypo	4	-0.293118
GPD2	1910.02	1.09804	0.285545	3.84541	0.00012035	0.00132307	4	cg03230175;cg19062174;cg23077884;cg23836163	TSS1500;5'UTR;Body;Body	shore;opensea;opensea;opensea	-0.512604	hypo	2	-0.678153
PTPRJ	4521.95	1.12309	0.296306	3.79031	0.000150458	0.00158602	4	cg07401324;cg11468953;cg19268720;cg22976120	Body;Body;Body;Body	opensea;opensea;opensea;opensea	-0.485648	hypo	4	-0.485648
CD44	12915.6	1.08692	0.347814	3.125	0.00177804	0.0115344	4	cg02663352;cg06975166;cg14593191;cg25096745	Body;TSS1500;Body;Body	opensea;shore;opensea;opensea	-0.403444	hypo	3	-0.436937
FGR	10302	1.11194	0.378965	2.93416	0.00334447	0.0188189	4	cg00404394;cg03018771;cg09845000;cg16897005	5'UTR;Body;TSS1500;TSS1500	shore;shore;shore;shore	-0.38543	hypo	1	-0.385911
DNAJB13	767.209	1.07999	0.372185	2.90177	0.00371063	0.0204074	4	cg04044120;cg13953458;cg19692710;cg20071670	Body;3'UTR;1stExon;1stExon	opensea;opensea;opensea;opensea	-0.388584	hypo	1	-0.269954
DEGS2	153.55	1.44934	0.522493	2.7739	0.00553888	0.027848	4	cg01513978;cg01974091;cg04548002;cg14290450	Body;Body;Body;Body	shore;shore;shore;shore	-0.444049	hypo	4	-0.444049
RBM38	11292.2	1.00719	0.370188	2.72074	0.00651368	0.0313909	4	cg10336935;cg12255554;cg15636859;cg17799760	Body;3'UTR;Body;Body	shelf;island;island;shore	-0.420341	hypo	3	-0.468061
RGS10	1125.65	1.04103	0.386753	2.69171	0.00710876	0.0334879	4	cg00291478;cg05241536;cg15611912;cg17675386	Body;Body;Body;Body	shore;shelf;shore;opensea	-0.55857	hypo	4	-0.55857
GAS2L1	11.1083	2.65712	0.997826	2.66291	0.00774681	0.035702	4	cg01259126;cg02241145;cg08118034;cg24844449	Body;Body;Body;Body	shore;shore;island;island	-0.454719	hypo	4	-0.454719
THEMIS	22.9339	4.33146	1.63389	2.65101	0.00802522	0.0367709	4	cg11610626;cg21326251;cg25269388;cg27638432	5'UTR;5'UTR;Body;TSS1500	opensea;opensea;opensea;opensea	-0.290983	hypo	1	-0.338354
SDC3	230.723	2.2869	0.871774	2.62327	0.00870889	0.0391165	4	cg01566216;cg02303807;cg05374982;cg14836522	Body;Body;Body;Body	shore;opensea;opensea;opensea	-0.240324	hypo	4	-0.240324
TCF7	2982.64	1.49578	0.576472	2.59472	0.00946677	0.041679	4	cg08063911;cg15413523;cg18338046;cg25947408	5'UTR;5'UTR;Body;5'UTR	shore;shore;shore;shore	-0.329807	hypo	1	-0.318627
AKR1D1	1.68505	2.57911	1.01171	2.54927	0.0107948	0.0460655	4	cg05082563;cg15002691;cg17257469;cg25271841	Body;TSS200;Body;TSS1500	opensea;opensea;opensea;opensea	-0.36503	hypo	2	-0.285496
FRY	3530.99	3.5335	0.402321	8.78278	1.59e-18	5.47e-16	3	cg06871529;cg16995086;cg23705155	Body;Body;Body	opensea;opensea;opensea	-0.370187	hypo	3	-0.370187
CASS4	314.038	4.59897	0.526486	8.73522	2.43e-18	8.05e-16	3	cg00387658;cg24519157;cg26712809	TSS1500;Body;TSS1500	opensea;opensea;opensea	-0.466934	hypo	1	-0.581413
UBASH3B	4113.13	3.68629	0.462674	7.96736	1.62e-15	3.3e-13	3	cg20249071;cg25994988;cg26684673	3'UTR;Body;Body	opensea;opensea;opensea	-0.302039	hypo	2	-0.302471
SRGAP3	278.003	2.68537	0.379762	7.07119	1.54e-12	1.72e-10	3	cg13475822;cg26184741;cg26389316	Body;TSS1500;Body	opensea;opensea;opensea	-0.514792	hypo	2	-0.540313
IGFBP4	4327.72	4.10052	0.616421	6.65215	2.89e-11	2.48e-09	3	cg02627216;cg11961138;cg17980404	TSS1500;TSS1500;Body	shore;island;shore	-0.346626	hypo	1	-0.471453
UBE2G1	5157.16	1.26035	0.191211	6.5914	4.36e-11	3.56e-09	3	cg15251697;cg21500092;cg27019093	Body;Body;Body	shelf;opensea;opensea	-0.355017	hypo	3	-0.355017
IL10RA	19176	1.88931	0.287369	6.57449	4.88e-11	3.96e-09	3	cg05468843;cg07237926;cg26661481	Body;Body;TSS1500	shore;shore;shore	-0.4352	hypo	2	-0.4501
CSNK1E	5377.38	1.4267	0.223817	6.37441	1.84e-10	1.27e-08	3	cg01346718;cg03228516;cg22494725	5'UTR;5'UTR;Body	shore;shore;shelf	-0.275848	hypo	1	-0.255435
SP4	2655.74	1.30044	0.205668	6.32297	2.57e-10	1.72e-08	3	cg10365563;cg19644145;cg24101039	Body;Body;Body	shore;opensea;shelf	-0.562845	hypo	3	-0.562845
SIAH1	1232.24	1.87793	0.29742	6.31407	2.72e-10	1.8e-08	3	cg03524700;cg06183001;cg08088511	Body;5'UTR;5'UTR	shore;opensea;opensea	-0.324152	hypo	1	-0.272929
ABCG1	2112.07	1.84712	0.306497	6.02656	1.67e-09	9.17e-08	3	cg00177237;cg05046272;cg20214535	Body;TSS1500;TSS1500	shelf;opensea;opensea	-0.627887	hypo	1	-0.703499
YPEL2	4626.39	1.3633	0.257739	5.28945	1.23e-07	3.88e-06	3	cg01653532;cg10708739;cg13855435	Body;Body;Body	opensea;opensea;opensea	-0.629248	hypo	3	-0.629248
SH2D1B	38.6925	6.60305	1.30206	5.07124	3.95e-07	1.08e-05	3	cg01062020;cg15617640;cg26379475	TSS1500;Body;1stExon	opensea;opensea;opensea	-0.312237	hypo	1	-0.271596
DOCK7	1097.62	1.16059	0.229515	5.05671	4.27e-07	1.15e-05	3	cg01097102;cg10583485;cg16991569	Body;Body;Body	shore;shelf;opensea	-0.356299	hypo	3	-0.356299
B4GALT1	12575.2	1.18307	0.234683	5.04116	4.63e-07	1.23e-05	3	cg05779272;cg13858803;cg14080050	TSS1500;Body;Body	shore;opensea;opensea	-0.339393	hypo	2	-0.325204
TK2	255.135	1.346	0.267496	5.03185	4.86e-07	1.29e-05	3	cg00187129;cg07512993;cg09238666	Body;Body;TSS200	shelf;shore;shore	-0.654569	hypo	2	-0.658962
MAPKAPK2	8038.74	1.3566	0.270264	5.01954	5.18e-07	1.36e-05	3	cg08055786;cg24141516;cg25741609	TSS1500;Body;Body	shore;opensea;opensea	-0.492231	hypo	2	-0.459652
BEST4	68.8632	1.88856	0.38023	4.96688	6.8e-07	1.73e-05	3	cg00280609;cg02072975;cg15502465	Body;3'UTR;Body	shore;shore;shore	-0.423129	hypo	2	-0.388974
CAPN9	27.9704	5.37563	1.10028	4.88568	1.03e-06	2.48e-05	3	cg00563566;cg03704061;cg06585893	1stExon;1stExon;Body	opensea;opensea;opensea	-0.330591	hypo	1	-0.482573
OSBPL5	333.539	5.24125	1.10788	4.73089	2.24e-06	4.79e-05	3	cg01418188;cg06131936;cg20511548	Body;TSS1500;5'UTR	shelf;shore;shelf	-0.339393	hypo	1	-0.295095
PPTC7	7961.87	1.17101	0.250813	4.66886	3.03e-06	6.2e-05	3	cg05202616;cg08752433;cg15698107	Body;Body;Body	opensea;shelf;opensea	-0.569002	hypo	3	-0.569002
AGPAT5	4353.37	1.5061	0.325093	4.63284	3.61e-06	7.19e-05	3	cg10134963;cg25004868;cg26814335	Body;Body;Body	opensea;opensea;opensea	-0.405655	hypo	3	-0.405655
ST14	4242.3	1.48798	0.338725	4.39289	1.12e-05	0.000184329	3	cg04103418;cg09586924;cg16358741	Body;Body;Body	shelf;shelf;shore	-0.456097	hypo	3	-0.456097
ARHGAP25	12353.3	1.06247	0.244356	4.34804	1.37e-05	0.000219593	3	cg07914962;cg17754943;cg23817627	Body;Body;Body	opensea;opensea;opensea	-0.308192	hypo	3	-0.308192
CBX7	8344.12	1.14901	0.270556	4.24683	2.17e-05	0.000318912	3	cg12193277;cg18708252;cg23124451	Body;Body;Body	shore;shelf;island	-0.282869	hypo	3	-0.282869
ATP1B1	267.514	2.47807	0.621242	3.9889	6.64e-05	0.000811145	3	cg06176471;cg13104274;cg26009832	Body;Body;Body	opensea;shore;opensea	-0.417264	hypo	3	-0.417264
FRK	303.123	3.19848	0.811816	3.93991	8.15e-05	0.00095942	3	cg06127202;cg16176600;cg23628721	Body;1stExon;Body	opensea;opensea;opensea	-0.475933	hypo	2	-0.547237
YBX1	13577.9	1.04261	0.266696	3.90936	9.25e-05	0.00106847	3	cg07603685;cg15557459;cg26837708	Body;Body;Body	opensea;shelf;shore	-0.362703	hypo	3	-0.362703
STK32B	388.598	4.8607	1.25326	3.87846	0.000105122	0.00118724	3	cg12044923;cg14582191;cg21186966	Body;Body;Body	opensea;opensea;opensea	-0.461162	hypo	3	-0.461162
PDE4B	11467.9	1.21849	0.322225	3.78149	0.000155896	0.00163607	3	cg08462879;cg20169766;cg27631199	Body;Body;5'UTR	opensea;opensea;opensea	-0.316846	hypo	2	-0.323076
IMMP2L	465.653	1.07391	0.290305	3.69924	0.000216245	0.00213708	3	cg02787120;cg07373723;cg19798735	5'UTR;Body;Body	shore;opensea;opensea	-0.478344	hypo	2	-0.377072
CKLF	157.517	1.02047	0.284272	3.58978	0.000330961	0.00301251	3	cg02295216;cg04701716;cg09728392	TSS1500;Body;TSS1500	shore;shelf;shore	-0.285432	hypo	1	-0.342462
MYO1G	4251.31	-1.01889	0.292378	-3.48483	0.000492442	0.00414571	3	cg04180046;cg07826859;cg09948419	Body;TSS1500;TSS1500	island;opensea;opensea	-0.214824	hyper	1	0.225387
TBC1D1	9531.78	1.10204	0.322931	3.41262	0.000643414	0.00516036	3	cg04710179;cg05196835;cg08266311	TSS1500;Body;Body	shore;opensea;opensea	-0.345963	hypo	2	-0.368989
SPARC	186.774	3.89821	1.1594	3.36226	0.000773077	0.00598289	3	cg07539983;cg13319042;cg23174201	TSS1500;TSS1500;Body	opensea;opensea;opensea	-0.303484	hypo	1	-0.2156
ELK3	643.776	-1.3634	0.427092	-3.1923	0.00141146	0.00962337	3	cg11265839;cg21173239;cg22876356	Body;TSS1500;5'UTR	shelf;shore;shelf	-0.15584	hyper	1	0.317297
MBNL2	1853.06	1.05663	0.345961	3.0542	0.00225665	0.0138472	3	cg02838877;cg06340704;cg24714606	TSS1500;5'UTR;Body	opensea;opensea;opensea	-0.328526	hypo	1	-0.367795
MMP14	358.562	1.15024	0.377138	3.04991	0.00228906	0.0139715	3	cg10418289;cg13094752;cg27020028	Body;TSS1500;TSS1500	shore;shore;shore	-0.283361	hypo	1	-0.353291
LCP2	1131.82	1.31682	0.432957	3.04145	0.00235438	0.0142625	3	cg02676052;cg05265596;cg08748308	TSS1500;Body;Body	opensea;opensea;opensea	-0.370491	hypo	2	-0.417329
PLEKHG3	42.3871	3.15416	1.05218	2.99774	0.00271988	0.0159605	3	cg12063688;cg22909759;cg24671666	5'UTR;5'UTR;Body	shore;opensea;shelf	-0.232693	hypo	1	-0.211373
NTN4	10.8778	3.83176	1.29767	2.95279	0.00314915	0.0179433	3	cg08535361;cg14280382;cg16318311	Body;Body;Body	opensea;opensea;opensea	-0.378727	hypo	3	-0.378727
HCN2	58.859	1.76273	0.598953	2.94301	0.00325036	0.0184058	3	cg06509837;cg19865472;cg26580869	Body;3'UTR;Body	shore;island;island	-0.309378	hypo	2	-0.298198
IL6R	772.156	1.50513	0.518948	2.90034	0.00372759	0.020473	3	cg00791854;cg17427986;cg20688791	Body;Body;Body	opensea;opensea;opensea	-0.389019	hypo	3	-0.389019
PLXDC2	41.4297	2.59324	0.925231	2.8028	0.00506611	0.0259522	3	cg03631457;cg14049470;cg24164296	Body;1stExon;Body	opensea;island;opensea	-0.208325	hypo	2	-0.413994
DPP4	112.551	2.59669	0.930575	2.79041	0.00526413	0.0267071	3	cg12649175;cg15353603;cg16172329	Body;Body;Body	shelf;opensea;opensea	-0.306649	hypo	3	-0.306649
ITGA5	394.096	1.6223	0.604103	2.68547	0.00724286	0.0339231	3	cg01213231;cg09583374;cg20909017	Body;Body;Body	opensea;shelf;opensea	-0.433213	hypo	3	-0.433213
PDE7B	323.791	1.2674	0.492059	2.57571	0.0100035	0.0434905	3	cg06135425;cg24777101;cg26188226	Body;Body;Body	opensea;opensea;opensea	-0.340015	hypo	3	-0.340015
MORF4L1	8567.7	2.12314	0.174551	12.1634	4.87e-34	1.73e-30	2	cg04661436;cg12394014	Body;Body	shelf;opensea	-0.396919	hypo	2	-0.396919
CTLA4	4506.14	8.30965	0.746503	11.1314	8.82e-29	1.32e-25	2	cg05074138;cg26091609	1stExon;Body	opensea;opensea	-0.660621	hypo	1	-0.695491
MEX3C	8052.54	1.76117	0.204613	8.60734	7.48e-18	2.24e-15	2	cg02895724;cg27511678	Body;Body	shelf;shore	-0.404237	hypo	2	-0.404237
PLXND1	2014.86	3.95825	0.49446	8.0052	1.19e-15	2.46e-13	2	cg02544002;cg04506190	Body;Body	shore;island	-0.311248	hypo	2	-0.311248
CELSR1	8480.96	1.77423	0.225083	7.88256	3.21e-15	5.97e-13	2	cg00253398;cg09461388	Body;Body	shore;shore	-0.405725	hypo	2	-0.405725
CD5	3707.01	3.74433	0.487731	7.67704	1.63e-14	2.74e-12	2	cg22202088;cg27301655	Body;TSS1500	opensea;opensea	-0.351412	hypo	1	-0.34012
ARHGAP24	6813.49	1.74034	0.257182	6.76695	1.32e-11	1.21e-09	2	cg17425014;cg25310097	Body;Body	opensea;opensea	-0.400931	hypo	2	-0.400931
ATP2B4	5304.11	2.43246	0.360478	6.74787	1.5e-11	1.37e-09	2	cg01948978;cg13115222	3'UTR;Body	opensea;opensea	-0.252617	hypo	1	-0.215709
WNT9A	244.871	7.03464	1.08278	6.49683	8.2e-11	6.18e-09	2	cg24312489;cg27570354	3'UTR;Body	shelf;shelf	-0.312755	hypo	1	-0.242053
COL9A3	1651.33	2.69846	0.419899	6.42645	1.31e-10	9.39e-09	2	cg08021508;cg13952002	Body;Body	island;shelf	-0.272901	hypo	2	-0.272901
GCLC	2858.4	1.83778	0.286629	6.4117	1.44e-10	1.02e-08	2	cg02731193;cg08349400	Body;Body	shore;opensea	-0.320094	hypo	2	-0.320094
FAM3C	3694.17	1.82249	0.306388	5.94831	2.71e-09	1.41e-07	2	cg03485909;cg04873577	5'UTR;Body	shore;opensea	-0.340075	hypo	1	-0.378795
HIVEP1	6065.57	1.45554	0.245634	5.92564	3.11e-09	1.58e-07	2	cg19268652;cg20583432	Body;Body	opensea;opensea	-0.419521	hypo	2	-0.419521
NOSIP	4797.14	2.30952	0.392068	5.89061	3.85e-09	1.9e-07	2	cg08097359;cg18734095	5'UTR;Body	shelf;shore	-0.431869	hypo	1	-0.402606
STARD7	9831.95	1.12377	0.197998	5.67569	1.38e-08	5.92e-07	2	cg15136410;cg17526890	Body;Body	shore;opensea	-0.581281	hypo	2	-0.581281
PRF1	263.143	5.38748	0.953856	5.6481	1.62e-08	6.82e-07	2	cg02937751;cg09914304	Body;5'UTR	shore;shore	-0.261602	hypo	1	-0.289853
PHTF1	1926.78	1.51635	0.277386	5.46659	4.59e-08	1.66e-06	2	cg12587818;cg22495801	Body;Body	shore;shelf	-0.759234	hypo	2	-0.759234
UGCG	7331.46	1.21733	0.223087	5.45674	4.85e-08	1.75e-06	2	cg01472113;cg14278148	TSS1500;Body	shore;shelf	-0.631584	hypo	1	-0.61367
PHF1	2779.2	1.42018	0.263598	5.38768	7.14e-08	2.44e-06	2	cg02305757;cg08462194	Body;Body	shelf;shore	-0.450838	hypo	2	-0.450838
TESC	1100.07	2.56714	0.486528	5.27644	1.32e-07	4.13e-06	2	cg10856812;cg22517925	Body;Body	opensea;shore	-0.306537	hypo	2	-0.306537
DERL1	3940.81	1.09555	0.210481	5.205	1.94e-07	5.78e-06	2	cg14743346;cg21139496	Body;TSS1500	shelf;shore	-0.386352	hypo	1	-0.380318
PLCL2	6493.27	1.12703	0.217218	5.1885	2.12e-07	6.2e-06	2	cg02356435;cg15605530	TSS1500;Body	island;opensea	-0.376686	hypo	1	-0.484279
CPEB1	57.196	3.37713	0.659729	5.11896	3.07e-07	8.63e-06	2	cg00937012;cg11022060	TSS1500;Body	opensea;opensea	-0.302327	hypo	1	-0.231765
PXN	845.579	2.11973	0.415205	5.10526	3.3e-07	9.22e-06	2	cg04256697;cg27156259	Body;Body	opensea;opensea	-0.43069	hypo	2	-0.43069
PRKCE	4884.49	1.17287	0.236194	4.96572	6.84e-07	1.74e-05	2	cg08203192;cg24788291	Body;Body	shore;opensea	-0.517979	hypo	2	-0.517979
CCDC88A	18518.7	2.0721	0.428341	4.83749	1.31e-06	3.06e-05	2	cg01953317;cg13359689	Body;Body	shelf;opensea	-0.62728	hypo	2	-0.62728
FCER1G	99.1285	3.59683	0.749345	4.79996	1.59e-06	3.59e-05	2	cg20609803;cg20806175	TSS1500;Body	opensea;opensea	-0.632593	hypo	1	-0.520805
RIT1	1780.4	1.23684	0.263456	4.69468	2.67e-06	5.59e-05	2	cg08256691;cg13795986	TSS1500;Body	opensea;opensea	-0.375548	hypo	1	-0.225786
AP1S3	1369.96	1.34079	0.286791	4.67516	2.94e-06	6.03e-05	2	cg06751322;cg07813214	Body;TSS1500	opensea;shore	-0.470883	hypo	1	-0.548591
GNAO1	1624.56	4.38057	0.995085	4.4022	1.07e-05	0.000178518	2	cg03896542;cg26912314	Body;Body	opensea;opensea	-0.273346	hypo	2	-0.273346
FAM69A	1338.28	1.17697	0.269302	4.37045	1.24e-05	0.000201502	2	cg05036103;cg22128645	Body;Body	opensea;shore	-0.514041	hypo	2	-0.514041
PLCG1	4907.58	1.08852	0.249406	4.36445	1.27e-05	0.000205936	2	cg07893801;cg24961795	Body;Body	shore;shelf	-0.676823	hypo	2	-0.676823
TLE4	4271.99	1.11242	0.25962	4.28479	1.83e-05	0.000277451	2	cg13598109;cg14048465	Body;Body	opensea;opensea	-0.416749	hypo	2	-0.416749
YWHAQ	5922.63	1.0329	0.247658	4.17066	3.04e-05	0.000423282	2	cg13724182;cg14930864	Body;Body	opensea;opensea	-0.365742	hypo	2	-0.365742
FRMD4B	109.656	4.82771	1.16742	4.13537	3.54e-05	0.00048048	2	cg03882698;cg27423627	Body;Body	opensea;opensea	-0.315733	hypo	2	-0.315733
HMOX1	926.087	1.98589	0.488299	4.06696	4.76e-05	0.000617265	2	cg05718255;cg12151446	3'UTR;Body	opensea;shelf	-0.338978	hypo	1	-0.201681
RNF130	1730.48	1.49375	0.37162	4.01957	5.83e-05	0.000730646	2	cg04265672;cg26816636	Body;Body	opensea;shelf	-0.464788	hypo	2	-0.464788
NUDT4	1403.44	1.04127	0.259853	4.00716	6.15e-05	0.000760761	2	cg04677942;cg19554457	3'UTR;Body	opensea;shelf	-0.327882	hypo	1	-0.369125
CHDH	1149.73	2.55489	0.639124	3.99749	6.4e-05	0.000787449	2	cg04071104;cg17184165	5'UTR;Body	shore;shore	-0.57923	hypo	1	-0.530304
GLDN	56.3491	4.73664	1.20332	3.93631	8.27e-05	0.000972921	2	cg05303280;cg05404865	TSS1500;Body	shore;opensea	-0.406968	hypo	1	-0.294824
TADA2B	3013.13	1.04697	0.267159	3.91889	8.9e-05	0.00103352	2	cg02726278;cg24709285	Body;Body	shore;shore	-0.392246	hypo	2	-0.392246
CABLES1	746.143	2.78265	0.711463	3.91116	9.19e-05	0.00106195	2	cg22158648;cg26052586	TSS1500;Body	shore;shore	-0.447668	hypo	1	-0.41121
GZMB	77.4233	3.94213	1.03378	3.81332	0.00013711	0.0014698	2	cg03875678;cg18118198	TSS200;Body	opensea;opensea	-0.314084	hypo	1	-0.242861
RRBP1	4161.96	1.51467	0.402421	3.7639	0.000167282	0.00173764	2	cg00417151;cg05955436	Body;5'UTR	shelf;shore	-0.365951	hypo	1	-0.320141
CHD2	27193.7	1.11884	0.304875	3.66983	0.000242707	0.00235367	2	cg08899105;cg26694290	Body;Body	shelf;opensea	-0.379483	hypo	2	-0.379483
MEG3	17.963	4.81692	1.31631	3.6594	0.000252811	0.00243341	2	cg09285543;cg24757755	Body;Body	shore;opensea	-0.322724	hypo	2	-0.322724
PHF13	818.697	1.11561	0.305728	3.64902	0.000263245	0.00251093	2	cg06778853;cg12907598	TSS1500;Body	shore;shore	-0.51102	hypo	1	-0.605892
ABCC3	43.9403	3.82098	1.05322	3.62791	0.00028572	0.00268394	2	cg14592673;cg18312989	3'UTR;Body	opensea;opensea	-0.361839	hypo	1	-0.266042
NUAK1	9.74566	2.88788	0.825623	3.49782	0.000469083	0.00398278	2	cg02926307;cg19061112	Body;Body	opensea;opensea	-0.361494	hypo	2	-0.361494
CD63	1811.49	1.07651	0.319688	3.36736	0.000758908	0.00589085	2	cg11848173;cg21008399	Body;Body	shore;shore	-0.564592	hypo	2	-0.564592
CLU	148.538	3.86012	1.15751	3.33484	0.000853472	0.00648001	2	cg02393097;cg13620439	TSS1500;Body	shore;opensea	-0.396275	hypo	1	-0.391452
SNX9	4697.37	1.57883	0.474666	3.32619	0.000880405	0.00664024	2	cg04064963;cg15264757	TSS1500;Body	shore;opensea	-0.344671	hypo	1	-0.246796
POU5F1	14.3539	2.17566	0.66336	3.27976	0.00103896	0.00758296	2	cg07764829;cg15316118	1stExon;Body	opensea;opensea	-0.669879	hypo	1	-0.606079
INPP4B	47.8184	3.42939	1.0616	3.2304	0.00123618	0.00867766	2	cg19577080;cg24759237	5'UTR;Body	opensea;opensea	-0.375776	hypo	1	-0.26804
TBX21	557.583	1.20261	0.372465	3.22877	0.00124323	0.00871211	2	cg08670136;cg16928046	TSS1500;Body	shore;shore	-0.50015	hypo	1	-0.64807
LMO7	1659.62	1.21359	0.376733	3.22134	0.00127592	0.00888652	2	cg00902815;cg18027592	Body;Body	opensea;opensea	-0.352669	hypo	2	-0.352669
AGAP3	720.571	1.04023	0.326379	3.18719	0.00143662	0.00976915	2	cg08708553;cg12599641	Body;Body	shore;opensea	-0.253702	hypo	2	-0.253702
LTK	870.266	1.75027	0.573202	3.05349	0.00226193	0.0138677	2	cg03321553;cg18168740	TSS200;Body	shore;shelf	-0.28216	hypo	1	-0.218255
CRY2	2489.07	1.09307	0.369785	2.95596	0.00311699	0.0178243	2	cg15675740;cg24305156	Body;Body	opensea;shelf	-0.398949	hypo	2	-0.398949
SCNN1A	5.50878	2.63478	0.932471	2.82559	0.00471935	0.0245558	2	cg22245858;cg26244013	TSS200;Body	opensea;shelf	-0.403544	hypo	1	-0.55496
CAND2	148.468	1.11404	0.398941	2.79251	0.00523014	0.0265915	2	cg00351152;cg11200930	TSS1500;Body	shore;shore	-0.378551	hypo	1	-0.448994
C17orf97	8.63821	-2.48177	0.894345	-2.77495	0.00552098	0.0277825	2	cg00842595;cg25045219	Body;Body	island;island	0.355969	hyper	2	0.355969
RAB43	132.013	1.52255	0.549543	2.77057	0.00559589	0.0280702	2	cg01313358;cg05859076	TSS1500;Body	shore;shore	-0.361696	hypo	1	-0.369835
ZBTB10	4744.65	1.0682	0.39058	2.7349	0.00623988	0.0304633	2	cg07703530;cg20176142	Body;Body	opensea;opensea	-0.36065	hypo	2	-0.36065
MBOAT1	1056.83	1.5015	0.563235	2.66585	0.00767934	0.0354255	2	cg07057444;cg11639708	Body;Body	opensea;shelf	-0.616521	hypo	2	-0.616521
AKAP6	702.664	1.76062	0.690119	2.55118	0.010736	0.045911	2	cg07185587;cg20448706	Body;Body	opensea;opensea	-0.399253	hypo	2	-0.399253
GAB2	7978.72	3.2311	0.273681	11.8061	3.63e-32	1.03e-28	1	cg05100279	Body	opensea	-0.203126	hypo	1	-0.203126
CKAP4	4469.28	3.44643	0.335115	10.2843	8.29e-25	8.43e-22	1	cg13249833	Body	shore	-0.448823	hypo	1	-0.448823
LEF1	5426.31	5.29109	0.532785	9.931	3.05e-23	2.41e-20	1	cg19296305	Body	opensea	-0.57391	hypo	1	-0.57391
BMPR2	6279.11	2.46352	0.264302	9.32087	1.15e-20	5.97e-18	1	cg14787880	Body	shore	-0.670959	hypo	1	-0.670959
ZNF101	4007.06	1.90341	0.205345	9.26932	1.87e-20	9.36e-18	1	cg17692971	Body	shore	-0.590983	hypo	1	-0.590983
SEPT7	12354.8	1.28888	0.143808	8.96251	3.17e-19	1.27e-16	1	cg17168428	Body	shelf	-0.53034	hypo	1	-0.53034
PPP1R2	5891.14	1.60109	0.180592	8.86576	7.6e-19	2.74e-16	1	cg00494544	Body	shore	-0.50245	hypo	1	-0.50245
RAPGEF3	4339.04	3.92094	0.450057	8.71208	2.98e-18	9.54e-16	1	cg13353550	Body	shelf	-0.618436	hypo	1	-0.618436
C11orf58	6500.12	1.26488	0.164449	7.69161	1.45e-14	2.46e-12	1	cg06617449	Body	shelf	-0.725163	hypo	1	-0.725163
HNRNPA1	38388.4	1.28534	0.16891	7.60961	2.75e-14	4.37e-12	1	cg02583484	Body	shelf	-0.348147	hypo	1	-0.348147
DTL	60.3517	-3.50143	0.462238	-7.57495	3.59e-14	5.59e-12	1	cg00863309	Body	opensea	0.235258	hyper	1	0.235258
STAM	2610.46	2.20233	0.296948	7.41654	1.2e-13	1.67e-11	1	cg09452147	Body	opensea	-0.200883	hypo	1	-0.200883
SGPP1	5946.69	1.71308	0.239988	7.13818	9.46e-13	1.11e-10	1	cg26013396	Body	shelf	-0.619475	hypo	1	-0.619475
GABRB2	850.971	6.19929	0.888065	6.98068	2.94e-12	3.09e-10	1	cg18794976	Body	opensea	-0.371006	hypo	1	-0.371006
GNPTAB	6875.56	1.75969	0.254785	6.90659	4.96e-12	5.01e-10	1	cg03756485	Body	opensea	-0.474618	hypo	1	-0.474618
SLC22A15	989.181	1.76261	0.259137	6.80186	1.03e-11	9.87e-10	1	cg22353097	Body	shelf	-0.453434	hypo	1	-0.453434
WDR82	8127.02	1.22562	0.18152	6.75198	1.46e-11	1.34e-09	1	cg03435448	Body	shore	-0.374709	hypo	1	-0.374709
MXI1	2392.91	1.72638	0.259835	6.64413	3.05e-11	2.6e-09	1	cg06071730	Body	opensea	-0.424764	hypo	1	-0.424764
VSIG10	565.531	3.54777	0.54795	6.47462	9.51e-11	7.04e-09	1	cg04041679	Body	shelf	-0.523016	hypo	1	-0.523016
ENPP2	827.029	4.19307	0.664884	6.30646	2.85e-10	1.89e-08	1	cg09444531	Body	opensea	-0.713149	hypo	1	-0.713149
TEAD2	1891.37	2.00401	0.337308	5.94117	2.83e-09	1.46e-07	1	cg13487726	Body	shelf	-0.515562	hypo	1	-0.515562
ZBTB24	3397.58	1.01036	0.17201	5.87388	4.26e-09	2.07e-07	1	cg02803604	Body	shore	-0.298299	hypo	1	-0.298299
MAP3K5	3128.81	1.16355	0.198208	5.87037	4.35e-09	2.1e-07	1	cg27501748	Body	opensea	-0.313434	hypo	1	-0.313434
RPL5	43839.9	1.26917	0.216223	5.86973	4.37e-09	2.11e-07	1	cg08661164	Body	shelf	-0.608101	hypo	1	-0.608101
DEPDC1B	11.9161	-3.69815	0.649002	-5.69821	1.21e-08	5.25e-07	1	cg03605542	Body	opensea	0.206558	hyper	1	0.206558
ZSWIM5	340.864	2.61684	0.475085	5.50814	3.63e-08	1.36e-06	1	cg04380118	Body	shore	-0.247685	hypo	1	-0.247685
SERHL	59.3542	1.91335	0.349069	5.4813	4.22e-08	1.55e-06	1	cg02431732	Body	shelf	-0.354322	hypo	1	-0.354322
ELF2	3151.98	1.25869	0.229997	5.47266	4.43e-08	1.61e-06	1	cg07002832	Body	shore	-0.488507	hypo	1	-0.488507
EEF1B2	21410.6	1.69587	0.310362	5.46415	4.65e-08	1.68e-06	1	cg27248887	Body	shore	-0.407777	hypo	1	-0.407777
ABCB10	2120.87	1.37129	0.251731	5.44746	5.11e-08	1.83e-06	1	cg00355656	Body	shore	-0.565959	hypo	1	-0.565959
TOMM20	4760.67	1.07562	0.199473	5.3923	6.96e-08	2.39e-06	1	cg19746343	Body	shore	-0.39886	hypo	1	-0.39886
RPS15A	7218.66	1.12037	0.208927	5.3625	8.21e-08	2.76e-06	1	cg00530414	Body	shore	-0.332418	hypo	1	-0.332418
BCL2	15558.6	1.66711	0.312083	5.3419	9.2e-08	3.04e-06	1	cg25373630	Body	shore	-0.483484	hypo	1	-0.483484
CYBRD1	339.762	3.42466	0.654978	5.22866	1.71e-07	5.19e-06	1	cg15691325	Body	opensea	-0.247747	hypo	1	-0.247747
VDAC2	1381.19	1.14245	0.218848	5.2203	1.79e-07	5.4e-06	1	cg15075988	Body	shelf	-0.409483	hypo	1	-0.409483
FEM1B	3530.11	1.12795	0.216896	5.20041	1.99e-07	5.89e-06	1	cg18571094	Body	shelf	-0.366163	hypo	1	-0.366163
GDF7	1521.93	2.03425	0.396124	5.13539	2.82e-07	7.95e-06	1	cg07789367	Body	shore	-0.244893	hypo	1	-0.244893
CGRRF1	729.199	1.34941	0.266273	5.06779	4.02e-07	1.1e-05	1	cg23020857	Body	shelf	-0.611321	hypo	1	-0.611321
TOP1	4199.18	1.30058	0.258419	5.03284	4.83e-07	1.28e-05	1	cg17156534	Body	shore	-0.266883	hypo	1	-0.266883
HLA-B	28952.1	1.52659	0.307843	4.95901	7.09e-07	1.79e-05	1	cg23923934	Body	shore	-0.481878	hypo	1	-0.481878
RNF138	2645.33	1.46612	0.300513	4.87872	1.07e-06	2.56e-05	1	cg20338754	Body	shelf	-0.525011	hypo	1	-0.525011
KPNA4	3924.64	1.07004	0.22151	4.83065	1.36e-06	3.15e-05	1	cg20378687	Body	shore	-0.462541	hypo	1	-0.462541
ABCD2	409.844	2.15391	0.448171	4.80601	1.54e-06	3.5e-05	1	cg13406085	Body	opensea	-0.316511	hypo	1	-0.316511
IDUA	341.58	-1.2638	0.264533	-4.77747	1.78e-06	3.92e-05	1	cg08332990	Body	island	0.204405	hyper	1	0.204405
MAP2K6	845.759	2.30764	0.483351	4.77426	1.8e-06	3.97e-05	1	cg12323063	Body	opensea	-0.69301	hypo	1	-0.69301
VASH1	2035.13	3.83527	0.812255	4.72176	2.34e-06	4.98e-05	1	cg21074797	Body	shore	-0.226099	hypo	1	-0.226099
ST3GAL5	3248.96	1.11448	0.237592	4.69074	2.72e-06	5.65e-05	1	cg06909254	Body	opensea	-0.582245	hypo	1	-0.582245
TCFL5	780.52	1.5034	0.321172	4.68098	2.86e-06	5.9e-05	1	cg01412764	Body	shore	-0.249424	hypo	1	-0.249424
SGSM1	1026.2	3.46033	0.739977	4.67626	2.92e-06	6.01e-05	1	cg03942471	Body	shelf	-0.237785	hypo	1	-0.237785
ABCC8	42.7266	3.13032	0.669471	4.67581	2.93e-06	6.02e-05	1	cg13295314	Body	opensea	-0.248033	hypo	1	-0.248033
ITGB5	200.567	4.3372	0.932683	4.65024	3.32e-06	6.68e-05	1	cg00171092	Body	opensea	-0.395583	hypo	1	-0.395583
MGAT4B	2908.13	1.01599	0.22103	4.5966	4.29e-06	8.3e-05	1	cg23011886	Body	shore	-0.720211	hypo	1	-0.720211
LPL	579.972	5.38703	1.18762	4.53599	5.73e-06	0.000105701	1	cg04649769	Body	shore	-0.241174	hypo	1	-0.241174
JMY	3558.86	1.81232	0.400502	4.52511	6.04e-06	0.000110174	1	cg24856658	Body	shore	-0.464911	hypo	1	-0.464911
COPS2	2709.65	1.17206	0.260554	4.49834	6.85e-06	0.000122408	1	cg19405329	Body	opensea	-0.36686	hypo	1	-0.36686
KLF11	2927.7	1.51901	0.338877	4.4825	7.38e-06	0.00013014	1	cg18825594	Body	island	-0.520981	hypo	1	-0.520981
MERTK	80.901	3.78719	0.84621	4.47548	7.62e-06	0.000133913	1	cg07748767	Body	shelf	-0.519506	hypo	1	-0.519506
MIER1	3963.87	1.08491	0.248758	4.36131	1.29e-05	0.000208676	1	cg15930380	Body	shelf	-0.239752	hypo	1	-0.239752
RPA1	4782.42	1.2689	0.297628	4.26337	2.01e-05	0.000300494	1	cg09021817	Body	island	-0.350205	hypo	1	-0.350205
RPS8	60484.7	1.11413	0.265957	4.18912	2.8e-05	0.000396199	1	cg03043406	Body	shore	-0.504199	hypo	1	-0.504199
CFL2	726.979	1.19748	0.287716	4.162	3.15e-05	0.00043603	1	cg25027125	Body	shore	-0.320046	hypo	1	-0.320046
ZBTB34	2112.78	1.17335	0.283003	4.14608	3.38e-05	0.000461485	1	cg14360444	Body	opensea	-0.372068	hypo	1	-0.372068
AP3B2	40.6919	2.40784	0.58112	4.14345	3.42e-05	0.000465837	1	cg19175742	Body	opensea	-0.300934	hypo	1	-0.300934
KRAS	4786.39	1.56788	0.380642	4.11904	3.8e-05	0.000511204	1	cg21247666	Body	opensea	-0.28085	hypo	1	-0.28085
WDR91	3916.67	1.07363	0.263171	4.07961	4.51e-05	0.000590273	1	cg23081855	Body	opensea	-0.254681	hypo	1	-0.254681
MAN1A1	3927.59	1.69261	0.415266	4.07595	4.58e-05	0.000597966	1	cg03051880	Body	opensea	-0.34646	hypo	1	-0.34646
RILPL1	57.5093	1.42112	0.354518	4.00859	6.11e-05	0.000757127	1	cg23825057	Body	shelf	-0.288935	hypo	1	-0.288935
RASSF4	167.949	2.24646	0.562125	3.99638	6.43e-05	0.000789695	1	cg11753018	Body	shore	-0.430481	hypo	1	-0.430481
TCTE1	56.828	1.97858	0.506736	3.90455	9.44e-05	0.00108595	1	cg04579415	Body	shore	-0.25147	hypo	1	-0.25147
PIWIL4	86.1309	1.42451	0.370525	3.84457	0.000120763	0.00132704	1	cg16436762	Body	opensea	-0.212727	hypo	1	-0.212727
RHBDD2	1588.67	1.19308	0.311095	3.8351	0.000125513	0.00137183	1	cg17325771	Body	shore	-0.232434	hypo	1	-0.232434
SLC9A3	28.0201	-1.519	0.397934	-3.81722	0.000134966	0.00145229	1	cg22572362	Body	island	0.269126	hyper	1	0.269126
AFF4	12582.3	1.1176	0.293361	3.80963	0.000139175	0.00148634	1	cg22212250	Body	opensea	-0.460062	hypo	1	-0.460062
BCL3	1693.98	1.22398	0.321624	3.80563	0.000141444	0.00150493	1	cg26470501	Body	shore	-0.407792	hypo	1	-0.407792
GTF2B	1473.21	1.36863	0.360259	3.79901	0.000145275	0.00153879	1	cg13109106	Body	opensea	-0.527608	hypo	1	-0.527608
DNAJC3	1692.75	1.01076	0.268884	3.7591	0.000170529	0.00176428	1	cg15959270	Body	shelf	-0.202786	hypo	1	-0.202786
SEPT10	495.187	5.11332	1.39713	3.65987	0.000252345	0.00243139	1	cg23688350	Body	opensea	-0.426325	hypo	1	-0.426325
MYO5C	274.278	1.54546	0.424043	3.64459	0.000267822	0.0025469	1	cg15605746	Body	shelf	-0.651728	hypo	1	-0.651728
BAIAP2L1	50.7566	-1.99923	0.550525	-3.63151	0.000281772	0.00265662	1	cg23598068	Body	opensea	0.257034	hyper	1	0.257034
BNC2	9.37682	5.0162	1.40333	3.57451	0.000350884	0.00315253	1	cg14157107	Body	opensea	-0.355481	hypo	1	-0.355481
YTHDC1	2074.41	1.16587	0.328842	3.54539	0.000392034	0.00344081	1	cg18440774	Body	shelf	-0.631091	hypo	1	-0.631091
SMCHD1	30443.8	1.03339	0.293697	3.51857	0.000433873	0.00373905	1	cg14945086	Body	shore	-0.576482	hypo	1	-0.576482
PHACTR2	679.287	1.04265	0.306001	3.40733	0.000656015	0.00523928	1	cg22660196	Body	opensea	-0.339275	hypo	1	-0.339275
CLEC4M	29.8442	2.49643	0.733663	3.40269	0.000667268	0.00530239	1	cg18515510	Body	opensea	-0.269898	hypo	1	-0.269898
DACT1	387.083	1.44272	0.427707	3.37314	0.000743153	0.00578907	1	cg09250072	Body	shelf	-0.370161	hypo	1	-0.370161
RAB31	3490.3	1.59132	0.480281	3.31332	0.000921965	0.00687538	1	cg13049483	Body	shelf	-0.620775	hypo	1	-0.620775
SORBS3	846.977	1.04787	0.320755	3.26688	0.00108738	0.00785995	1	cg03478916	Body	shore	-0.387284	hypo	1	-0.387284
FAM174B	144.285	2.41832	0.747707	3.23432	0.00121934	0.00859122	1	cg14780990	Body	opensea	-0.234439	hypo	1	-0.234439
USP30	831.321	1.03957	0.326528	3.18369	0.00145408	0.00987141	1	cg03124318	Body	shore	-0.430108	hypo	1	-0.430108
LSR	2100.13	1.12582	0.354591	3.17498	0.00149847	0.0101124	1	cg14747903	Body	island	-0.290924	hypo	1	-0.290924
FNIP1	2313.52	1.13668	0.360376	3.15414	0.00160972	0.0106656	1	cg24629111	Body	opensea	-0.408099	hypo	1	-0.408099
HCST	615.845	1.48522	0.473229	3.13847	0.0016983	0.0111492	1	cg14110548	Body	shelf	-0.421877	hypo	1	-0.421877
KLHL35	12.1375	-1.52135	0.48708	-3.12341	0.00178769	0.0115811	1	cg16547529	Body	shore	0.237424	hyper	1	0.237424
UBASH3A	9.82086	4.62193	1.48296	3.1167	0.0018289	0.0117892	1	cg14174221	Body	opensea	-0.411508	hypo	1	-0.411508
PPP1R13L	85.0792	-1.08371	0.35522	-3.05081	0.00228223	0.0139441	1	cg23397216	Body	island	0.241598	hyper	1	0.241598
IRS2	2166.34	1.50831	0.503271	2.99701	0.00272639	0.0159921	1	cg12085119	Body	shelf	-0.253994	hypo	1	-0.253994
PTMS	491.342	2.47003	0.831234	2.97152	0.0029633	0.0171	1	cg16116203	Body	island	-0.24447	hypo	1	-0.24447
SGCE	635.504	1.58909	0.538032	2.95352	0.00314177	0.0179084	1	cg22579075	Body	opensea	-0.418836	hypo	1	-0.418836
ANKRD53	59.3089	1.27268	0.436884	2.91309	0.0035787	0.0198088	1	cg00421335	Body	island	-0.335143	hypo	1	-0.335143
MYCT1	3.64323	3.67062	1.30206	2.8191	0.00481586	0.0249667	1	cg15961007	Body	opensea	-0.255259	hypo	1	-0.255259
FNDC7	21.7996	2.14241	0.76561	2.7983	0.00513724	0.0262504	1	cg11481351	Body	opensea	-0.41521	hypo	1	-0.41521
APC2	100.228	-1.00123	0.35919	-2.78747	0.00531207	0.0269119	1	cg03165176	Body	island	0.204048	hyper	1	0.204048
PRKCQ	31.3386	2.75518	1.00058	2.75358	0.00589475	0.0291574	1	cg23875854	Body	opensea	-0.227429	hypo	1	-0.227429
ZNF853	557.842	1.28149	0.466429	2.74744	0.00600622	0.0295966	1	cg02216951	Body	shore	-0.330933	hypo	1	-0.330933
VAT1	2997.68	1.22328	0.445762	2.74424	0.0060651	0.0298226	1	cg25070639	Body	shelf	-0.281756	hypo	1	-0.281756
NOP58	6043.76	1.01443	0.372465	2.72357	0.00645804	0.031202	1	cg03128029	Body	opensea	-0.385095	hypo	1	-0.385095
CCNI2	58.5944	1.29027	0.479975	2.6882	0.00718376	0.0337296	1	cg01883408	Body	island	-0.269921	hypo	1	-0.269921
SNORD63	22.2747	1.28874	0.4795	2.68767	0.00719527	0.0337642	1	cg26829184	Body	opensea	-0.274274	hypo	1	-0.274274
DDR2	56.7942	1.3795	0.515892	2.674	0.00749522	0.0347507	1	cg19313373	Body	opensea	-0.247051	hypo	1	-0.247051
TSHZ2	471.676	2.77087	1.03904	2.66676	0.00765857	0.0353469	1	cg02517337	Body	shore	-0.408921	hypo	1	-0.408921
ACSL6	6.01677	3.47413	1.31742	2.63707	0.00836266	0.0378841	1	cg25309041	Body	shelf	-0.38834	hypo	1	-0.38834
LPAR3	34.3119	1.86038	0.705665	2.63635	0.00838041	0.0379343	1	cg07110659	Body	opensea	-0.353225	hypo	1	-0.353225
ZNRF3	72.791	1.10258	0.423898	2.60106	0.00929369	0.0410885	1	cg20080983	Body	shelf	-0.282571	hypo	1	-0.282571
HDAC11	81.9946	1.02237	0.393775	2.59633	0.00942266	0.0415554	1	cg21026460	Body	opensea	-0.629116	hypo	1	-0.629116
NDUFV2	925.501	1.42386	0.554695	2.56693	0.0102604	0.0443301	1	cg15350780	Body	shelf	-0.448378	hypo	1	-0.448378
CABP7	12.217	1.26745	0.49392	2.5661	0.0102849	0.0444221	1	cg10348376	Body	shore	-0.250004	hypo	1	-0.250004

## Sheet: Supplementary Table S8C
DMEGs with DMPs in promoter regions all negative with expression (N = 225)
symbol	baseMean	log2FoldChange	lfcSE	stat	pvalue	padj	DMP_num	DMP_sites	DMP_features	DMP_cgi	DMP_average_deltaBeta	DMP_pro_status	DMP_pro_num	DMP_pro_average_deltabeta
TNXB	17.6938	1.60309	0.526334	3.04576	0.00232091	0.0141108	37	cg00169019;cg00525277;cg00898102;cg02248749;cg02352370;cg02628680;cg04492496;cg05298224;cg06580770;cg07088771;cg07345515;cg08362880;cg08753391;cg10463626;cg10736208;cg10812186;cg10890302;cg10923662;cg12496694;cg13064679;cg13606255;cg13823701;cg14161269;cg14642392;cg16834823;cg18630580;cg20471413;cg22547540;cg23636802;cg24055029;cg24376689;cg24504289;cg24884217;cg25067686;cg26249135;cg26346796;cg2…	Body;Body;Body;Body;Body;Body;Body;Body;Body;Body;Body;Body;Body;Body;TSS1500;Body;Body;Body;Body;Body;Body;TSS1500;Body;Body;Body;Body;Body;Body;Body;Body;Body;Body;Body;TSS1500;Body;Body;Body	shore;island;opensea;opensea;shore;opensea;shelf;opensea;shore;shelf;shore;shore;shelf;shore;opensea;island;island;island;opensea;shelf;shore;opensea;shore;opensea;island;opensea;island;shore;shore;island;opensea;shelf;opensea;opensea;opensea;shore;opensea	-0.265358	hypo	3	-0.320542
SEPT9	24894.3	1.16823	0.325153	3.59288	0.000327046	0.0029841	20	cg01513063;cg02397064;cg05626616;cg06380320;cg06622199;cg07324245;cg10997810;cg13061373;cg14608550;cg17053854;cg17112975;cg17922695;cg18278424;cg19422205;cg19654743;cg20557159;cg20688185;cg20923885;cg21808045;cg26079706	Body;Body;Body;Body;Body;Body;Body;5'UTR;5'UTR;Body;Body;Body;Body;Body;TSS200;Body;5'UTR;Body;Body;Body	opensea;opensea;opensea;shore;opensea;shore;opensea;opensea;shore;opensea;opensea;shelf;opensea;opensea;shore;shelf;opensea;opensea;opensea;opensea	-0.349184	hypo	1	-0.453013
VOPP1	9740.16	2.50071	0.261326	9.56932	1.08e-21	7.13e-19	16	cg05170183;cg05391282;cg06750076;cg06889086;cg07459478;cg09286421;cg12015615;cg13860281;cg14876996;cg15599795;cg15902297;cg16182302;cg16248926;cg23654401;cg24430703;cg26106590	Body;Body;Body;Body;Body;Body;Body;Body;Body;Body;Body;Body;Body;Body;Body;TSS1500	opensea;opensea;opensea;shore;opensea;opensea;opensea;shore;opensea;opensea;opensea;opensea;opensea;opensea;opensea;shore	-0.527266	hypo	1	-0.500984
RBM47	658.984	1.6069	0.335328	4.79203	1.65e-06	3.7e-05	11	cg00511464;cg01704534;cg06332621;cg09141635;cg09249657;cg10459087;cg14160419;cg18183961;cg21151541;cg22056336;cg25117091	5'UTR;5'UTR;TSS1500;5'UTR;TSS1500;5'UTR;5'UTR;TSS1500;TSS1500;5'UTR;5'UTR	opensea;opensea;opensea;opensea;opensea;shelf;opensea;opensea;shore;shelf;opensea	-0.523976	hypo	4	-0.518276
PPP2R2B	7.2849	4.26879	1.39035	3.0703	0.00213842	0.0133013	10	cg02154084;cg03653855;cg05576845;cg08715720;cg08991927;cg12524428;cg13301454;cg15021031;cg17342759;cg18899516	Body;5'UTR;Body;Body;5'UTR;5'UTR;Body;5'UTR;TSS1500;Body	opensea;opensea;opensea;opensea;opensea;opensea;opensea;opensea;opensea;opensea	-0.368383	hypo	1	-0.294353
APBA2	19.6911	5.16856	1.33639	3.86754	0.000109939	0.00123299	9	cg01863596;cg02331808;cg07148167;cg07699300;cg08908089;cg12395299;cg15885043;cg23914328;cg27184903	Body;5'UTR;Body;Body;TSS1500;Body;Body;Body;5'UTR	opensea;opensea;shelf;shelf;opensea;opensea;opensea;shelf;opensea	-0.306197	hypo	1	-0.291995
ROR1	2649.69	5.01299	0.427663	11.7218	9.85e-32	2.34e-28	8	cg00327437;cg03140289;cg03937361;cg03950655;cg06743782;cg07579123;cg07797372;cg24502478	Body;Body;Body;Body;Body;Body;Body;TSS1500	opensea;opensea;opensea;opensea;opensea;opensea;opensea;shore	-0.4029	hypo	1	-0.331456
PRDM2	24520.2	1.58608	0.288944	5.48922	4.04e-08	1.49e-06	8	cg07708453;cg11750706;cg19359071;cg23267665;cg24715767;cg25402049;cg25450806;cg26063625	1stExon;Body;TSS1500;TSS1500;Body;TSS1500;1stExon;Body	opensea;shore;shelf;shelf;opensea;shelf;opensea;shore	-0.439301	hypo	5	-0.449332
DLG2	467.781	3.41714	0.652559	5.23653	1.64e-07	4.99e-06	8	cg02675969;cg04923194;cg05174766;cg05405389;cg08432013;cg18023263;cg22907295;cg23424158	Body;TSS1500;Body;Body;Body;Body;Body;TSS1500	opensea;opensea;opensea;opensea;opensea;opensea;opensea;opensea	-0.385423	hypo	2	-0.482131
IPCEF1	239.942	3.00744	0.700042	4.29609	1.74e-05	0.000265815	8	cg02864954;cg10276116;cg14295437;cg19690214;cg19963522;cg24635109;cg24873280;cg26415516	Body;Body;5'UTR;TSS1500;5'UTR;5'UTR;5'UTR;3'UTR	opensea;opensea;opensea;opensea;opensea;opensea;opensea;opensea	-0.626115	hypo	1	-0.442023
AHNAK	118212	1.24169	0.29221	4.2493	2.14e-05	0.000316017	8	cg05427381;cg06219806;cg09183450;cg13282971;cg14171514;cg16509239;cg23447569;cg26484813	5'UTR;5'UTR;5'UTR;5'UTR;5'UTR;Body;TSS1500;5'UTR	shelf;opensea;opensea;shelf;opensea;shore;shore;shore	-0.415199	hypo	1	-0.327525
TIGIT	816.344	2.69306	0.452389	5.95297	2.63e-09	1.38e-07	7	cg09246203;cg13669740;cg19421218;cg19456938;cg20832020;cg22577252;cg22870429	Body;5'UTR;TSS200;TSS200;1stExon;TSS1500;3'UTR	opensea;opensea;opensea;opensea;opensea;opensea;opensea	-0.586218	hypo	4	-0.589771
LIMCH1	213.63	6.98326	1.22593	5.6963	1.22e-08	5.3e-07	7	cg00957901;cg03704407;cg08125181;cg09018824;cg19761245;cg20253212;cg22204103	TSS200;Body;TSS1500;TSS1500;Body;Body;Body	opensea;opensea;shore;shore;shelf;opensea;opensea	-0.249667	hypo	3	-0.35541
SNX18	4859.36	2.10316	0.410848	5.11907	3.07e-07	8.63e-06	7	cg01582396;cg08544436;cg14684434;cg14952488;cg16358034;cg21995347;cg23001370	Body;1stExon;Body;Body;1stExon;1stExon;Body	shelf;island;opensea;opensea;island;island;shore	-0.555558	hypo	3	-0.490287
CPEB4	4009.58	1.21001	0.292334	4.13915	3.49e-05	0.000473524	7	cg03032025;cg06889108;cg12665414;cg16290431;cg18693985;cg18757087;cg25122699	1stExon;1stExon;Body;Body;Body;1stExon;TSS1500	shore;shore;shelf;opensea;opensea;shore;shore	-0.427744	hypo	4	-0.432969
MACROD2	429.19	-2.41769	0.620373	-3.89716	9.73e-05	0.00111469	7	cg01552272;cg04476531;cg04624110;cg23169957;cg25557432;cg25697357;cg26059153	TSS200;5'UTR;TSS200;TSS200;TSS200;Body;1stExon	island;opensea;island;island;island;shelf;island	0.165418	hyper	5	0.331626
ADAMTS17	4.27527	-3.19952	0.889887	-3.59542	0.000323868	0.0029612	7	cg00149679;cg03300787;cg04822808;cg05027458;cg20941820;cg21314318;cg27344315	Body;Body;5'UTR;5'UTR;TSS200;Body;Body	opensea;island;island;island;island;opensea;opensea	-0.0247326	hyper	1	0.262116
TMPRSS6	42.1571	1.00326	0.373233	2.68803	0.00718744	0.0337413	7	cg05754122;cg16971128;cg17745234;cg17956747;cg18617091;cg19979738;cg21188731	TSS200;TSS200;1stExon;Body;Body;Body;Body	opensea;opensea;opensea;shelf;shore;shelf;shelf	-0.525201	hypo	3	-0.516374
LAG3	564.503	7.29935	0.976457	7.47534	7.7e-14	1.09e-11	6	cg01820374;cg04153135;cg04671742;cg19421125;cg20652042;cg22777668	Body;TSS1500;1stExon;Body;Body;TSS1500	shore;shore;shore;island;shore;shore	-0.304192	hypo	3	-0.357725
LAX1	2204.71	1.98137	0.285069	6.95047	3.64e-12	3.77e-10	6	cg00942920;cg06958535;cg12022621;cg17711527;cg23893629;cg25625457	Body;1stExon;1stExon;1stExon;TSS1500;TSS1500	opensea;opensea;opensea;opensea;opensea;opensea	-0.504087	hypo	5	-0.523026
SERINC5	852.335	2.83495	0.42075	6.73787	1.61e-11	1.44e-09	6	cg01267797;cg07172701;cg10531355;cg14711743;cg19683073;cg22422937	Body;Body;Body;Body;TSS1500;Body	opensea;opensea;opensea;opensea;shore;opensea	-0.423396	hypo	1	-0.260395
ATP1A1	7423.41	1.02325	0.217492	4.70477	2.54e-06	5.33e-05	6	cg04403423;cg17107017;cg17469276;cg18026772;cg20309677;cg25346117	Body;TSS1500;TSS1500;Body;TSS1500;Body	shore;opensea;opensea;opensea;opensea;opensea	-0.544387	hypo	3	-0.669352
EZR	46888.5	1.59895	0.375898	4.25369	2.1e-05	0.00031117	6	cg13026729;cg13433729;cg15118447;cg15481472;cg16978168;cg23496730	TSS1500;Body;Body;Body;Body;Body	island;opensea;opensea;opensea;opensea;opensea	-0.515497	hypo	1	-0.346499
DLGAP4	4047.82	1.10621	0.289464	3.82159	0.000132595	0.00143328	6	cg00159764;cg01982835;cg12492027;cg15730121;cg17566560;cg24216770	5'UTR;TSS200;TSS1500;Body;Body;Body	shore;opensea;shore;shelf;opensea;shore	-0.488107	hypo	2	-0.425426
TGFBI	5077.42	6.89351	0.67714	10.1803	2.43e-24	2.38e-21	5	cg05838308;cg09096234;cg10648763;cg21550219;cg21583694	Body;Body;TSS200;Body;Body	shelf;shore;shore;opensea;shore	-0.357637	hypo	1	-0.337907
COL9A2	4117.02	2.17713	0.346303	6.28677	3.24e-10	2.11e-08	5	cg02961012;cg04100190;cg07063183;cg10512203;cg12733396	Body;TSS1500;Body;Body;TSS1500	shore;shore;shore;shore;shore	-0.384642	hypo	2	-0.426594
RASGRF1	2929.56	2.65764	0.439117	6.05224	1.43e-09	8.01e-08	5	cg02587988;cg06376992;cg21840434;cg22821300;cg24231513	Body;Body;1stExon;Body;TSS1500	opensea;opensea;opensea;opensea;opensea	-0.415451	hypo	2	-0.380712
LITAF	8447.96	1.36279	0.336322	4.05204	5.08e-05	0.000650295	5	cg01267165;cg02051924;cg03071793;cg07143635;cg07994696	TSS1500;TSS200;TSS1500;TSS200;5'UTR	shore;shore;shore;shore;island	-0.350472	hypo	4	-0.347318
C8orf46	95.1534	2.4139	0.673776	3.58264	0.00034014	0.00308031	5	cg06890415;cg09622557;cg10635330;cg15070801;cg15798873	TSS200;Body;TSS200;Body;Body	opensea;island;opensea;island;island	-0.524811	hypo	2	-0.311209
SPEF2	9.54297	-3.30645	0.940497	-3.51564	0.000438691	0.00377468	5	cg01581237;cg08534016;cg08621406;cg27003682;cg27664901	TSS200;Body;Body;TSS200;Body	island;opensea;island;island;shelf	0.0344104	hyper	2	0.223509
LILRA4	1427.44	2.70882	0.7967	3.40006	0.000673721	0.00534769	5	cg02434051;cg03575041;cg20542190;cg23899409;cg24755177	Body;TSS1500;TSS200;TSS200;TSS1500	opensea;opensea;opensea;opensea;opensea	-0.450387	hypo	4	-0.441067
TJP1	1.63562	-6.10985	2.01187	-3.03691	0.0023902	0.0144304	5	cg06525993;cg09812397;cg12685846;cg16225947;cg19965221	Body;Body;TSS200;Body;5'UTR	opensea;opensea;island;opensea;island	-0.0855096	hyper	1	0.21704
BTBD19	122.236	1.50972	0.540033	2.79561	0.00518025	0.0264275	5	cg00043599;cg02923972;cg12275060;cg14565781;cg17093466	Body;Body;Body;1stExon;Body	shelf;shore;island;shelf;shelf	-0.496311	hypo	1	-0.503113
ACSBG1	29.3229	1.10542	0.431484	2.56191	0.0104098	0.044812	5	cg05399703;cg13642872;cg14517390;cg27087809;cg27257408	TSS1500;TSS1500;3'UTR;TSS1500;1stExon	opensea;opensea;opensea;opensea;opensea	-0.374264	hypo	4	-0.283763
EPS8L2	365.853	1.07329	0.42308	2.53685	0.0111856	0.0473472	5	cg01963374;cg13555772;cg17469934;cg18770763;cg23856257	TSS1500;TSS1500;Body;Body;Body	shore;shore;shore;shore;shore	-0.325486	hypo	2	-0.258884
CDK14	9555.5	2.03998	0.227395	8.97106	2.94e-19	1.21e-16	4	cg03834767;cg09781028;cg15798153;cg21700774	3'UTR;Body;1stExon;Body	opensea;opensea;opensea;opensea	-0.591	hypo	1	-0.508467
SPOCK2	26570	2.54855	0.297632	8.56276	1.1e-17	3.23e-15	4	cg02909446;cg12752647;cg13665981;cg15331996	TSS1500;TSS1500;TSS1500;TSS200	shore;shore;shore;shore	-0.47838	hypo	4	-0.47838
BMF	11340.8	1.9556	0.2435	8.03122	9.65e-16	2.05e-13	4	cg07712904;cg07887985;cg18494902;cg26662201	Body;TSS200;TSS1500;TSS200	opensea;shelf;shelf;shelf	-0.446987	hypo	3	-0.493455
NOD2	1078.03	3.04917	0.426776	7.14466	9.02e-13	1.07e-10	4	cg04172533;cg08554257;cg16771652;cg26954174	Body;TSS1500;TSS1500;TSS1500	opensea;opensea;opensea;opensea	-0.389864	hypo	3	-0.422541
FHDC1	531.408	3.75591	0.576058	6.52002	7.03e-11	5.41e-09	4	cg00170487;cg01674147;cg07097184;cg18902697	Body;Body;3'UTR;TSS1500	opensea;opensea;shelf;shelf	-0.37992	hypo	1	-0.229307
ABI1	7498.29	1.06731	0.168946	6.31746	2.66e-10	1.77e-08	4	cg03625292;cg17850367;cg18825419;cg26142490	Body;TSS1500;TSS1500;Body	shore;shore;shore;opensea	-0.490419	hypo	2	-0.398696
DCLK2	2015.21	3.40354	0.54026	6.29982	2.98e-10	1.96e-08	4	cg03779973;cg05561193;cg10190898;cg12115081	Body;TSS1500;Body;Body	shore;shore;opensea;opensea	-0.537018	hypo	1	-0.44877
APOBEC3H	94.7307	2.23905	0.357132	6.26952	3.62e-10	2.34e-08	4	cg06229674;cg17972162;cg18696237;cg24424889	TSS1500;Body;TSS1500;5'UTR	opensea;opensea;opensea;opensea	-0.505969	hypo	2	-0.521607
PLBD1	518.948	3.44251	0.568871	6.05148	1.44e-09	8.03e-08	4	cg04473902;cg07634645;cg11905611;cg25642234	TSS1500;TSS200;TSS200;TSS1500	shore;island;island;island	-0.33504	hypo	4	-0.33504
CHST15	3686.82	1.8585	0.310291	5.98954	2.1e-09	1.13e-07	4	cg06034255;cg08082692;cg17606491;cg26306435	TSS1500;1stExon;TSS200;1stExon	shelf;shore;shelf;shore	-0.36966	hypo	4	-0.36966
TGIF1	2316.48	1.71077	0.288356	5.93283	2.98e-09	1.53e-07	4	cg07529654;cg13224710;cg25385819;cg26701815	5'UTR;TSS1500;5'UTR;5'UTR	shore;opensea;shelf;shore	-0.433173	hypo	1	-0.29073
LGR6	158.749	3.28525	0.573175	5.73167	9.94e-09	4.41e-07	4	cg04811114;cg12761421;cg13385220;cg26347746	TSS200;Body;Body;TSS200	opensea;opensea;opensea;opensea	-0.183646	hypo	2	-0.233374
ZC3H7A	5509.65	1.16914	0.20743	5.63632	1.74e-08	7.26e-07	4	cg04010868;cg09095525;cg14959707;cg26521448	5'UTR;Body;5'UTR;TSS200	opensea;opensea;opensea;opensea	-0.522509	hypo	1	-0.568794
MET	11.989	-8.60987	1.57063	-5.48178	4.21e-08	1.54e-06	4	cg11319403;cg22116492;cg24197567;cg24627299	Body;Body;Body;TSS1500	opensea;opensea;opensea;shore	-0.152462	hyper	1	0.211299
PBX2	840.409	1.09109	0.209934	5.19728	2.02e-07	5.96e-06	4	cg03280235;cg04363228;cg16609995;cg20765522	TSS1500;Body;TSS1500;Body	opensea;opensea;opensea;opensea	-0.408424	hypo	2	-0.408092
ZAP70	1690.09	2.90127	0.59531	4.87354	1.1e-06	2.62e-05	4	cg08859278;cg09006159;cg14537825;cg15933451	TSS1500;TSS1500;Body;TSS200	opensea;opensea;shelf;opensea	-0.300275	hypo	3	-0.327852
KCNN4	9547.52	1.43665	0.332894	4.31562	1.59e-05	0.000247213	4	cg04833845;cg18506018;cg24900654;cg26890181	TSS1500;TSS1500;TSS200;TSS1500	opensea;opensea;opensea;opensea	-0.534148	hypo	4	-0.534148
ZBTB32	2006.97	1.44697	0.353962	4.08792	4.35e-05	0.000574189	4	cg03068068;cg08539991;cg09231418;cg21062760	TSS1500;5'UTR;TSS1500;Body	shelf;shelf;opensea;shore	-0.475229	hypo	2	-0.420183
PLK3	1403.11	1.39926	0.343258	4.0764	4.57e-05	0.000597509	4	cg07368443;cg08259083;cg17233819;cg27583604	TSS1500;Body;Body;Body	shore;shelf;island;shore	-0.524021	hypo	1	-0.307996
GPD2	1910.02	1.09804	0.285545	3.84541	0.00012035	0.00132307	4	cg03230175;cg19062174;cg23077884;cg23836163	TSS1500;5'UTR;Body;Body	shore;opensea;opensea;opensea	-0.512604	hypo	1	-0.422024
SLC7A7	3175.2	1.1028	0.294512	3.74451	0.000180743	0.00184514	4	cg02999224;cg15070897;cg18960218;cg19872681	5'UTR;5'UTR;TSS1500;5'UTR	opensea;opensea;opensea;opensea	-0.445652	hypo	1	-0.223624
CD36	57.2006	4.77829	1.30567	3.65965	0.000252557	0.00243179	4	cg18508525;cg19096849;cg26138637;cg27625491	TSS1500;TSS1500;5'UTR;TSS1500	opensea;opensea;opensea;opensea	-0.378043	hypo	3	-0.397986
AZU1	42.4366	2.37426	0.729292	3.25556	0.00113168	0.00810022	4	cg02147126;cg10752406;cg14663914;cg15610437	TSS200;TSS200;TSS200;TSS200	opensea;opensea;opensea;opensea	-0.394757	hypo	4	-0.394757
CD44	12915.6	1.08692	0.347814	3.125	0.00177804	0.0115344	4	cg02663352;cg06975166;cg14593191;cg25096745	Body;TSS1500;Body;Body	opensea;shore;opensea;opensea	-0.403444	hypo	1	-0.302966
FGR	10302	1.11194	0.378965	2.93416	0.00334447	0.0188189	4	cg00404394;cg03018771;cg09845000;cg16897005	5'UTR;Body;TSS1500;TSS1500	shore;shore;shore;shore	-0.38543	hypo	2	-0.423016
DNAJB13	767.209	1.07999	0.372185	2.90177	0.00371063	0.0204074	4	cg04044120;cg13953458;cg19692710;cg20071670	Body;3'UTR;1stExon;1stExon	opensea;opensea;opensea;opensea	-0.388584	hypo	2	-0.373434
THEMIS	22.9339	4.33146	1.63389	2.65101	0.00802522	0.0367709	4	cg11610626;cg21326251;cg25269388;cg27638432	5'UTR;5'UTR;Body;TSS1500	opensea;opensea;opensea;opensea	-0.290983	hypo	1	-0.220298
AKR1D1	1.68505	2.57911	1.01171	2.54927	0.0107948	0.0460655	4	cg05082563;cg15002691;cg17257469;cg25271841	Body;TSS200;Body;TSS1500	opensea;opensea;opensea;opensea	-0.36503	hypo	2	-0.444564
APOD	1427.74	8.27867	0.933764	8.86591	7.59e-19	2.74e-16	3	cg05624196;cg21762680;cg23720929	1stExon;3'UTR;1stExon	opensea;opensea;opensea	-0.500653	hypo	2	-0.622492
CASS4	314.038	4.59897	0.526486	8.73522	2.43e-18	8.05e-16	3	cg00387658;cg24519157;cg26712809	TSS1500;Body;TSS1500	opensea;opensea;opensea	-0.466934	hypo	2	-0.409695
SRGAP3	278.003	2.68537	0.379762	7.07119	1.54e-12	1.72e-10	3	cg13475822;cg26184741;cg26389316	Body;TSS1500;Body	opensea;opensea;opensea	-0.514792	hypo	1	-0.463749
IGFBP4	4327.72	4.10052	0.616421	6.65215	2.89e-11	2.48e-09	3	cg02627216;cg11961138;cg17980404	TSS1500;TSS1500;Body	shore;island;shore	-0.346626	hypo	2	-0.284212
IL10RA	19176	1.88931	0.287369	6.57449	4.88e-11	3.96e-09	3	cg05468843;cg07237926;cg26661481	Body;Body;TSS1500	shore;shore;shore	-0.4352	hypo	1	-0.405402
ABCG1	2112.07	1.84712	0.306497	6.02656	1.67e-09	9.17e-08	3	cg00177237;cg05046272;cg20214535	Body;TSS1500;TSS1500	shelf;opensea;opensea	-0.627887	hypo	2	-0.59008
SERPINF1	1108.03	2.29629	0.431492	5.32174	1.03e-07	3.35e-06	3	cg00777079;cg06940127;cg22242539	5'UTR;1stExon;TSS200	opensea;opensea;opensea	-0.447105	hypo	2	-0.325755
SH2D1B	38.6925	6.60305	1.30206	5.07124	3.95e-07	1.08e-05	3	cg01062020;cg15617640;cg26379475	TSS1500;Body;1stExon	opensea;opensea;opensea	-0.312237	hypo	2	-0.332557
B4GALT1	12575.2	1.18307	0.234683	5.04116	4.63e-07	1.23e-05	3	cg05779272;cg13858803;cg14080050	TSS1500;Body;Body	shore;opensea;opensea	-0.339393	hypo	1	-0.36777
TK2	255.135	1.346	0.267496	5.03185	4.86e-07	1.29e-05	3	cg00187129;cg07512993;cg09238666	Body;Body;TSS200	shelf;shore;shore	-0.654569	hypo	1	-0.645784
MAPKAPK2	8038.74	1.3566	0.270264	5.01954	5.18e-07	1.36e-05	3	cg08055786;cg24141516;cg25741609	TSS1500;Body;Body	shore;opensea;opensea	-0.492231	hypo	1	-0.557387
CAPN9	27.9704	5.37563	1.10028	4.88568	1.03e-06	2.48e-05	3	cg00563566;cg03704061;cg06585893	1stExon;1stExon;Body	opensea;opensea;opensea	-0.330591	hypo	2	-0.2546
OSBPL5	333.539	5.24125	1.10788	4.73089	2.24e-06	4.79e-05	3	cg01418188;cg06131936;cg20511548	Body;TSS1500;5'UTR	shelf;shore;shelf	-0.339393	hypo	1	-0.422132
FGF2	336.091	3.96737	0.875353	4.53231	5.83e-06	0.000107375	3	cg11327857;cg21550024;cg24683623	TSS1500;TSS1500;TSS1500	shore;shore;shore	-0.291576	hypo	3	-0.291576
SLA2	140.612	2.05812	0.467747	4.40006	1.08e-05	0.000179875	3	cg09191335;cg14329026;cg21565575	3'UTR;TSS1500;5'UTR	opensea;opensea;opensea	-0.352804	hypo	1	-0.386955
GSDMA	20.4203	3.98756	0.920946	4.32986	1.49e-05	0.000234706	3	cg21790570;cg24910161;cg26162295	3'UTR;TSS200;TSS200	shelf;opensea;opensea	-0.437686	hypo	2	-0.517708
FRK	303.123	3.19848	0.811816	3.93991	8.15e-05	0.00095942	3	cg06127202;cg16176600;cg23628721	Body;1stExon;Body	opensea;opensea;opensea	-0.475933	hypo	1	-0.333326
CLEC7A	91.9216	4.0551	1.08589	3.73435	0.0001882	0.00190896	3	cg21250433;cg23892568;cg26066361	TSS1500;TSS200;1stExon	opensea;opensea;opensea	-0.394757	hypo	3	-0.394757
SULF2	1035.97	1.56169	0.420925	3.71015	0.00020714	0.00206429	3	cg04898124;cg21500064;cg25401628	5'UTR;TSS1500;TSS1500	shelf;shore;shore	-0.32988	hypo	2	-0.37746
GRB7	95.3352	2.73638	0.753401	3.63204	0.000281191	0.00265427	3	cg00697095;cg08284496;cg14575854	5'UTR;TSS1500;5'UTR	opensea;opensea;opensea	-0.323143	hypo	1	-0.239689
CKLF	157.517	1.02047	0.284272	3.58978	0.000330961	0.00301251	3	cg02295216;cg04701716;cg09728392	TSS1500;Body;TSS1500	shore;shelf;shore	-0.285432	hypo	2	-0.256917
TBC1D1	9531.78	1.10204	0.322931	3.41262	0.000643414	0.00516036	3	cg04710179;cg05196835;cg08266311	TSS1500;Body;Body	shore;opensea;opensea	-0.345963	hypo	1	-0.299911
SPARC	186.774	3.89821	1.1594	3.36226	0.000773077	0.00598289	3	cg07539983;cg13319042;cg23174201	TSS1500;TSS1500;Body	opensea;opensea;opensea	-0.303484	hypo	2	-0.347426
OSBPL1A	11.8047	-2.64398	0.802909	-3.293	0.000991261	0.00729093	3	cg05709468;cg23742217;cg25983589	Body;Body;TSS1500	opensea;shore;island	-0.256359	hyper	1	0.249289
MBNL2	1853.06	1.05663	0.345961	3.0542	0.00225665	0.0138472	3	cg02838877;cg06340704;cg24714606	TSS1500;5'UTR;Body	opensea;opensea;opensea	-0.328526	hypo	1	-0.365726
MMP14	358.562	1.15024	0.377138	3.04991	0.00228906	0.0139715	3	cg10418289;cg13094752;cg27020028	Body;TSS1500;TSS1500	shore;shore;shore	-0.283361	hypo	2	-0.248396
LCP2	1131.82	1.31682	0.432957	3.04145	0.00235438	0.0142625	3	cg02676052;cg05265596;cg08748308	TSS1500;Body;Body	opensea;opensea;opensea	-0.370491	hypo	1	-0.276814
SYN2	0.910673	-4.68342	1.57227	-2.97876	0.00289417	0.0167929	3	cg10110335;cg16858253;cg20888142	Body;Body;TSS200	shelf;shelf;island	-0.0816667	hyper	1	0.371755
FKBP5	2191.61	1.3763	0.46249	2.97586	0.00292171	0.0169251	3	cg00130530;cg07061368;cg08915438	5'UTR;5'UTR;TSS1500	shore;opensea;shore	-0.356417	hypo	1	-0.241482
IL24	6278.07	1.14778	0.405591	2.8299	0.00465628	0.0243076	3	cg06796611;cg16417028;cg23909633	1stExon;1stExon;TSS1500	opensea;opensea;opensea	-0.517173	hypo	3	-0.517173
CTLA4	4506.14	8.30965	0.746503	11.1314	8.82e-29	1.32e-25	2	cg05074138;cg26091609	1stExon;Body	opensea;opensea	-0.660621	hypo	1	-0.625751
CD5	3707.01	3.74433	0.487731	7.67704	1.63e-14	2.74e-12	2	cg22202088;cg27301655	Body;TSS1500	opensea;opensea	-0.351412	hypo	1	-0.362705
NDFIP1	2442.47	1.31526	0.178571	7.36549	1.77e-13	2.4e-11	2	cg08523384;cg23435118	TSS1500;TSS1500	shore;shore	-0.38404	hypo	2	-0.38404
PKMYT1	20.1735	-6.79724	0.929388	-7.31367	2.6e-13	3.38e-11	2	cg02510853;cg14005217	TSS1500;5'UTR	shore;island	-0.0652097	hyper	1	0.269361
KCNG2	4.03358	-3.93584	0.648877	-6.06561	1.31e-09	7.44e-08	2	cg23825213;cg25458083	TSS200;Body	island;shelf	-0.0355192	hyper	1	0.213054
SERPINA1	206.922	6.25279	1.03181	6.06	1.36e-09	7.69e-08	2	cg13826459;cg24621042	TSS1500;TSS1500	opensea;opensea	-0.30716	hypo	2	-0.30716
ERN1	1080.05	1.58166	0.269102	5.87756	4.16e-09	2.04e-07	2	cg12779575;cg20998539	TSS1500;TSS1500	shore;shore	-0.495682	hypo	2	-0.495682
ST6GALNAC6	3166.05	1.24487	0.211901	5.87476	4.23e-09	2.06e-07	2	cg05517711;cg14533412	TSS1500;3'UTR	shore;opensea	-0.471233	hypo	1	-0.442
ZNF844	2078.43	1.35013	0.235786	5.72607	1.03e-08	4.55e-07	2	cg09772831;cg12210543	TSS1500;TSS1500	shore;shore	-0.357817	hypo	2	-0.357817
UGCG	7331.46	1.21733	0.223087	5.45674	4.85e-08	1.75e-06	2	cg01472113;cg14278148	TSS1500;Body	shore;shelf	-0.631584	hypo	1	-0.649498
WASF2	15802.4	1.28275	0.237855	5.39301	6.93e-08	2.39e-06	2	cg24162579;cg24926121	TSS1500;5'UTR	shore;opensea	-0.422557	hypo	1	-0.393567
DERL1	3940.81	1.09555	0.210481	5.205	1.94e-07	5.78e-06	2	cg14743346;cg21139496	Body;TSS1500	shelf;shore	-0.386352	hypo	1	-0.392386
PLCL2	6493.27	1.12703	0.217218	5.1885	2.12e-07	6.2e-06	2	cg02356435;cg15605530	TSS1500;Body	island;opensea	-0.376686	hypo	1	-0.269093
CPEB1	57.196	3.37713	0.659729	5.11896	3.07e-07	8.63e-06	2	cg00937012;cg11022060	TSS1500;Body	opensea;opensea	-0.302327	hypo	1	-0.372889
FBXO27	137.299	3.81006	0.78581	4.84857	1.24e-06	2.92e-05	2	cg02992311;cg08404221	TSS1500;TSS200	shore;shore	-0.41138	hypo	2	-0.41138
FCER1G	99.1285	3.59683	0.749345	4.79996	1.59e-06	3.59e-05	2	cg20609803;cg20806175	TSS1500;Body	opensea;opensea	-0.632593	hypo	1	-0.744382
ZNF107	7283.94	1.15918	0.246074	4.71071	2.47e-06	5.2e-05	2	cg12856392;cg21985076	TSS1500;5'UTR	shore;shelf	-0.560175	hypo	1	-0.431973
RIT1	1780.4	1.23684	0.263456	4.69468	2.67e-06	5.59e-05	2	cg08256691;cg13795986	TSS1500;Body	opensea;opensea	-0.375548	hypo	1	-0.525311
AP1S3	1369.96	1.34079	0.286791	4.67516	2.94e-06	6.03e-05	2	cg06751322;cg07813214	Body;TSS1500	opensea;shore	-0.470883	hypo	1	-0.393175
PELI1	16162.2	1.74045	0.384545	4.52599	6.01e-06	0.000109854	2	cg08471738;cg13101088	TSS1500;3'UTR	shore;opensea	-0.567092	hypo	1	-0.394932
KCNJ11	380.572	2.13832	0.485752	4.40208	1.07e-05	0.000178518	2	cg03864215;cg05185584	3'UTR;1stExon	shore;shore	-0.256434	hypo	1	-0.284977
S100A8	358.584	5.27954	1.28049	4.12307	3.74e-05	0.00050375	2	cg09174555;cg20256009	TSS1500;5'UTR	opensea;opensea	-0.360664	hypo	1	-0.443003
WHAMM	4438.64	1.77656	0.436441	4.07056	4.69e-05	0.000609784	2	cg00225006;cg21386933	TSS200;TSS1500	shore;shore	-0.353851	hypo	2	-0.353851
KLRD1	65.2803	5.16378	1.28498	4.01856	5.86e-05	0.000733159	2	cg00059699;cg05377120	TSS1500;TSS200	opensea;opensea	-0.470133	hypo	2	-0.470133
GLDN	56.3491	4.73664	1.20332	3.93631	8.27e-05	0.000972921	2	cg05303280;cg05404865	TSS1500;Body	shore;opensea	-0.406968	hypo	1	-0.519111
CABLES1	746.143	2.78265	0.711463	3.91116	9.19e-05	0.00106195	2	cg22158648;cg26052586	TSS1500;Body	shore;shore	-0.447668	hypo	1	-0.484125
TUSC1	2.69036	-5.34152	1.38768	-3.84923	0.000118488	0.0013091	2	cg00781519;cg13811417	1stExon;1stExon	island;island	0.295783	hyper	2	0.295783
GZMB	77.4233	3.94213	1.03378	3.81332	0.00013711	0.0014698	2	cg03875678;cg18118198	TSS200;Body	opensea;opensea	-0.314084	hypo	1	-0.385307
ELF1	11646.7	1.07264	0.282776	3.79324	0.000148693	0.00156916	2	cg12691679;cg25878131	TSS1500;TSS1500	opensea;opensea	-0.493043	hypo	2	-0.493043
PHF13	818.697	1.11561	0.305728	3.64902	0.000263245	0.00251093	2	cg06778853;cg12907598	TSS1500;Body	shore;shore	-0.51102	hypo	1	-0.416149
AGBL4	5.7478	-1.68932	0.466836	-3.61865	0.000296139	0.00275906	2	cg16515477;cg21834207	Body;TSS1500	opensea;island	-0.0865035	hyper	1	0.220409
KIFC3	58.5608	3.13826	0.896753	3.49958	0.000465992	0.0039617	2	cg26819611;cg27026192	5'UTR;TSS1500	shelf;island	-0.262191	hypo	1	-0.270065
FCRL6	42.722	3.74114	1.12118	3.33678	0.000847546	0.00644362	2	cg00936728;cg25698205	1stExon;TSS200	opensea;opensea	-0.5486	hypo	2	-0.5486
CLU	148.538	3.86012	1.15751	3.33484	0.000853472	0.00648001	2	cg02393097;cg13620439	TSS1500;Body	shore;opensea	-0.396275	hypo	1	-0.401099
SNX9	4697.37	1.57883	0.474666	3.32619	0.000880405	0.00664024	2	cg04064963;cg15264757	TSS1500;Body	shore;opensea	-0.344671	hypo	1	-0.442546
IL2RA	1702.75	1.66605	0.502303	3.31682	0.000910493	0.00681482	2	cg26105232;cg26316423	TSS1500;1stExon	opensea;opensea	-0.446759	hypo	2	-0.446759
POU5F1	14.3539	2.17566	0.66336	3.27976	0.00103896	0.00758296	2	cg07764829;cg15316118	1stExon;Body	opensea;opensea	-0.669879	hypo	1	-0.733679
C1R	73.1901	1.40933	0.431409	3.26681	0.00108765	0.00785995	2	cg15837470;cg23368715	3'UTR;TSS1500	opensea;opensea	-0.262374	hypo	1	-0.309688
TBX21	557.583	1.20261	0.372465	3.22877	0.00124323	0.00871211	2	cg08670136;cg16928046	TSS1500;Body	shore;shore	-0.50015	hypo	1	-0.352231
STXBP5L	1.08105	-5.51732	1.79204	-3.07879	0.00207846	0.0130062	2	cg00065935;cg10943458	1stExon;1stExon	island;island	0.213209	hyper	2	0.213209
RLF	3876.56	1.09666	0.359064	3.05421	0.0022565	0.0138472	2	cg18646240;cg20929609	TSS1500;TSS1500	shore;shore	-0.340937	hypo	2	-0.340937
LTK	870.266	1.75027	0.573202	3.05349	0.00226193	0.0138677	2	cg03321553;cg18168740	TSS200;Body	shore;shelf	-0.28216	hypo	1	-0.346065
MOGAT2	8.15458	3.88131	1.27289	3.04922	0.00229435	0.0139912	2	cg20938170;cg25255988	TSS200;TSS200	opensea;opensea	-0.383846	hypo	2	-0.383846
ME3	6.43089	-2.51522	0.836028	-3.00853	0.00262511	0.0155195	2	cg14883291;cg22266072	TSS1500;Body	shore;opensea	-0.000286625	hyper	1	0.25785
PDE1B	862.382	1.39956	0.4656	3.00594	0.00264763	0.01563	2	cg06793728;cg21370074	TSS1500;TSS1500	opensea;opensea	-0.41665	hypo	2	-0.41665
AIF1	63.3215	1.92323	0.648866	2.96398	0.00303687	0.0174573	2	cg15343510;cg24211388	TSS1500;TSS1500	opensea;opensea	-0.376572	hypo	2	-0.376572
ACSM5	2.03991	2.80049	0.973495	2.87674	0.00401804	0.0216764	2	cg06686156;cg10938486	TSS1500;TSS200	opensea;opensea	-0.484204	hypo	2	-0.484204
ITGAX	5776.12	1.39063	0.491568	2.82897	0.00466985	0.0243606	2	cg04742550;cg05644767	TSS200;TSS1500	opensea;opensea	-0.356485	hypo	2	-0.356485
SCNN1A	5.50878	2.63478	0.932471	2.82559	0.00471935	0.0245558	2	cg22245858;cg26244013	TSS200;Body	opensea;shelf	-0.403544	hypo	1	-0.252127
CAND2	148.468	1.11404	0.398941	2.79251	0.00523014	0.0265915	2	cg00351152;cg11200930	TSS1500;Body	shore;shore	-0.378551	hypo	1	-0.308108
RAB43	132.013	1.52255	0.549543	2.77057	0.00559589	0.0280702	2	cg01313358;cg05859076	TSS1500;Body	shore;shore	-0.361696	hypo	1	-0.353556
FMOD	13258.2	10.0459	0.734912	13.6695	1.54e-42	8.79e-39	1	cg04704856	1stExon	opensea	-0.375963	hypo	1	-0.375963
CLNK	6269.28	4.87421	0.50953	9.56609	1.11e-21	7.18e-19	1	cg03485217	1stExon	opensea	-0.425651	hypo	1	-0.425651
ABCA9	3434.06	5.273	0.640175	8.2368	1.77e-16	4.38e-14	1	cg01517431	TSS1500	opensea	-0.490615	hypo	1	-0.490615
SFTPB	657.605	6.08111	0.831005	7.31777	2.52e-13	3.32e-11	1	cg07313956	TSS200	opensea	-0.515787	hypo	1	-0.515787
UBE2E3	1200.24	1.50407	0.218266	6.89101	5.54e-12	5.55e-10	1	cg04166432	TSS1500	shore	-0.348766	hypo	1	-0.348766
FER1L4	916.898	5.2088	0.768816	6.77509	1.24e-11	1.16e-09	1	cg06575425	TSS200	opensea	-0.482755	hypo	1	-0.482755
PMAIP1	12112.8	2.24236	0.351571	6.37812	1.79e-10	1.24e-08	1	cg22549408	TSS1500	shore	-0.338432	hypo	1	-0.338432
TYROBP	245.165	3.81273	0.620479	6.1448	8.01e-10	4.84e-08	1	cg20267005	TSS1500	opensea	-0.355057	hypo	1	-0.355057
CLLU1	706.56	5.71732	0.941954	6.06964	1.28e-09	7.29e-08	1	cg19021431	TSS1500	opensea	-0.225029	hypo	1	-0.225029
KIAA1191	2849.94	1.00441	0.170123	5.90404	3.55e-09	1.77e-07	1	cg05970307	TSS1500	shore	-0.393854	hypo	1	-0.393854
DMKN	371.881	4.19876	0.716255	5.8621	4.57e-09	2.19e-07	1	cg15078284	TSS1500	opensea	-0.294436	hypo	1	-0.294436
SLC35D2	955.252	2.1517	0.367225	5.85934	4.65e-09	2.22e-07	1	cg13771161	TSS1500	shore	-0.459954	hypo	1	-0.459954
SBK1	269.604	2.51504	0.434506	5.78829	7.11e-09	3.25e-07	1	cg04413090	TSS1500	shore	-0.206945	hypo	1	-0.206945
CD2	49.1707	6.62033	1.2008	5.51325	3.52e-08	1.33e-06	1	cg16719404	TSS1500	opensea	-0.363905	hypo	1	-0.363905
DGKG	1776	2.41616	0.451371	5.35293	8.65e-08	2.89e-06	1	cg00434119	TSS1500	shore	-0.67855	hypo	1	-0.67855
RPL41	14900.9	1.28629	0.242133	5.31234	1.08e-07	3.48e-06	1	cg25161889	TSS1500	shelf	-0.356304	hypo	1	-0.356304
KBTBD4	522.7	1.21504	0.228741	5.31186	1.09e-07	3.49e-06	1	cg11341028	TSS1500	shore	-0.300044	hypo	1	-0.300044
BSPRY	296.083	2.75582	0.528416	5.21525	1.84e-07	5.52e-06	1	cg02003202	TSS1500	shore	-0.252989	hypo	1	-0.252989
LRRN1	686.1	2.66811	0.512659	5.20445	1.95e-07	5.79e-06	1	cg02276274	TSS1500	shore	-0.333639	hypo	1	-0.333639
SPAG4	408.527	2.53054	0.49218	5.1415	2.73e-07	7.72e-06	1	cg23713742	TSS1500	shore	-0.574139	hypo	1	-0.574139
DSP	85.7366	-5.25344	1.06955	-4.91181	9.02e-07	2.21e-05	1	cg08250825	TSS1500	shore	0.208308	hyper	1	0.208308
TKTL2	43.8895	3.25801	0.664682	4.90161	9.51e-07	2.31e-05	1	cg22083298	TSS1500	shore	-0.358448	hypo	1	-0.358448
PNMA1	1181.96	1.51194	0.308573	4.89976	9.6e-07	2.33e-05	1	cg09238801	1stExon	shore	-0.262297	hypo	1	-0.262297
GZMH	66.4003	5.93747	1.22819	4.83433	1.34e-06	3.09e-05	1	cg02150910	TSS1500	opensea	-0.675363	hypo	1	-0.675363
LRRC8B	1513.8	1.32124	0.274187	4.81877	1.44e-06	3.31e-05	1	cg01128109	TSS1500	shore	-0.360827	hypo	1	-0.360827
DNAJA2	2721.18	1.01056	0.211014	4.78906	1.68e-06	3.72e-05	1	cg00001854	TSS1500	shore	-0.441358	hypo	1	-0.441358
BZW1	2885.66	1.30727	0.273375	4.78195	1.74e-06	3.84e-05	1	cg10637955	TSS1500	shore	-0.218293	hypo	1	-0.218293
MRPL44	960.392	1.06703	0.239037	4.46386	8.05e-06	0.00013992	1	cg00474696	TSS1500	shore	-0.666455	hypo	1	-0.666455
DRAM1	290.332	1.37867	0.309646	4.45243	8.49e-06	0.000146332	1	cg27425327	TSS1500	shore	-0.302816	hypo	1	-0.302816
JAK2	3772.14	1.15213	0.261739	4.40183	1.07e-05	0.00017862	1	cg20394284	TSS1500	shore	-0.321715	hypo	1	-0.321715
RHOH	9844.84	1.20269	0.273247	4.40148	1.08e-05	0.000178807	1	cg02060717	TSS1500	opensea	-0.258864	hypo	1	-0.258864
UBA7	3697.32	-1.3211	0.302267	-4.37065	1.24e-05	0.000201502	1	cg19381811	TSS1500	opensea	0.270371	hyper	1	0.270371
SQSTM1	5668.32	1.33596	0.313951	4.25532	2.09e-05	0.000309559	1	cg12619504	TSS1500	island	-0.349447	hypo	1	-0.349447
RPL27A	29968	1.12298	0.266103	4.22009	2.44e-05	0.000354404	1	cg21975390	TSS1500	shore	-0.378466	hypo	1	-0.378466
FCN1	178.084	4.26527	1.04548	4.07972	4.51e-05	0.000590273	1	cg17357062	TSS1500	opensea	-0.205665	hypo	1	-0.205665
F5	137.374	2.24829	0.552925	4.06618	4.78e-05	0.000618765	1	cg16054275	TSS1500	opensea	-0.277166	hypo	1	-0.277166
TUBA1A	4920.67	1.4742	0.363082	4.06023	4.9e-05	0.000631587	1	cg22064451	TSS1500	shore	-0.309403	hypo	1	-0.309403
SAMD7	39.0176	3.13265	0.775141	4.04139	5.31e-05	0.000675376	1	cg05721199	TSS1500	opensea	-0.282269	hypo	1	-0.282269
FUT3	15.5372	4.56757	1.16256	3.92889	8.53e-05	0.000997597	1	cg09001777	TSS200	opensea	-0.316769	hypo	1	-0.316769
CD8A	99.193	3.86278	1.01093	3.82101	0.000132904	0.00143553	1	cg09318840	TSS200	shore	-0.209141	hypo	1	-0.209141
SAR1A	3966.01	1.31919	0.350346	3.76538	0.000166294	0.00172863	1	cg07661904	TSS1500	shore	-0.24068	hypo	1	-0.24068
GJA3	3.3237	-5.17028	1.37765	-3.75296	0.000174757	0.00179887	1	cg22900415	TSS1500	island	0.271544	hyper	1	0.271544
S100A6	3296.44	1.39132	0.371172	3.74846	0.000177923	0.00182355	1	cg08106792	TSS1500	shore	-0.270429	hypo	1	-0.270429
GPR156	9.77304	3.38429	0.905097	3.73915	0.000184644	0.00187756	1	cg08414647	TSS1500	opensea	-0.50399	hypo	1	-0.50399
VAMP5	453.277	1.50018	0.412735	3.63473	0.000278269	0.00262869	1	cg23902361	TSS1500	shore	-0.235381	hypo	1	-0.235381
ZNF396	68.9412	1.08377	0.300337	3.60851	0.000307964	0.00284041	1	cg12598270	TSS200	shore	-0.214252	hypo	1	-0.214252
DNAJB8	5.90598	3.52417	0.978749	3.60069	0.000317374	0.00291211	1	cg03022541	TSS1500	opensea	-0.244454	hypo	1	-0.244454
RNF5P1	19.093	2.30439	0.640969	3.59517	0.000324181	0.00296311	1	cg06569121	TSS1500	opensea	-0.301974	hypo	1	-0.301974
FAM198B	11.0142	4.79637	1.37232	3.49509	0.000473903	0.00401577	1	cg07271580	TSS1500	opensea	-0.390725	hypo	1	-0.390725
AKIRIN1	3525.31	1.01929	0.291868	3.4923	0.000478875	0.00405307	1	cg03130816	TSS1500	shore	-0.297966	hypo	1	-0.297966
IL13	21.3518	2.32144	0.665015	3.4908	0.000481573	0.00407143	1	cg06584121	TSS200	shore	-0.222975	hypo	1	-0.222975
FCAR	25.5652	4.65428	1.35511	3.4346	0.000593419	0.00484677	1	cg14055835	TSS1500	opensea	-0.338386	hypo	1	-0.338386
TMEM211	13.0283	3.46704	1.01558	3.41385	0.000640516	0.00514661	1	cg22803285	TSS1500	opensea	-0.303041	hypo	1	-0.303041
ZSCAN10	5.74062	3.21827	0.967502	3.32637	0.000879839	0.00663855	1	cg05469614	1stExon	shelf	-0.281753	hypo	1	-0.281753
MRGPRX4	7.38932	3.77159	1.14832	3.28445	0.00102183	0.00748598	1	cg16010467	1stExon	opensea	-0.342319	hypo	1	-0.342319
ADNP2	2315.33	1.43731	0.438897	3.27482	0.00105729	0.0076813	1	cg26914205	TSS1500	opensea	-0.391266	hypo	1	-0.391266
ULBP3	10.9735	2.04737	0.628727	3.25638	0.00112844	0.00808684	1	cg00432049	TSS1500	shore	-0.347807	hypo	1	-0.347807
APOBEC3G	4183.04	1.05435	0.339844	3.10245	0.00191925	0.0122566	1	cg26082280	TSS1500	opensea	-0.286917	hypo	1	-0.286917
ADHFE1	365.784	1.51792	0.504796	3.00699	0.00263847	0.0155856	1	cg16642695	TSS1500	shore	-0.652632	hypo	1	-0.652632
C19orf33	1.19801	-2.19744	0.741106	-2.96508	0.00302603	0.017402	1	cg08189186	TSS1500	opensea	0.215729	hyper	1	0.215729
TSPYL5	201.722	-2.66804	0.903485	-2.95306	0.00314643	0.0179314	1	cg00032205	TSS200	island	0.297436	hyper	1	0.297436
CDKN1C	34.8577	2.02039	0.684453	2.95183	0.00315892	0.0179954	1	cg21741284	TSS1500	shore	-0.288842	hypo	1	-0.288842
CST7	101.418	2.22449	0.757086	2.93823	0.00330096	0.0186249	1	cg09971811	1stExon	opensea	-0.289106	hypo	1	-0.289106
RPS15	11152.4	1.02917	0.35247	2.91987	0.00350178	0.0194662	1	cg19716018	TSS1500	shore	-0.338143	hypo	1	-0.338143
ELL2	1927.18	1.73687	0.603765	2.87672	0.00401827	0.0216764	1	cg00335744	TSS1500	shore	-0.211952	hypo	1	-0.211952
DPPA3	7.66637	3.81021	1.34084	2.84167	0.00448784	0.0236494	1	cg20927656	TSS1500	opensea	-0.443651	hypo	1	-0.443651
ID3	4500.77	1.67697	0.590398	2.84041	0.00450552	0.0237206	1	cg09858862	TSS1500	shore	-0.387938	hypo	1	-0.387938
SIGLEC7	4.07402	3.83153	1.3516	2.83481	0.00458524	0.0240559	1	cg06367655	TSS1500	opensea	-0.289899	hypo	1	-0.289899
MEFV	30.3273	2.43981	0.862222	2.82968	0.00465946	0.0243153	1	cg21514871	TSS1500	shelf	-0.293143	hypo	1	-0.293143
CMTM5	9.94291	4.17286	1.51119	2.7613	0.00575711	0.0286217	1	cg10560038	TSS1500	opensea	-0.205372	hypo	1	-0.205372
YPEL4	7.21641	3.721	1.34887	2.7586	0.00580495	0.0287892	1	cg22705929	TSS1500	shelf	-0.339227	hypo	1	-0.339227
CD93	47.2276	3.22632	1.17368	2.7489	0.00597958	0.029496	1	cg15309910	TSS1500	opensea	-0.207165	hypo	1	-0.207165
MFSD7	157.319	1.38767	0.505391	2.74574	0.00603751	0.0297062	1	cg25510614	TSS1500	shore	-0.507741	hypo	1	-0.507741
ERMN	1859.53	1.54387	0.56546	2.73029	0.00632792	0.0307823	1	cg21563471	TSS1500	opensea	-0.350628	hypo	1	-0.350628
AFAP1L1	0.910078	-2.68992	0.989186	-2.71933	0.00654142	0.0314607	1	cg09651145	TSS1500	island	0.356137	hyper	1	0.356137
CLDN7	90.5647	1.67465	0.61883	2.70615	0.00680674	0.0324017	1	cg15298719	1stExon	island	-0.303372	hypo	1	-0.303372
ADRB2	329.762	1.03837	0.39255	2.64518	0.00816477	0.0372842	1	cg08370787	1stExon	shore	-0.672434	hypo	1	-0.672434
SERPING1	5.13795	3.2536	1.23034	2.64447	0.00818186	0.0373443	1	cg04772947	TSS1500	opensea	-0.247415	hypo	1	-0.247415
NMB	112.856	1.31928	0.512293	2.57525	0.0100168	0.0435196	1	cg01503516	TSS1500	shore	-0.490545	hypo	1	-0.490545
FYTTD1	4367.78	1.04617	0.407003	2.57043	0.0101571	0.0439771	1	cg20283221	TSS1500	shore	-0.238158	hypo	1	-0.238158
HLA-DQA2	225.361	1.74209	0.691602	2.51893	0.0117714	0.0492028	1	cg20821042	TSS200	opensea	-0.318326	hypo	1	-0.318326

## Sheet: Supplementary Table S8D
DMEGs with DMPs both in promoter and body regions all negative with expression (N = 83)
symbol	baseMean	log2FC	lfcSE	stat	pval	padj	n	DMP_sites	DMP_features	Δβ	pro	pro_n	pro_β	body	body_n	body_β
SEPT9	24894.3	1.16823	0.325153	3.59288	0.000327046	0.0029841	20	cg01513063;cg02397064;cg05626616;cg06380320;cg06622199;cg07324245;cg10997810;cg13061373;cg14608550;cg17053854;cg17112975;cg17922695;cg18278424;cg19422205;cg19654743;cg20557159;cg20688185;cg20923885;cg21808045;cg26079706	Body;Body;Body;Body;Body;Body;Body;5'UTR;5'UTR;Body;Body;Body;Body;Body;TSS200;Body;5'UTR;Body;Body;Body	-0.349184	hypo	1	-0.453013	hypo	16	-0.353422
VOPP1	9740.16	2.50071	0.261326	9.56932	1.08e-21	7.13e-19	16	cg05170183;cg05391282;cg06750076;cg06889086;cg07459478;cg09286421;cg12015615;cg13860281;cg14876996;cg15599795;cg15902297;cg16182302;cg16248926;cg23654401;cg24430703;cg26106590	Body;Body;Body;Body;Body;Body;Body;Body;Body;Body;Body;Body;Body;Body;Body;TSS1500	-0.527266	hypo	1	-0.500984	hypo	15	-0.529018
PPP2R2B	7.2849	4.26879	1.39035	3.0703	0.00213842	0.0133013	10	cg02154084;cg03653855;cg05576845;cg08715720;cg08991927;cg12524428;cg13301454;cg15021031;cg17342759;cg18899516	Body;5'UTR;Body;Body;5'UTR;5'UTR;Body;5'UTR;TSS1500;Body	-0.368383	hypo	1	-0.294353	hypo	5	-0.319765
APBA2	19.6911	5.16856	1.33639	3.86754	0.000109939	0.00123299	9	cg01863596;cg02331808;cg07148167;cg07699300;cg08908089;cg12395299;cg15885043;cg23914328;cg27184903	Body;5'UTR;Body;Body;TSS1500;Body;Body;Body;5'UTR	-0.306197	hypo	1	-0.291995	hypo	6	-0.299485
ROR1	2649.69	5.01299	0.427663	11.7218	9.85e-32	2.34e-28	8	cg00327437;cg03140289;cg03937361;cg03950655;cg06743782;cg07579123;cg07797372;cg24502478	Body;Body;Body;Body;Body;Body;Body;TSS1500	-0.4029	hypo	1	-0.331456	hypo	7	-0.413107
PRDM2	24520.2	1.58608	0.288944	5.48922	4.04e-08	1.49e-06	8	cg07708453;cg11750706;cg19359071;cg23267665;cg24715767;cg25402049;cg25450806;cg26063625	1stExon;Body;TSS1500;TSS1500;Body;TSS1500;1stExon;Body	-0.439301	hypo	5	-0.449332	hypo	3	-0.422582
DLG2	467.781	3.41714	0.652559	5.23653	1.64e-07	4.99e-06	8	cg02675969;cg04923194;cg05174766;cg05405389;cg08432013;cg18023263;cg22907295;cg23424158	Body;TSS1500;Body;Body;Body;Body;Body;TSS1500	-0.385423	hypo	2	-0.482131	hypo	6	-0.353187
IPCEF1	239.942	3.00744	0.700042	4.29609	1.74e-05	0.000265815	8	cg02864954;cg10276116;cg14295437;cg19690214;cg19963522;cg24635109;cg24873280;cg26415516	Body;Body;5'UTR;TSS1500;5'UTR;5'UTR;5'UTR;3'UTR	-0.626115	hypo	1	-0.442023	hypo	2	-0.770327
AHNAK	118212	1.24169	0.29221	4.2493	2.14e-05	0.000316017	8	cg05427381;cg06219806;cg09183450;cg13282971;cg14171514;cg16509239;cg23447569;cg26484813	5'UTR;5'UTR;5'UTR;5'UTR;5'UTR;Body;TSS1500;5'UTR	-0.415199	hypo	1	-0.327525	hypo	1	-0.253286
TIGIT	816.344	2.69306	0.452389	5.95297	2.63e-09	1.38e-07	7	cg09246203;cg13669740;cg19421218;cg19456938;cg20832020;cg22577252;cg22870429	Body;5'UTR;TSS200;TSS200;1stExon;TSS1500;3'UTR	-0.586218	hypo	4	-0.589771	hypo	1	-0.587908
SNX18	4859.36	2.10316	0.410848	5.11907	3.07e-07	8.63e-06	7	cg01582396;cg08544436;cg14684434;cg14952488;cg16358034;cg21995347;cg23001370	Body;1stExon;Body;Body;1stExon;1stExon;Body	-0.555558	hypo	3	-0.490287	hypo	4	-0.604512
CPEB4	4009.58	1.21001	0.292334	4.13915	3.49e-05	0.000473524	7	cg03032025;cg06889108;cg12665414;cg16290431;cg18693985;cg18757087;cg25122699	1stExon;1stExon;Body;Body;Body;1stExon;TSS1500	-0.427744	hypo	4	-0.432969	hypo	3	-0.420778
TMPRSS6	42.1571	1.00326	0.373233	2.68803	0.00718744	0.0337413	7	cg05754122;cg16971128;cg17745234;cg17956747;cg18617091;cg19979738;cg21188731	TSS200;TSS200;1stExon;Body;Body;Body;Body	-0.525201	hypo	3	-0.516374	hypo	4	-0.531822
LAG3	564.503	7.29935	0.976457	7.47534	7.7e-14	1.09e-11	6	cg01820374;cg04153135;cg04671742;cg19421125;cg20652042;cg22777668	Body;TSS1500;1stExon;Body;Body;TSS1500	-0.304192	hypo	3	-0.357725	hypo	3	-0.250659
LAX1	2204.71	1.98137	0.285069	6.95047	3.64e-12	3.77e-10	6	cg00942920;cg06958535;cg12022621;cg17711527;cg23893629;cg25625457	Body;1stExon;1stExon;1stExon;TSS1500;TSS1500	-0.504087	hypo	5	-0.523026	hypo	1	-0.409395
SERINC5	852.335	2.83495	0.42075	6.73787	1.61e-11	1.44e-09	6	cg01267797;cg07172701;cg10531355;cg14711743;cg19683073;cg22422937	Body;Body;Body;Body;TSS1500;Body	-0.423396	hypo	1	-0.260395	hypo	5	-0.455997
ATP1A1	7423.41	1.02325	0.217492	4.70477	2.54e-06	5.33e-05	6	cg04403423;cg17107017;cg17469276;cg18026772;cg20309677;cg25346117	Body;TSS1500;TSS1500;Body;TSS1500;Body	-0.544387	hypo	3	-0.669352	hypo	3	-0.419423
EZR	46888.5	1.59895	0.375898	4.25369	2.1e-05	0.00031117	6	cg13026729;cg13433729;cg15118447;cg15481472;cg16978168;cg23496730	TSS1500;Body;Body;Body;Body;Body	-0.515497	hypo	1	-0.346499	hypo	5	-0.549297
DLGAP4	4047.82	1.10621	0.289464	3.82159	0.000132595	0.00143328	6	cg00159764;cg01982835;cg12492027;cg15730121;cg17566560;cg24216770	5'UTR;TSS200;TSS1500;Body;Body;Body	-0.488107	hypo	2	-0.425426	hypo	3	-0.588344
TGFBI	5077.42	6.89351	0.67714	10.1803	2.43e-24	2.38e-21	5	cg05838308;cg09096234;cg10648763;cg21550219;cg21583694	Body;Body;TSS200;Body;Body	-0.357637	hypo	1	-0.337907	hypo	4	-0.36257
COL9A2	4117.02	2.17713	0.346303	6.28677	3.24e-10	2.11e-08	5	cg02961012;cg04100190;cg07063183;cg10512203;cg12733396	Body;TSS1500;Body;Body;TSS1500	-0.384642	hypo	2	-0.426594	hypo	3	-0.356674
RASGRF1	2929.56	2.65764	0.439117	6.05224	1.43e-09	8.01e-08	5	cg02587988;cg06376992;cg21840434;cg22821300;cg24231513	Body;Body;1stExon;Body;TSS1500	-0.415451	hypo	2	-0.380712	hypo	3	-0.438611
C8orf46	95.1534	2.4139	0.673776	3.58264	0.00034014	0.00308031	5	cg06890415;cg09622557;cg10635330;cg15070801;cg15798873	TSS200;Body;TSS200;Body;Body	-0.524811	hypo	2	-0.311209	hypo	3	-0.667213
LILRA4	1427.44	2.70882	0.7967	3.40006	0.000673721	0.00534769	5	cg02434051;cg03575041;cg20542190;cg23899409;cg24755177	Body;TSS1500;TSS200;TSS200;TSS1500	-0.450387	hypo	4	-0.441067	hypo	1	-0.487669
BTBD19	122.236	1.50972	0.540033	2.79561	0.00518025	0.0264275	5	cg00043599;cg02923972;cg12275060;cg14565781;cg17093466	Body;Body;Body;1stExon;Body	-0.496311	hypo	1	-0.503113	hypo	4	-0.49461
EPS8L2	365.853	1.07329	0.42308	2.53685	0.0111856	0.0473472	5	cg01963374;cg13555772;cg17469934;cg18770763;cg23856257	TSS1500;TSS1500;Body;Body;Body	-0.325486	hypo	2	-0.258884	hypo	3	-0.369886
CDK14	9555.5	2.03998	0.227395	8.97106	2.94e-19	1.21e-16	4	cg03834767;cg09781028;cg15798153;cg21700774	3'UTR;Body;1stExon;Body	-0.591	hypo	1	-0.508467	hypo	2	-0.659933
BMF	11340.8	1.9556	0.2435	8.03122	9.65e-16	2.05e-13	4	cg07712904;cg07887985;cg18494902;cg26662201	Body;TSS200;TSS1500;TSS200	-0.446987	hypo	3	-0.493455	hypo	1	-0.307583
NOD2	1078.03	3.04917	0.426776	7.14466	9.02e-13	1.07e-10	4	cg04172533;cg08554257;cg16771652;cg26954174	Body;TSS1500;TSS1500;TSS1500	-0.389864	hypo	3	-0.422541	hypo	1	-0.291836
FHDC1	531.408	3.75591	0.576058	6.52002	7.03e-11	5.41e-09	4	cg00170487;cg01674147;cg07097184;cg18902697	Body;Body;3'UTR;TSS1500	-0.37992	hypo	1	-0.229307	hypo	2	-0.446523
ABI1	7498.29	1.06731	0.168946	6.31746	2.66e-10	1.77e-08	4	cg03625292;cg17850367;cg18825419;cg26142490	Body;TSS1500;TSS1500;Body	-0.490419	hypo	2	-0.398696	hypo	2	-0.582141
DCLK2	2015.21	3.40354	0.54026	6.29982	2.98e-10	1.96e-08	4	cg03779973;cg05561193;cg10190898;cg12115081	Body;TSS1500;Body;Body	-0.537018	hypo	1	-0.44877	hypo	3	-0.566434
APOBEC3H	94.7307	2.23905	0.357132	6.26952	3.62e-10	2.34e-08	4	cg06229674;cg17972162;cg18696237;cg24424889	TSS1500;Body;TSS1500;5'UTR	-0.505969	hypo	2	-0.521607	hypo	1	-0.482022
ZC3H7A	5509.65	1.16914	0.20743	5.63632	1.74e-08	7.26e-07	4	cg04010868;cg09095525;cg14959707;cg26521448	5'UTR;Body;5'UTR;TSS200	-0.522509	hypo	1	-0.568794	hypo	1	-0.439695
PBX2	840.409	1.09109	0.209934	5.19728	2.02e-07	5.96e-06	4	cg03280235;cg04363228;cg16609995;cg20765522	TSS1500;Body;TSS1500;Body	-0.408424	hypo	2	-0.408092	hypo	2	-0.408757
ZAP70	1690.09	2.90127	0.59531	4.87354	1.1e-06	2.62e-05	4	cg08859278;cg09006159;cg14537825;cg15933451	TSS1500;TSS1500;Body;TSS200	-0.300275	hypo	3	-0.327852	hypo	1	-0.217542
ZBTB32	2006.97	1.44697	0.353962	4.08792	4.35e-05	0.000574189	4	cg03068068;cg08539991;cg09231418;cg21062760	TSS1500;5'UTR;TSS1500;Body	-0.475229	hypo	2	-0.420183	hypo	1	-0.52986
PLK3	1403.11	1.39926	0.343258	4.0764	4.57e-05	0.000597509	4	cg07368443;cg08259083;cg17233819;cg27583604	TSS1500;Body;Body;Body	-0.524021	hypo	1	-0.307996	hypo	3	-0.59603
GPD2	1910.02	1.09804	0.285545	3.84541	0.00012035	0.00132307	4	cg03230175;cg19062174;cg23077884;cg23836163	TSS1500;5'UTR;Body;Body	-0.512604	hypo	1	-0.422024	hypo	2	-0.678153
CD44	12915.6	1.08692	0.347814	3.125	0.00177804	0.0115344	4	cg02663352;cg06975166;cg14593191;cg25096745	Body;TSS1500;Body;Body	-0.403444	hypo	1	-0.302966	hypo	3	-0.436937
FGR	10302	1.11194	0.378965	2.93416	0.00334447	0.0188189	4	cg00404394;cg03018771;cg09845000;cg16897005	5'UTR;Body;TSS1500;TSS1500	-0.38543	hypo	2	-0.423016	hypo	1	-0.385911
DNAJB13	767.209	1.07999	0.372185	2.90177	0.00371063	0.0204074	4	cg04044120;cg13953458;cg19692710;cg20071670	Body;3'UTR;1stExon;1stExon	-0.388584	hypo	2	-0.373434	hypo	1	-0.269954
THEMIS	22.9339	4.33146	1.63389	2.65101	0.00802522	0.0367709	4	cg11610626;cg21326251;cg25269388;cg27638432	5'UTR;5'UTR;Body;TSS1500	-0.290983	hypo	1	-0.220298	hypo	1	-0.338354
AKR1D1	1.68505	2.57911	1.01171	2.54927	0.0107948	0.0460655	4	cg05082563;cg15002691;cg17257469;cg25271841	Body;TSS200;Body;TSS1500	-0.36503	hypo	2	-0.444564	hypo	2	-0.285496
CASS4	314.038	4.59897	0.526486	8.73522	2.43e-18	8.05e-16	3	cg00387658;cg24519157;cg26712809	TSS1500;Body;TSS1500	-0.466934	hypo	2	-0.409695	hypo	1	-0.581413
SRGAP3	278.003	2.68537	0.379762	7.07119	1.54e-12	1.72e-10	3	cg13475822;cg26184741;cg26389316	Body;TSS1500;Body	-0.514792	hypo	1	-0.463749	hypo	2	-0.540313
IGFBP4	4327.72	4.10052	0.616421	6.65215	2.89e-11	2.48e-09	3	cg02627216;cg11961138;cg17980404	TSS1500;TSS1500;Body	-0.346626	hypo	2	-0.284212	hypo	1	-0.471453
IL10RA	19176	1.88931	0.287369	6.57449	4.88e-11	3.96e-09	3	cg05468843;cg07237926;cg26661481	Body;Body;TSS1500	-0.4352	hypo	1	-0.405402	hypo	2	-0.4501
ABCG1	2112.07	1.84712	0.306497	6.02656	1.67e-09	9.17e-08	3	cg00177237;cg05046272;cg20214535	Body;TSS1500;TSS1500	-0.627887	hypo	2	-0.59008	hypo	1	-0.703499
SH2D1B	38.6925	6.60305	1.30206	5.07124	3.95e-07	1.08e-05	3	cg01062020;cg15617640;cg26379475	TSS1500;Body;1stExon	-0.312237	hypo	2	-0.332557	hypo	1	-0.271596
B4GALT1	12575.2	1.18307	0.234683	5.04116	4.63e-07	1.23e-05	3	cg05779272;cg13858803;cg14080050	TSS1500;Body;Body	-0.339393	hypo	1	-0.36777	hypo	2	-0.325204
TK2	255.135	1.346	0.267496	5.03185	4.86e-07	1.29e-05	3	cg00187129;cg07512993;cg09238666	Body;Body;TSS200	-0.654569	hypo	1	-0.645784	hypo	2	-0.658962
MAPKAPK2	8038.74	1.3566	0.270264	5.01954	5.18e-07	1.36e-05	3	cg08055786;cg24141516;cg25741609	TSS1500;Body;Body	-0.492231	hypo	1	-0.557387	hypo	2	-0.459652
CAPN9	27.9704	5.37563	1.10028	4.88568	1.03e-06	2.48e-05	3	cg00563566;cg03704061;cg06585893	1stExon;1stExon;Body	-0.330591	hypo	2	-0.2546	hypo	1	-0.482573
OSBPL5	333.539	5.24125	1.10788	4.73089	2.24e-06	4.79e-05	3	cg01418188;cg06131936;cg20511548	Body;TSS1500;5'UTR	-0.339393	hypo	1	-0.422132	hypo	1	-0.295095
FRK	303.123	3.19848	0.811816	3.93991	8.15e-05	0.00095942	3	cg06127202;cg16176600;cg23628721	Body;1stExon;Body	-0.475933	hypo	1	-0.333326	hypo	2	-0.547237
CKLF	157.517	1.02047	0.284272	3.58978	0.000330961	0.00301251	3	cg02295216;cg04701716;cg09728392	TSS1500;Body;TSS1500	-0.285432	hypo	2	-0.256917	hypo	1	-0.342462
TBC1D1	9531.78	1.10204	0.322931	3.41262	0.000643414	0.00516036	3	cg04710179;cg05196835;cg08266311	TSS1500;Body;Body	-0.345963	hypo	1	-0.299911	hypo	2	-0.368989
SPARC	186.774	3.89821	1.1594	3.36226	0.000773077	0.00598289	3	cg07539983;cg13319042;cg23174201	TSS1500;TSS1500;Body	-0.303484	hypo	2	-0.347426	hypo	1	-0.2156
MBNL2	1853.06	1.05663	0.345961	3.0542	0.00225665	0.0138472	3	cg02838877;cg06340704;cg24714606	TSS1500;5'UTR;Body	-0.328526	hypo	1	-0.365726	hypo	1	-0.367795
MMP14	358.562	1.15024	0.377138	3.04991	0.00228906	0.0139715	3	cg10418289;cg13094752;cg27020028	Body;TSS1500;TSS1500	-0.283361	hypo	2	-0.248396	hypo	1	-0.353291
LCP2	1131.82	1.31682	0.432957	3.04145	0.00235438	0.0142625	3	cg02676052;cg05265596;cg08748308	TSS1500;Body;Body	-0.370491	hypo	1	-0.276814	hypo	2	-0.417329
CTLA4	4506.14	8.30965	0.746503	11.1314	8.82e-29	1.32e-25	2	cg05074138;cg26091609	1stExon;Body	-0.660621	hypo	1	-0.625751	hypo	1	-0.695491
CD5	3707.01	3.74433	0.487731	7.67704	1.63e-14	2.74e-12	2	cg22202088;cg27301655	Body;TSS1500	-0.351412	hypo	1	-0.362705	hypo	1	-0.34012
UGCG	7331.46	1.21733	0.223087	5.45674	4.85e-08	1.75e-06	2	cg01472113;cg14278148	TSS1500;Body	-0.631584	hypo	1	-0.649498	hypo	1	-0.61367
DERL1	3940.81	1.09555	0.210481	5.205	1.94e-07	5.78e-06	2	cg14743346;cg21139496	Body;TSS1500	-0.386352	hypo	1	-0.392386	hypo	1	-0.380318
PLCL2	6493.27	1.12703	0.217218	5.1885	2.12e-07	6.2e-06	2	cg02356435;cg15605530	TSS1500;Body	-0.376686	hypo	1	-0.269093	hypo	1	-0.484279
CPEB1	57.196	3.37713	0.659729	5.11896	3.07e-07	8.63e-06	2	cg00937012;cg11022060	TSS1500;Body	-0.302327	hypo	1	-0.372889	hypo	1	-0.231765
FCER1G	99.1285	3.59683	0.749345	4.79996	1.59e-06	3.59e-05	2	cg20609803;cg20806175	TSS1500;Body	-0.632593	hypo	1	-0.744382	hypo	1	-0.520805
RIT1	1780.4	1.23684	0.263456	4.69468	2.67e-06	5.59e-05	2	cg08256691;cg13795986	TSS1500;Body	-0.375548	hypo	1	-0.525311	hypo	1	-0.225786
AP1S3	1369.96	1.34079	0.286791	4.67516	2.94e-06	6.03e-05	2	cg06751322;cg07813214	Body;TSS1500	-0.470883	hypo	1	-0.393175	hypo	1	-0.548591
GLDN	56.3491	4.73664	1.20332	3.93631	8.27e-05	0.000972921	2	cg05303280;cg05404865	TSS1500;Body	-0.406968	hypo	1	-0.519111	hypo	1	-0.294824
CABLES1	746.143	2.78265	0.711463	3.91116	9.19e-05	0.00106195	2	cg22158648;cg26052586	TSS1500;Body	-0.447668	hypo	1	-0.484125	hypo	1	-0.41121
GZMB	77.4233	3.94213	1.03378	3.81332	0.00013711	0.0014698	2	cg03875678;cg18118198	TSS200;Body	-0.314084	hypo	1	-0.385307	hypo	1	-0.242861
PHF13	818.697	1.11561	0.305728	3.64902	0.000263245	0.00251093	2	cg06778853;cg12907598	TSS1500;Body	-0.51102	hypo	1	-0.416149	hypo	1	-0.605892
CLU	148.538	3.86012	1.15751	3.33484	0.000853472	0.00648001	2	cg02393097;cg13620439	TSS1500;Body	-0.396275	hypo	1	-0.401099	hypo	1	-0.391452
SNX9	4697.37	1.57883	0.474666	3.32619	0.000880405	0.00664024	2	cg04064963;cg15264757	TSS1500;Body	-0.344671	hypo	1	-0.442546	hypo	1	-0.246796
POU5F1	14.3539	2.17566	0.66336	3.27976	0.00103896	0.00758296	2	cg07764829;cg15316118	1stExon;Body	-0.669879	hypo	1	-0.733679	hypo	1	-0.606079
TBX21	557.583	1.20261	0.372465	3.22877	0.00124323	0.00871211	2	cg08670136;cg16928046	TSS1500;Body	-0.50015	hypo	1	-0.352231	hypo	1	-0.64807
LTK	870.266	1.75027	0.573202	3.05349	0.00226193	0.0138677	2	cg03321553;cg18168740	TSS200;Body	-0.28216	hypo	1	-0.346065	hypo	1	-0.218255
SCNN1A	5.50878	2.63478	0.932471	2.82559	0.00471935	0.0245558	2	cg22245858;cg26244013	TSS200;Body	-0.403544	hypo	1	-0.252127	hypo	1	-0.55496
CAND2	148.468	1.11404	0.398941	2.79251	0.00523014	0.0265915	2	cg00351152;cg11200930	TSS1500;Body	-0.378551	hypo	1	-0.308108	hypo	1	-0.448994
RAB43	132.013	1.52255	0.549543	2.77057	0.00559589	0.0280702	2	cg01313358;cg05859076	TSS1500;Body	-0.361696	hypo	1	-0.353556	hypo	1	-0.369835

## Sheet: Supplementary Table S8E
DMEGs with DMPs in promoter negative and body regions positive with expression (N = 9)
symbol	baseMean	log2FC	lfcSE	stat	pval	padj	n	DMP_sites	DMP_features	Δβ	pro	pro_n	pro_β	body	body_n	body_β
MACROD2	429.19	-2.41769	0.620373	-3.89716	9.73275e-05	0.00111469	7	cg01552272;cg04476531;cg04624110;cg23169957;cg25557432;cg25697357;cg26059153	TSS200;5'UTR;TSS200;TSS200;TSS200;Body;1stExon	0.165418	hyper	5	0.331626	hypo	1	-0.248308
ADAMTS17	4.27527	-3.19952	0.889887	-3.59542	0.000323868	0.0029612	7	cg00149679;cg03300787;cg04822808;cg05027458;cg20941820;cg21314318;cg27344315	Body;Body;5'UTR;5'UTR;TSS200;Body;Body	-0.0247326	hyper	1	0.262116	hypo	4	-0.251754
TJP1	1.63562	-6.10985	2.01187	-3.03691	0.0023902	0.0144304	5	cg06525993;cg09812397;cg12685846;cg16225947;cg19965221	Body;Body;TSS200;Body;5'UTR	-0.0855096	hyper	1	0.21704	hypo	3	-0.312649
MET	11.989	-8.60987	1.57063	-5.48178	4.21062e-08	1.54491e-06	4	cg11319403;cg22116492;cg24197567;cg24627299	Body;Body;Body;TSS1500	-0.152462	hyper	1	0.211299	hypo	3	-0.273716
OSBPL1A	11.8047	-2.64398	0.802909	-3.293	0.000991261	0.00729093	3	cg05709468;cg23742217;cg25983589	Body;Body;TSS1500	-0.256359	hyper	1	0.249289	hypo	2	-0.509182
SYN2	0.910673	-4.68342	1.57227	-2.97876	0.00289417	0.0167929	3	cg10110335;cg16858253;cg20888142	Body;Body;TSS200	-0.0816667	hyper	1	0.371755	hypo	2	-0.308378
KCNG2	4.03358	-3.93584	0.648877	-6.06561	1.31453e-09	7.44081e-08	2	cg23825213;cg25458083	TSS200;Body	-0.0355192	hyper	1	0.213054	hypo	1	-0.284092
AGBL4	5.7478	-1.68932	0.466836	-3.61865	0.000296139	0.00275906	2	cg16515477;cg21834207	Body;TSS1500	-0.0865035	hyper	1	0.220409	hypo	1	-0.393416
ME3	6.43089	-2.51522	0.836028	-3.00853	0.00262511	0.0155195	2	cg14883291;cg22266072	TSS1500;Body	-0.000286625	hyper	1	0.25785	hypo	1	-0.258423
